# Supplementary material for: Kampo formulas alleviate aging-related emotional disturbances and neuroinflammation in male senescence-accelerated mouse prone 8 mice
Source: Aging (Albany NY). 2022 Jan 3;14(1):109–42. doi: 10.18632/aging.203811 (PMC8791223; doi:10.18632/aging.203811)
Supplement: Supplementary Table 1 [file aging-14-203811-s002.xlsx]

## Sheet: Recov_V
Supplementary Table 1. A full list of significantly V-shaped recovered genes under physiological condition.
			SAMR1/water		SAMP8/water		SAMP8/KS		SAMP8/NKS		SAMP8/HJG
Category	Gene_ID	Gene_name	AVG	SEM	AVG	SEM	AVG	SEM	AVG	SEM	AVG	SEM
a	ENSMUSG00000089755	0610012D04Rik	1.2054	0.586041	5.55e-17	0	1.1999	0.798305	0.200725	0.20025	0.79473	0.791573
a	ENSMUSG00000043773	1700048O20Rik	331.181	35.5015	216.117	31.775	352.85	24.1556	287.94	19.2687	244.879	28.1315
a	ENSMUSG00000097651	4930461G14Rik	3.79737	1.55812	0.399655	0.398722	3.20185	1.19762	1.40579	0.981642	1.21036	0.493167
a	ENSMUSG00000054457	9430021M05Rik	131.413	8.22002	102.113	8.79158	137.757	12.9307	109.506	8.30105	108.532	11.0923
a	ENSMUSG00000098008	A930001A20Rik	18.2455	3.3946	1.60831	0.747623	6.01149	1.25824	4.2344	1.56642	4.81809	1.3409
a	ENSMUSG00000057228	Aadat	8.00965	1.78537	2.599	0.97453	10.21	3.54462	4.42598	1.20324	2.6266	0.886113
a	ENSMUSG00000106270	C820005J03Rik	2.80485	0.80135	0.204556	0.204499	4.00391	1.66658	1.21447	0.811371	1.61652	0.760941
a	ENSMUSG00000052212	Cd177	0.800486	0.489814	5.55e-17	0	1.20034	0.489234	0.40651	0.406146	5.55e-17	0
a	ENSMUSG00000028076	Cd1d1	38.4771	4.35605	20.6827	2.78391	32.691	4.93259	27.6229	1.66137	22.1533	2.90515
a	ENSMUSG00000027487	Cdk5rap1	446.723	20.1687	394.95	7.47014	459.124	14.0485	442.92	22.08	436.731	15.3207
a	ENSMUSG00000045538	Ddx28	702.36	17.1697	595.191	18.7108	670.58	19.6085	646.359	22.8555	662.972	26.4854
a	ENSMUSG00000003549	Ercc1	771.603	31.3863	694.397	12.4826	801.271	6.63359	717.309	8.08912	723.045	17.1413
a	ENSMUSG00000071517	Gm10334	17.4334	1.35556	9.25718	2.17577	18.4414	4.48304	14.7344	2.24511	15.1249	1.43212
a	ENSMUSG00000085782	Gm15624	42.4828	6.30718	19.496	2.30841	31.0481	6.57684	27.821	3.05583	21.6128	3.11485
a	ENSMUSG00000092448	Gm20387	57.704	7.67353	6.03361	1.3113	12.4343	3.12117	7.66757	1.8759	7.4587	2.01783
a	ENSMUSG00000095562	Gm21887	899.767	106.707	105.173	13.3919	161.255	36.1196	104.288	3.89853	100.42	8.41504
a	ENSMUSG00000064658	Gm24166	3.20571	0.585597	0.601366	0.400488	4.20944	0.660305	1.40461	0.872135	2.63002	0.887789
a	ENSMUSG00000092845	Gm24328	2.60462	1.25209	5.55e-17	0	1.00426	0.779167	0.200619	0.200133	0.807259	0.492529
a	ENSMUSG00000100536	Gm28873	5.61047	0.6827	0.801039	0.48921	4.81325	1.02717	2.00951	0.632692	1.60833	0.399254
a	ENSMUSG00000071867	Gm6304	40.6831	5.83432	28.1499	1.99095	42.4883	8.10111	30.6355	1.90139	30.2045	4.2218
a	ENSMUSG00000098006	Gm8565	2.60248	1.07702	0.200008	0.19954	2.40864	1.16844	1.00519	0.549161	1.217	0.739684
a	ENSMUSG00000096156	Gm9242	9.40664	2.09735	4.41571	0.660078	11.8184	1.94198	6.84069	1.76158	7.27821	1.91095
a	ENSMUSG00000071113	Mboat4	20.2286	2.44141	8.84319	1.85014	15.6408	2.72981	14.5336	2.77359	13.5641	3.28133
a	ENSMUSG00000099289	Mir6403	1.20235	0.490421	5.55e-17	0	1.80245	0.79852	0.40118	0.40021	0.397069	0.395481
a	ENSMUSG00000032306	Mpi	2234.15	45.8998	2049.84	113.255	2276.27	34.7114	2159.79	28.409	2160.54	48.5779
a	ENSMUSG00000036381	P2ry14	71.9003	8.37707	47.0306	2.3201	65.3364	6.17489	60.0686	7.70407	62.0513	7.42255
a	ENSMUSG00000028139	Riiad1	56.4825	7.59831	39.952	2.88704	56.9168	5.17781	44.3093	5.0283	47.5786	3.5953
a	ENSMUSG00000048758	Rpl29	65.2071	34.2611	32.9556	2.34995	62.376	33.2441	38.0725	10.7303	36.0586	3.32606
a	ENSMUSG00000028012	Rrh	11.6104	3.68962	4.82428	1.35515	11.0216	2.48546	5.85251	1.29772	6.26103	2.03454
a	ENSMUSG00000037455	Slc18b1	965.25	21.868	380.952	20.1707	437.455	24.6608	418.937	7.63317	407.286	20.7355
a	ENSMUSG00000011486	Slc25a41	17.8137	4.37754	3.00766	1.40628	8.41064	1.70905	3.62479	0.741106	6.06879	1.712
a	ENSMUSG00000092887	Snord53	8.80888	1.34061	5.55e-17	0	1.20222	1.20121	5.55e-17	0	5.55e-17	0
a	ENSMUSG00000085286	Ube4bos3	14.832	2.71437	6.83545	1.35823	15.0322	0.868492	8.87437	1.94457	6.45265	3.00315
a	ENSMUSG00000037438	Uqcrh-ps1	20.0253	3.26954	11.8452	1.81909	20.0347	3.64213	12.4907	1.4454	14.8809	3.34508
a	ENSMUSG00000081413	Uqcrh-ps2	2.60242	1.40167	0.399655	0.398722	2.80437	0.794696	1.60631	0.748465	1.62199	0.754997
a	ENSMUSG00000078498	Zfp988	3.40684	0.514371	0.399152	0.243668	2.40458	1.50509	1.40454	0.871975	0.598239	0.39558
b	ENSMUSG00000045165	AI467606	78.1539	6.92003	53.842	5.27887	70.5733	5.68172	77.8743	7.02003	68.1526	7.88967
b	ENSMUSG00000030344	Akap3	7.61644	2.71854	2.20087	0.79895	6.8247	2.59019	8.06301	2.28183	3.43482	0.991524
b	ENSMUSG00000056418	BC043934	33.2476	3.0572	16.4307	3.59313	27.4546	3.28248	27.858	5.25776	14.9816	3.04783
b	ENSMUSG00000044719	E230025N22Rik	9.41082	2.92287	2.8207	0.753597	7.81983	1.80498	7.86809	0.820585	6.4374	1.29157
b	ENSMUSG00000097430	Gm10544	22.6403	1.10889	7.84495	1.21764	16.0431	2.11375	17.7425	4.97013	8.49385	1.04818
b	ENSMUSG00000073752	Gm10570	24.8413	2.23324	9.81955	2.94178	18.4351	1.88373	18.5649	3.77621	13.3353	1.90429
b	ENSMUSG00000052865	Gm13619	7.21036	0.481368	2.01221	0.631323	6.62634	3.27308	8.07906	1.69191	3.84393	1.58953
b	ENSMUSG00000078881	Gm14434	114.436	70.7295	12.8551	2.14344	77.2561	37.6735	136.617	67.4257	23.2621	17.4278
b	ENSMUSG00000086414	Gm15645	2.40312	0.811843	0.200946	0.200535	2.20509	0.735441	1.60562	1.12254	1.40697	0.399049
b	ENSMUSG00000086083	Gm15829	12.4152	1.41648	5.63026	2.39291	13.2284	1.45521	11.4736	2.73375	7.4468	2.39431
b	ENSMUSG00000082840	Gm16421	14.6153	3.63705	5.61695	2.48607	13.6314	3.94212	12.7066	3.43174	3.43095	0.982764
b	ENSMUSG00000098047	Gm18822	4.00379	1.09194	0.200946	0.200535	2.81133	1.20361	4.85185	1.52982	1.20782	1.20362
b	ENSMUSG00000093751	Gm3307	1.79958	0.858131	5.55e-17	0	1.20184	0.799055	1.61937	0.942214	0.201503	0.200793
b	ENSMUSG00000106466	Gm40348	1.20348	0.802885	5.55e-17	0	3.60894	2.22651	2.01728	0.635062	0.807918	0.493039
b	ENSMUSG00000104707	Gm43649	1.20557	0.803597	5.55e-17	0	1.20692	1.2065	2.02635	1.57217	0.407931	0.407099
b	ENSMUSG00000103532	Gm4430	47.3081	6.67678	32.3398	2.59848	49.1279	7.69777	50.6315	3.62814	45.7729	4.80131
b	ENSMUSG00000098210	Gm5224	1.60668	1.16989	5.55e-17	0	1.9987	1.54533	2.82269	1.50115	1.20424	0.803868
b	ENSMUSG00000020857	Nme2	56.677	4.66231	38.2203	3.2502	55.3343	2.6437	67.0497	6.85461	43.944	4.24056
b	ENSMUSG00000022941	Ripply3	5.59932	2.02939	1.99778	1.25949	7.61401	1.45959	7.45734	0.73566	4.43589	1.17073
b	ENSMUSG00000082964	Rpl13-ps5	3.20593	0.803018	0.204556	0.204499	4.01143	0.636851	4.44876	1.75115	1.20304	0.488503
b	ENSMUSG00000094989	Rpl9-ps4	188.515	5.64782	130.043	4.67183	169.011	6.84518	161.698	3.94074	146.838	8.37727
b	ENSMUSG00000085081	Rptoros	4.00233	2.08913	0.407991	0.407878	3.21374	1.20694	2.83235	1.52002	0.20448	0.204063
b	ENSMUSG00000038984	Tspyl5	2152.23	45.4065	1979.74	35.6699	2140.63	59.1162	2178.89	33.5423	2102.16	50.7352
b	ENSMUSG00000066000	Zfp979	95.7346	4.53995	38.4162	2.71801	67.5668	9.69608	62.7301	3.46376	46.7897	5.72129
c	ENSMUSG00000097515	1700040D17Rik	69.6709	9.41722	38.4098	4.07173	50.9349	6.77724	64.3604	8.00793	47.2764	5.11094
c	ENSMUSG00000100876	2810454H06Rik	37.2571	2.11316	18.8724	1.43538	20.8503	3.85894	28.6419	3.84369	26.5584	4.27241
c	ENSMUSG00000103715	4933431K14Rik	95.7151	7.1935	69.073	4.75932	87.4091	11.5782	91.4371	10.0941	87.818	6.6571
c	ENSMUSG00000106951	5930430L01Rik	347.511	16.9392	242.347	13.7291	234.198	12.6925	296.837	18.1032	280.969	12.6488
c	ENSMUSG00000097049	6530411M01Rik	27.0505	1.39408	15.2815	1.18761	23.4626	4.32505	25.4218	2.94665	23.8406	4.60151
c	ENSMUSG00000097375	6720427I07Rik	300.998	28.048	232.828	15.6593	254.026	6.90464	285.02	16.742	273.792	18.728
c	ENSMUSG00000097648	9330185C12Rik	9.60856	2.30746	3.02566	0.910217	5.21346	1.77512	10.2705	2.93007	4.6518	1.75419
c	ENSMUSG00000103181	A330069K06Rik	22.6337	4.80473	13.0853	1.44446	13.4267	1.75722	22.0034	3.27443	15.5248	2.20354
c	ENSMUSG00000054135	A430110L20Rik	28.2336	3.03574	17.6595	3.4734	24.6397	3.63994	29.0799	4.68746	23.7986	3.09376
c	ENSMUSG00000084890	A830036E02Rik	853.666	73.7684	623	40.4277	705.349	70.2023	813.687	87.3887	756.9	86.6548
c	ENSMUSG00000084381	AA413626	4.01255	1.09994	0.200946	0.200535	2.00466	1.26662	4.03726	2.11318	1.22171	1.21925
c	ENSMUSG00000015243	Abca1	2595	112.653	2107.36	78.4273	2135.23	100.374	2356.49	78.7579	2195.21	50.5484
c	ENSMUSG00000022229	Atp12a	8.81222	1.23488	2.40248	1.16371	3.60611	2.71561	7.66944	2.50622	3.22116	1.50213
c	ENSMUSG00000054843	Atrnl1	6736.88	209.719	5446.58	84.0373	5538.6	81.9827	6052.44	176.089	5852.26	244.384
c	ENSMUSG00000071753	C230004F18Rik	384.716	15.121	261.446	5.64411	288.658	15.2903	334.885	17.0412	307.138	28.9395
c	ENSMUSG00000091648	C2cd4d	22.8312	3.24586	13.8721	1.32958	14.4311	2.03041	23.0244	3.79101	17.9726	1.61469
c	ENSMUSG00000035914	Cd276	389.794	12.5261	285.526	5.57504	290.307	8.61171	340.56	27.0083	305.132	17.1529
c	ENSMUSG00000020652	Cenpo	145.635	8.49422	120.635	5.18356	129.537	5.70195	150.265	11.5465	130.748	3.84809
c	ENSMUSG00000048327	Ckap2l	33.0363	3.09758	21.6667	2.46688	22.8625	1.44642	34.0932	5.0531	30.2299	3.47442
c	ENSMUSG00000030159	Clec1b	11.6242	2.63522	2.02182	0.907387	5.21397	1.24536	6.4281	2.92945	4.42481	1.57419
c	ENSMUSG00000020953	Coch	681.254	73.7165	512.778	71.3265	534.001	74.0485	675.299	42.6642	624.228	51.4223
c	ENSMUSG00000053007	Creb5	126.935	14.0316	69.9243	6.38322	79.0295	11.1824	101.157	16.7756	74.9967	11.0664
c	ENSMUSG00000096957	E230013L22Rik	13.3979	4.90089	2.61619	0.97844	7.00421	3.25228	14.3488	3.81881	5.67434	2.36514
c	ENSMUSG00000021416	Eci3	7.60769	1.01452	1.80244	0.970027	2.40772	0.818356	5.24811	0.987481	3.84838	1.04282
c	ENSMUSG00000034488	Edil3	7764.14	290.251	7020.57	306.884	7054.93	156.092	7862.92	176.692	6893.42	143.851
c	ENSMUSG00000073791	Efcab7	133.197	5.16928	76.076	4.71806	76.3463	6.67865	100.984	8.72836	82.0422	11.174
c	ENSMUSG00000101458	ENSMUSG00000101458	46.8804	3.11667	30.9468	3.10672	31.4634	2.77465	48.6122	6.62133	38.6418	4.46457
c	ENSMUSG00000103283	ENSMUSG00000103283	87.7049	5.41524	68.7811	4.2404	82.1733	6.17764	91.7551	7.38811	75.6176	6.72457
c	ENSMUSG00000048120	Entpd1	548.921	24.6342	475.1	18.3704	491.227	25.8993	568.772	10.8078	496.113	7.83826
c	ENSMUSG00000005540	Fcer2a	42.0526	4.63193	22.1252	1.86489	26.2663	1.73444	34.3329	5.57195	31.5388	2.64122
c	ENSMUSG00000074847	Gm10775	6.8155	1.50659	1.60202	0.74859	4.21299	0.808026	4.63931	1.33289	3.63586	1.35192
c	ENSMUSG00000066060	Gm12866	4.60831	0.876496	0.79936	0.487992	1.19909	0.797995	4.43806	1.60633	3.03631	1.43277
c	ENSMUSG00000081572	Gm14138	21.6183	3.5061	10.4652	1.22959	12.828	1.84781	24.1229	6.13573	16.3527	2.72165
c	ENSMUSG00000078880	Gm14308	42.4492	8.5784	12.4688	2.47879	15.6268	4.13223	24.5556	7.11526	10.295	2.77541
c	ENSMUSG00000078903	Gm14391	255.722	32.4157	107.77	15.3199	118.7	38.2572	204.415	40.6484	116.635	20.163
c	ENSMUSG00000081431	Gm15483	22.8273	2.04746	13.2938	3.02677	21.8652	2.34448	22.5544	3.30492	21.3797	3.51274
c	ENSMUSG00000077637	Gm22771	138.372	11.2056	105.131	3.82178	122.835	9.5879	131.518	8.3421	117.128	11.4603
c	ENSMUSG00000101162	Gm26728	3.60482	1.83224	0.204556	0.204499	1.8021	0.914294	3.43056	0.986319	2.00508	0.891192
c	ENSMUSG00000097258	Gm26767	89.1617	11.8486	32.1492	1.12373	39.8864	4.99997	46.4036	2.93076	37.5528	3.32933
c	ENSMUSG00000099564	Gm28729	23.8017	6.43301	4.79899	1.45469	8.21212	3.59079	12.8778	4.39945	6.43655	2.90236
c	ENSMUSG00000100455	Gm29170	398.863	11.0004	334.436	10.6544	380.455	25.6701	394.498	10.8121	364.661	19.3557
c	ENSMUSG00000101872	Gm29237	119.187	4.20193	79.7475	8.81	84.6502	7.71461	107.094	9.1499	93.0632	10.536
c	ENSMUSG00000093887	Gm3033	12.0321	4.2737	5.55e-17	0	5.55e-17	0	0.809359	0.495252	5.55e-17	0
c	ENSMUSG00000105907	Gm34333	9.83249	3.40669	3.20866	0.958348	5.81704	1.21192	11.3108	3.06364	5.03928	0.883978
c	ENSMUSG00000103839	Gm37607	180.268	9.88456	93.8522	4.48587	97.0255	6.53852	125.464	14.1195	118.285	9.67184
c	ENSMUSG00000102863	Gm37639	12.015	1.8917	3.21921	0.805432	7.22306	2.43558	9.87151	2.72574	5.46899	1.64162
c	ENSMUSG00000104362	Gm37928	192.498	13.988	123.301	7.18138	142.722	7.43102	157.394	15.1043	146.981	16.5408
c	ENSMUSG00000105541	Gm43136	10.8162	2.05821	4.82461	1.49369	5.60827	2.03329	11.2736	3.48744	9.69907	1.20088
c	ENSMUSG00000106384	Gm43188	3.00351	0.890841	5.55e-17	0	5.55e-17	0	1.617	0.759842	0.397069	0.395481
c	ENSMUSG00000105228	Gm43340	2.00726	1.10048	5.55e-17	0	0.801516	0.490328	2.41941	0.399082	5.55e-17	0
c	ENSMUSG00000105561	Gm43462	9.21031	1.48794	3.60527	1.83519	4.41237	0.75212	9.07607	2.45939	6.88449	1.39619
c	ENSMUSG00000106565	Gm43582	14.8289	2.41197	4.23472	1.3833	7.01808	2.00539	12.7087	1.90952	6.45951	0.987712
c	ENSMUSG00000104654	Gm43814	2.40242	1.46736	5.55e-17	0	5.55e-17	0	2.01846	1.27181	0.79473	0.791573
c	ENSMUSG00000094076	Gm4767	21.8499	2.83187	12.238	1.56752	17.436	1.97385	25.8083	3.54957	17.9793	3.24094
c	ENSMUSG00000086229	Gm4887	15.63	1.73667	8.45062	2.62943	12.826	2.32077	15.7067	4.14468	11.7188	2.77263
c	ENSMUSG00000081456	Gm7781	1.20396	1.20325	5.55e-17	0	0.801507	0.80083	2.41058	0.979325	0.813214	0.497141
c	ENSMUSG00000081668	Gm7869	1.40275	0.748853	5.55e-17	0	0.401016	0.400702	1.61494	0.403648	0.607115	0.403498
c	ENSMUSG00000046747	Gm9812	6.81204	0.738023	2.40944	0.924304	5.01305	2.05367	9.67058	1.41749	5.25233	0.814708
c	ENSMUSG00000097271	Gm9903	19.2221	2.02453	8.44064	0.739394	11.4263	1.32382	17.5816	4.82243	12.7131	2.61462
c	ENSMUSG00000028901	Gmeb1	952.513	14.2517	814.489	21.1978	801.658	17.0758	943.711	46.0211	897.126	16.1062
c	ENSMUSG00000050675	Gp1ba	36.8543	3.31268	22.5328	1.94192	23.4594	2.40992	35.6936	6.30812	23.2584	3.71216
c	ENSMUSG00000090523	Gypc	97.9644	7.27975	62.8942	7.06324	59.9517	4.33625	89.5054	11.3095	80.7662	9.5199
c	ENSMUSG00000091705	H2-Q2	2.20579	1.02068	5.55e-17	0	0.399403	0.399008	1.41241	0.751037	5.55e-17	0
c	ENSMUSG00000074342	I830077J02Rik	61.143	6.96522	26.1671	4.20607	26.0715	4.16125	46.9988	2.54232	38.0404	6.67546
c	ENSMUSG00000040498	Igsf23	2.40037	1.93648	5.55e-17	0	0.399403	0.399008	1.41348	0.752582	0.407931	0.407099
c	ENSMUSG00000042155	Klhl23	3169.15	97.5083	2924.8	53.0815	3030.21	63.7168	3147.77	59.3526	3125.68	50.9987
c	ENSMUSG00000025597	Klhl4	651.43	37.0466	536.013	37.632	615.111	19.2958	642.139	32.1187	527.223	31.0456
c	ENSMUSG00000019823	Mical1	325.318	15.8444	258.459	2.94822	282.251	9.78909	307.044	26.5469	298.165	21.7567
c	ENSMUSG00000092807	Mir199b	6.60799	1.43375	0.400103	0.39917	2.00177	0.706621	2.61965	0.506766	0.807259	0.492529
c	ENSMUSG00000043015	Nemp2	261.518	18.1088	184.331	9.68672	166.046	6.64449	235.407	24.3384	216.843	8.89506
c	ENSMUSG00000022061	Nkx3-1	73.942	5.30098	49.3868	6.72979	44.0789	7.83775	75.0809	7.13936	66.2613	9.99815
c	ENSMUSG00000079539	Obp2b	2.80963	1.49903	0.200008	0.19954	1.20061	0.800339	3.02818	0.641992	0.807918	0.493039
c	ENSMUSG00000028636	Ppcs	249.107	17.2193	202.125	13.1913	208.092	2.68904	249.849	13.057	232.003	13.5897
c	ENSMUSG00000029513	Prkab1	725.387	11.4805	556.495	18.4645	528.214	20.1141	651.184	72.9596	625.567	29.7674
c	ENSMUSG00000033278	Ptprm	1971.35	24.8382	1716	41.5944	1780.46	92.5348	1905.34	80.57	1874.66	23.5943
c	ENSMUSG00000028476	Reck	585.053	31.4745	293.52	11.6912	285.56	10.9841	340.749	13.5006	306.899	16.4281
c	ENSMUSG00000043190	Rfesd	675.248	22.0897	555.278	24.9286	526.594	15.4331	623.196	37.2555	574.611	21.3261
c	ENSMUSG00000028133	Rwdd3	463.083	19.8399	266.225	10.8834	264.028	7.82702	308.807	11.3057	303.797	16.403
c	ENSMUSG00000046056	Sbsn	145.37	9.34784	104.806	6.30951	112.411	11.3748	129.46	4.74698	115.592	3.70545
c	ENSMUSG00000041920	Slc16a6	445.103	14.7289	364.842	15.1021	365.095	11.3131	442.327	23.4112	383.541	17.9788
c	ENSMUSG00000021565	Slc6a19	25.4261	3.53984	10.8405	2.85113	17.6214	5.28303	21.3562	4.09788	13.7826	4.14302
c	ENSMUSG00000032397	Tipin	544.442	12.5641	330.273	18.0377	321.202	16.2915	403.406	38.0393	388.079	44.5136
c	ENSMUSG00000085819	Ube4bos1	5.19951	2.233	0.814818	0.814592	1.00176	0.775386	7.25744	2.42205	1.40865	0.754798
c	ENSMUSG00000049164	Zfp518a	670.385	39.5283	543.832	33.51	563.146	26.9546	654	19.6077	622.637	16.3215
c	ENSMUSG00000059142	Zfp945	802.666	16.0065	605.815	29.1415	576.861	11.85	741.132	68.4668	691.303	18.5646
c	ENSMUSG00000072774	Zfp951	53.7228	6.77141	22.5196	4.06513	24.2603	2.743	40.3771	5.49209	22.2066	2.56591
d	ENSMUSG00000107002	0610012G03Rik	406.145	27.3726	348.234	15.0527	432.713	18.1302	357.563	13.7755	400.33	17.6048
d	ENSMUSG00000107121	1110006O24Rik	27.6451	3.06997	10.2357	2.73522	24.8518	2.6202	14.5209	1.73579	22.3854	2.50884
d	ENSMUSG00000044306	4930500M09Rik	1.40379	0.981197	5.55e-17	0	1.80398	0.801204	5.55e-17	0	2.44345	1.97202
d	ENSMUSG00000060063	Alox5ap	90.1634	6.58482	66.7202	4.8239	87.6372	8.66297	79.6214	1.82922	90.1514	13.5847
d	ENSMUSG00000028348	Cavin4	25.4327	2.92605	16.887	1.04427	26.8718	3.09747	21.7891	3.70886	30.2801	1.30066
d	ENSMUSG00000078795	Ceacam15	4.80727	0.487464	5.55e-17	0	1.202	0.800694	0.40118	0.40021	1.20963	0.492708
d	ENSMUSG00000082932	Cyp2j8	4.80676	2.03839	5.55e-17	0	1.60448	0.401111	5.55e-17	0	2.4068	1.15383
d	ENSMUSG00000106943	Dancr	8.01352	2.02886	3.0068	1.0867	9.62645	1.81827	6.25115	0.665216	9.0909	2.61408
d	ENSMUSG00000063757	ENSMUSG00000063757	6.61272	1.47724	2.21227	0.660352	7.21719	1.01828	3.22377	0.968758	6.27255	1.42811
d	ENSMUSG00000050234	Gja4	101.742	6.77539	77.3784	10.1832	109.677	6.94346	97.2557	6.39108	103.87	12.2172
d	ENSMUSG00000087040	Gm14033	13.8201	4.24997	4.82886	1.02869	12.0283	1.41361	9.49545	2.6928	11.4819	3.79763
d	ENSMUSG00000083622	Gm15570	2.00904	1.27053	5.55e-17	0	3.40753	1.77948	0.401822	0.400926	1.62429	0.755699
d	ENSMUSG00000087373	Gm15892	18.2264	3.00333	4.03448	1.43132	14.0272	2.34094	5.44422	1.40627	8.27583	1.12017
d	ENSMUSG00000084940	Gm15935	2.80484	1.24393	5.55e-17	0	1.40429	1.16737	0.402048	0.401177	1.20823	0.491832
d	ENSMUSG00000086914	Gm16124	22.2346	1.55154	9.64476	3.28269	24.6533	2.04266	16.5236	1.65775	19.9432	2.49524
d	ENSMUSG00000087646	Gm1667	2.20392	0.803396	5.55e-17	0	1.20253	0.49032	0.803206	0.490477	1.60584	1.17228
d	ENSMUSG00000091034	Gm17660	1.60307	0.511804	5.55e-17	0	1.80301	0.662469	0.401364	0.400415	1.20517	0.489852
d	ENSMUSG00000065304	Gm23245	1.80462	1.35814	5.55e-17	0	2.60255	1.07741	5.55e-17	0	1.81545	0.667312
d	ENSMUSG00000097857	Gm26603	1.20235	0.490421	5.55e-17	0	1.60117	1.16717	1.00916	0.448942	1.61716	0.753482
d	ENSMUSG00000096962	Gm26622	4.20372	1.68263	0.810992	0.496673	4.20925	0.484834	2.01717	0.317672	3.83228	1.01893
d	ENSMUSG00000097431	Gm26782	54.4961	2.5623	16.2362	3.86516	29.0635	3.43506	23.0604	7.56489	31.0388	5.0782
d	ENSMUSG00000099812	Gm28515	1.20127	0.800584	5.55e-17	0	1.20416	0.804033	0.401364	0.400415	1.19893	0.792406
d	ENSMUSG00000104392	Gm37962	16.2322	1.45674	5.43479	1.48052	15.0346	1.47425	9.25965	1.83812	12.0923	1.74531
d	ENSMUSG00000103621	Gm38366	10.4189	1.17633	4.02982	0.918702	9.63089	3.01614	7.85799	1.84779	11.6804	2.44931
d	ENSMUSG00000105286	Gm43140	30.0484	4.59224	11.4973	3.75663	22.2716	4.99271	19.3967	4.92255	23.6814	3.79452
d	ENSMUSG00000107089	Gm43443	7.61664	1.51647	0.801039	0.48921	5.2214	2.82023	2.00895	0.631272	4.45453	1.76058
d	ENSMUSG00000098158	Gm4804	2.00498	1.55358	5.55e-17	0	1.20115	0.48974	0.402048	0.401177	1.62531	0.762358
d	ENSMUSG00000084878	Lrrc8dos	3.20755	1.62842	5.55e-17	0	1.80651	0.861598	0.40651	0.406146	3.45002	1.17973
d	ENSMUSG00000095147	Mir3070a	2.80545	1.02549	0.407991	0.407878	2.80363	1.15487	1.41278	0.404109	3.63394	2.14955
d	ENSMUSG00000081911	Mrps36-ps2	9.22668	2.73243	3.01177	0.625309	7.81971	1.80325	6.64032	1.74074	9.05176	3.25094
d	ENSMUSG00000006289	Osgep	840.927	21.7878	711.919	12.5515	808.254	25.6365	764.677	13.9626	817.165	45.9765
d	ENSMUSG00000068744	Psrc1	498.624	29.9916	417.262	33.2366	507.218	32.7449	478.387	17.179	526.35	10.6826
d	ENSMUSG00000062611	Rps3a2	134.449	7.28426	107.105	5.1808	133.699	8.53708	127.036	5.37273	134.558	14.9862
d	ENSMUSG00000032754	Slc8b1	287.779	27.7479	243.969	18.3926	287.854	11.3764	267.752	8.2868	296.458	15.6179
d	ENSMUSG00000020798	Spns3	13.4202	1.77098	6.8323	1.38691	14.4382	3.15468	10.9038	3.15945	17.3831	2.55475
e	ENSMUSG00000097383	1500026H17Rik	99.3678	5.13645	67.6495	5.46584	84.1993	4.20753	91.974	4.31244	110.721	8.06915
e	ENSMUSG00000097329	4931403G20Rik	3.20311	1.02221	5.55e-17	0	1.60226	0.746935	1.21776	1.21668	2.41988	1.18016
e	ENSMUSG00000055271	9330161L09Rik	15.0262	1.19056	5.84166	1.30916	11.6401	2.34311	16.1283	2.68661	14.7453	0.824152
e	ENSMUSG00000074384	AI429214	177.301	5.28077	144.411	14.6681	177.24	9.54196	187.68	14.3434	197.858	8.64056
e	ENSMUSG00000031725	Ces1f	1.40438	0.981361	5.55e-17	0	1.60512	0.748973	1.6143	0.752031	1.62873	1.18666
e	ENSMUSG00000058952	Cfi	2.79981	1.74273	5.55e-17	0	0.800319	0.489585	0.803206	0.490477	2.41202	0.963363
e	ENSMUSG00000026180	Cxcr2	1.19829	0.798436	5.55e-17	0	1.603	0.748581	2.43023	1.49369	3.17948	3.1673
e	ENSMUSG00000083889	E530001F21Rik	25.6413	2.93769	13.6914	2.14143	23.6553	7.46669	25.811	3.88574	22.8442	5.02383
e	ENSMUSG00000072596	Ear2	4.40493	0.741984	5.55e-17	0	1.60476	0.752491	2.42011	1.16964	3.84286	1.37381
e	ENSMUSG00000029163	Emilin1	131.2	8.38628	97.1608	9.34098	124.057	6.40485	132.074	10.1362	156.054	7.13248
e	ENSMUSG00000017724	Etv4	417.324	27.942	319.488	25.7925	405.615	21.181	411.612	24.4911	439.943	16.6512
e	ENSMUSG00000075510	Fam187a	3.60843	1.47224	5.55e-17	0	2.80575	1.01874	3.23155	1.63837	2.82412	0.805395
e	ENSMUSG00000053593	Fate1	1.20006	0.489351	5.55e-17	0	1.20282	1.20189	1.2147	0.811459	1.62424	0.40613
e	ENSMUSG00000069588	Gm11733	22.8444	3.21815	8.06046	2.6258	18.4487	2.27245	19.9865	3.94205	14.9412	2.76303
e	ENSMUSG00000082476	Gm12242	7.41627	2.09945	5.55e-17	0	3.2074	1.35872	1.60718	0.749807	1.60884	0.753065
e	ENSMUSG00000087430	Gm13405	1.60087	0.39952	5.55e-17	0	1.20253	0.49032	1.60597	1.16663	2.02803	1.1052
e	ENSMUSG00000082036	Gm13724	1.00268	0.634371	5.55e-17	0	3.40928	1.72428	1.204	0.800457	2.00816	1.26042
e	ENSMUSG00000081740	Gm14279	4.40975	2.26088	0.199752	0.199285	1.80463	0.664091	2.01237	1.04778	2.63889	0.758518
e	ENSMUSG00000085568	Gm14858	5.40748	2.60499	1.0113	0.453931	9.21499	2.25506	5.24698	1.75858	8.07849	1.72813
e	ENSMUSG00000085054	Gm15834	22.4259	3.37448	9.65085	2.51048	19.2532	2.95241	18.7472	3.76069	18.3703	4.01662
e	ENSMUSG00000086527	Gm15856	2.40473	0.403136	5.55e-17	0	4.60914	0.74633	1.61795	0.990037	1.6108	0.7511
e	ENSMUSG00000089854	Gm16133	2.00338	0.00467267	5.55e-17	0	1.60398	0.981797	1.21169	0.494273	1.20308	0.802653
e	ENSMUSG00000086499	Gm16217	2.4039	1.47095	5.55e-17	0	1.60142	0.749078	1.2034	1.20053	1.21825	0.496672
e	ENSMUSG00000096330	Gm21976	5.59997	1.71298	2.20371	0.793057	7.61435	2.01092	7.4578	1.46873	6.84754	2.0598
e	ENSMUSG00000076135	Gm24276	2.80411	0.735642	5.55e-17	0	2.20211	1.11049	2.82099	1.02122	2.01328	1.09925
e	ENSMUSG00000103119	Gm37583	3.61025	2.40852	5.55e-17	0	2.00085	1.09508	1.60619	1.16715	2.63027	1.66612
e	ENSMUSG00000102740	Gm37599	0.803515	0.803141	5.55e-17	0	0.803753	0.376592	1.6072	0.67811	2.02291	0.646797
e	ENSMUSG00000064231	Gm5321	1.60207	0.675798	5.55e-17	0	2.00638	1.09685	3.21299	1.98562	1.61716	0.753482
e	ENSMUSG00000081255	Gm5380	2.80508	0.583769	0.199634	0.199166	2.00332	1.14	2.0087	0.89556	4.42897	1.43538
e	ENSMUSG00000098154	Gm5787	0.998815	0.772166	5.55e-17	0	1.40522	0.981495	1.60566	1.16656	1.61332	0.681712
e	ENSMUSG00000063830	Gm6065	1.99887	0.892883	0.200008	0.19954	1.80301	0.914483	2.0096	0.837574	2.01969	0.319897
e	ENSMUSG00000087112	Gm7237	2.20683	0.80385	5.55e-17	0	1.0024	0.63334	2.41058	0.979325	0.807259	0.492529
e	ENSMUSG00000104299	Gm9924	33.4904	7.39363	13.0172	2.69205	24.6654	7.1142	30.3645	12.309	26.8612	2.24389
e	ENSMUSG00000055704	Gm9978	5.60874	1.16699	5.55e-17	0	2.00407	0.632379	1.617	0.759842	3.22421	1.0129
e	ENSMUSG00000023132	Gzma	1.60221	0.746702	5.55e-17	0	2.00104	0.629833	0.803206	0.490477	2.40662	1.16701
e	ENSMUSG00000046589	Lrrc8e	1.20257	0.801937	5.55e-17	0	1.20297	0.801366	1.21447	0.811371	4.03419	1.5596
e	ENSMUSG00000033429	Mcee	773.392	21.6358	548.338	30.6112	631.444	20.1127	651.44	25.1275	630.703	42.5529
e	ENSMUSG00000065491	Mir7b	3.60503	1.29034	5.55e-17	0	1.40492	1.16808	2.00761	0.894147	1.21215	0.380539
e	ENSMUSG00000078365	Mos	3.20945	1.0253	0.399655	0.398722	2.40553	0.398908	4.03301	0.896332	5.65052	2.16373
e	ENSMUSG00000058794	Nfe2	1.60657	0.751163	5.55e-17	0	1.59999	1.16586	1.21145	0.494129	3.62235	1.15909
e	ENSMUSG00000051228	Nyx	63.2813	7.43777	30.1285	2.79792	44.905	3.8047	53.4524	2.32852	43.5987	1.02904
e	ENSMUSG00000066684	Pilrb1	5.00762	1.09521	1.21119	0.494579	6.21461	2.06223	4.24116	1.58027	5.23385	0.945674
e	ENSMUSG00000047347	Tdg-ps	16.4207	2.04638	7.8368	1.05957	15.6303	1.83564	16.1222	1.9518	15.9317	3.58561
e	ENSMUSG00000018752	Tnfsfm13	10.6143	1.59322	2.20822	0.659793	7.82338	2.04272	8.47457	1.18804	10.0957	2.05293
f	ENSMUSG00000053783	1700016K19Rik	78.7309	5.77779	56.5063	3.07788	68.1344	6.38143	84.3367	6.11223	80.9459	8.82422
f	ENSMUSG00000097463	4930448E22Rik	7.01416	0.906167	1.60023	0.744611	3.60769	1.327	6.4571	0.769685	5.22883	1.46919
f	ENSMUSG00000092183	4930515G01Rik	11.416	2.2696	3.40974	0.734048	7.21914	1.02663	11.5279	3.93241	8.47513	0.744967
f	ENSMUSG00000044534	Ackr2	128.492	17.133	94.5064	3.85565	118.293	10.6894	131.935	19.5007	133.949	14.2717
f	ENSMUSG00000047565	Acot10	12.0175	2.6873	5.81295	0.996027	8.62282	1.44262	13.5291	2.5048	13.5	2.32508
f	ENSMUSG00000054932	Afp	6.80004	2.05085	1.20917	0.80077	3.61092	1.33015	4.44134	1.61219	8.8124	4.33225
f	ENSMUSG00000068463	B630019A10Rik	7.61167	0.743855	2.2137	0.663705	3.20864	0.801873	7.65938	1.28511	8.46567	2.57879
f	ENSMUSG00000032033	Barx2	103.437	12.4882	72.4231	9.26837	95.0405	14.0624	114.786	18.808	116.748	11.0307
f	ENSMUSG00000035759	Bbs10	217.618	10.3811	184.223	6.55873	180.734	12.6196	217.001	12.116	229.561	11.5744
f	ENSMUSG00000016758	Bik	4.00398	1.26273	0.400103	0.39917	1.60117	1.16717	2.41019	1.47243	3.63595	0.763952
f	ENSMUSG00000005804	Bloc1s6	1609.13	34.7486	1453.69	40.4648	1533.8	43.5419	1590.53	45.7295	1577.64	31.82
f	ENSMUSG00000009185	Ccl8	0.803515	0.803141	5.55e-17	0	0.603202	0.402426	2.83784	2.36658	4.77689	4.26967
f	ENSMUSG00000040165	Cd209c	3.20969	1.35914	5.55e-17	0	0.601029	0.40008	1.61844	0.990419	1.62643	1.18622
f	ENSMUSG00000044811	Cd300c2	99.3738	7.19434	58.5639	4.35292	73.3694	4.70031	81.2966	7.00652	91.5154	6.21038
f	ENSMUSG00000038181	Chpf2	1692.58	24.3162	1379.53	41.1639	1377.26	41.8113	1563.38	122.435	1595.04	56.0843
f	ENSMUSG00000079450	Cldn34c1	72.1092	8.37583	21.3293	2.73419	25.0602	3.44201	40.4915	3.75932	32.7187	3.74755
f	ENSMUSG00000032436	Cmtm7	75.3044	6.84667	54.0243	7.22224	71.7623	7.28067	78.8362	4.66523	82.7851	17.6183
f	ENSMUSG00000030075	Cntn3	1221.55	38.8211	991.313	30.4792	1025.67	49.3066	1145.57	57.9563	1147.87	80.8456
f	ENSMUSG00000057778	Cyb5d2	620.869	19.0976	541.092	21.7008	598.832	13.9819	617.224	16.7666	630.72	21.9819
f	ENSMUSG00000039384	Dusp10	282.492	17.8716	226.209	17.8487	234.318	20.011	272.384	22.1271	297.518	21.1379
f	ENSMUSG00000071332	E230015B07Rik	5.21229	1.02912	1.20009	0.48796	3.20773	0.490264	4.44875	1.63186	4.03092	1.69098
f	ENSMUSG00000078580	E430018J23Rik	320.699	9.05601	233.294	7.84416	215.952	9.22097	286.354	17.0403	291.376	5.67051
f	ENSMUSG00000029333	ENSMUSG00000029333	1288.41	93.7881	1035.02	66.4457	1007.93	87.0202	1356.27	145.072	1315.61	38.4517
f	ENSMUSG00000102012	ENSMUSG00000102012	2.99978	1.33955	5.55e-17	0	0.601559	0.400728	1.60566	1.16656	1.40661	0.870342
f	ENSMUSG00000103515	ENSMUSG00000103515	229.968	3.24989	140.131	12.2277	137.139	3.57998	169.723	11.8547	185.924	12.3249
f	ENSMUSG00000021675	F2rl2	17.0306	1.50243	7.02309	2.9514	12.6323	1.17338	15.3266	3.5525	14.5515	3.17497
f	ENSMUSG00000031077	Fadd	131.94	10.3434	71.7822	8.33398	80.9811	7.41599	103.481	6.54499	114.735	8.58277
f	ENSMUSG00000081208	Gm11400	29.2304	3.66479	16.1298	3.18147	14.8337	2.7855	25.399	2.10907	28.2662	4.24516
f	ENSMUSG00000081552	Gm12328	5.40775	0.87091	1.99629	1.29816	3.80769	1.90896	7.05667	0.704789	5.25358	0.515749
f	ENSMUSG00000081078	Gm12568	1.00104	0.446625	5.55e-17	0	0.601036	0.400374	1.407	0.750089	2.21981	1.21336
f	ENSMUSG00000083241	Gm13259	3.20802	1.36294	0.200946	0.200535	1.603	0.748581	4.03749	0.651588	3.20408	1.61258
f	ENSMUSG00000087079	Gm13389	1.60482	1.16784	5.55e-17	0	0.400385	0.399998	2.00718	1.54967	2.21842	0.668061
f	ENSMUSG00000084067	Gm14269	166.012	11.541	118.022	3.06207	148.832	16.6065	213.13	28.8845	229.079	47.1262
f	ENSMUSG00000086736	Gm14902	2.00169	1.09192	5.55e-17	0	0.803999	0.492248	1.21198	0.494452	2.02953	0.903091
f	ENSMUSG00000086645	Gm15743	50.4623	4.25001	25.1095	1.01268	30.487	4.86738	41.3649	5.31426	41.3512	2.09772
f	ENSMUSG00000085739	Gm15862	2.80497	1.49551	0.401739	0.400919	2.00953	1.27152	4.03342	0.634002	5.84163	1.25292
f	ENSMUSG00000087135	Gm16096	7.61723	2.25594	1.9978	1.30056	4.01525	1.26996	5.8447	1.15327	6.26423	2.09249
f	ENSMUSG00000086754	Gm16098	0.999485	0.445763	5.55e-17	0	0.201438	0.201367	1.60986	0.926998	1.00935	0.779336
f	ENSMUSG00000107317	Gm19719	28.6557	3.10251	9.03007	1.4491	14.2347	2.15652	17.1232	2.24558	16.9759	4.76794
f	ENSMUSG00000064452	Gm24564	17.6147	5.03469	4.80648	1.75808	8.20548	3.01133	12.9116	3.01248	10.9039	1.21984
f	ENSMUSG00000097507	Gm26538	8.0086	2.092	2.01132	0.630004	3.80602	1.56529	7.68114	2.45199	8.28594	2.60936
f	ENSMUSG00000097015	Gm26705	2.20108	0.662785	0.199752	0.199285	5.55e-17	0	4.42771	1.93616	2.84342	1.21547
f	ENSMUSG00000106683	Gm43263	4.20164	1.52745	5.55e-17	0	0.798935	0.79815	2.41123	1.03077	2.01213	1.22914
f	ENSMUSG00000094685	Gm5900	529.947	28.5806	94.7541	7.99295	112.462	2.36679	131.568	6.95307	122.506	11.9864
f	ENSMUSG00000051548	Gm6365	36.053	3.27787	22.0906	2.83694	29.8754	4.00791	36.6588	3.90286	35.6221	5.0515
f	ENSMUSG00000058470	Gm8369	2.60792	1.8888	0.400103	0.39917	1.1999	0.798305	5.23388	1.19264	6.8266	2.48866
f	ENSMUSG00000083367	Gm8806	202.672	9.82731	166.927	6.16608	181.043	8.33547	200.669	11.216	207.928	11.4806
f	ENSMUSG00000038705	Gmeb2	923.187	12.7403	766.639	27.7179	775.327	14.3186	864.024	45.0972	905.761	37.2996
f	ENSMUSG00000073008	Gpr174	2.7945	2.32537	5.55e-17	0	0.402535	0.402393	2.81991	1.49894	2.02193	0.901777
f	ENSMUSG00000022738	Gsc2	2.00214	0.633181	5.55e-17	0	0.801918	0.801292	1.60597	1.16663	1.99997	1.25582
f	ENSMUSG00000001627	Ifrd1	1302	41.1628	1053.48	20.4982	1138.6	42.7457	1163.51	39.2502	1180.64	35.4697
f	ENSMUSG00000070942	Il1rl2	27.8329	3.05985	12.277	2.1914	18.4471	2.49094	28.6412	2.53721	28.2488	5.24935
f	ENSMUSG00000074890	Lcmt2	291.385	18.1534	200.416	9.04847	216.433	14.021	255.177	33.3612	317.38	19.6365
f	ENSMUSG00000033446	Lpar6	214.3	21.087	94.5047	3.08597	99.0526	4.42289	136.146	10.8724	140.139	14.0045
f	ENSMUSG00000030922	Lyrm1	256.676	12.5877	212.236	11.7172	234.94	4.28594	258.016	11.4619	269.437	13.2834
f	ENSMUSG00000098397	Mir7669	1.60229	0.679477	5.55e-17	0	0.603623	0.60341	1.41047	0.749562	0.81195	0.496176
f	ENSMUSG00000021179	Nrde2	996.197	10.4529	742.873	36.1606	752.524	14.5659	881.698	53.0208	933.682	11.2313
f	ENSMUSG00000050312	Nsun3	470.257	25.5107	336.313	15.3119	361.631	6.45047	419.334	23.0511	397.451	17.892
f	ENSMUSG00000048439	Nupl2	480.419	18.5191	376.949	16.3537	411.472	19.5117	433.605	9.75256	438.743	23.1152
f	ENSMUSG00000036362	P2ry13	656.206	40.7724	495.508	23.7076	553.914	15.1344	586.748	21.8636	589.612	38.8354
f	ENSMUSG00000023452	Pisd	1146.63	13.365	1015.46	29.1774	1088.72	16.5966	1108.59	37.9717	1130.67	43.9952
f	ENSMUSG00000066760	Psg16	121.757	10.2767	92.286	10.7323	109.297	6.86528	128.423	6.71155	123.671	10.6404
f	ENSMUSG00000027864	Ptgfrn	1445.47	58.0282	1114.36	94.2566	1205.65	81.252	1318.45	102.226	1378.85	113.615
f	ENSMUSG00000038546	Ranbp9	3944.14	95.6008	3420.63	190.532	3454.25	105.317	4035.93	192.066	4593.99	41.619
f	ENSMUSG00000023912	Slc25a27	1581.71	29.2152	1435.59	21.2509	1490.33	12.3418	1572.04	57.4704	1638.98	33.3685
f	ENSMUSG00000007034	Slc44a4	14.4294	2.17604	5.19615	2.79111	9.82567	1.99145	13.5118	2.57361	11.3295	2.53046
f	ENSMUSG00000022797	Tfrc	4262.38	196.791	3091.56	99.0916	2907.98	65.8592	3517.77	231.435	3576	88.7843
f	ENSMUSG00000044827	Tlr1	14.8194	1.13372	5.63176	0.527961	9.62112	1.163	12.0908	0.917107	17.0926	3.60817
f	ENSMUSG00000043085	Tmem82	4.60793	0.602276	1.6105	0.402845	3.20589	1.19804	5.04636	1.35935	5.23001	1.33642
f	ENSMUSG00000031481	Tpte	6.00374	2.35831	5.55e-17	0	0.200434	0.200263	1.61653	0.988949	1.20339	0.794184
f	ENSMUSG00000076492	Trbj2-1	6.61276	2.36752	0.599179	0.398191	1.60548	0.678647	3.82916	1.6877	4.81989	1.61766
f	ENSMUSG00000026723	Trdmt1	242.561	10.7752	190.879	11.3574	215.296	5.81823	232.792	19.5402	228.307	5.82036
f	ENSMUSG00000032596	Uba7	111.99	6.96251	83.467	5.54535	102.673	10.3486	106.653	3.16258	115.205	12.2761
f	ENSMUSG00000042851	Zc3h6	1074.63	59.9754	785.082	16.3901	739.79	17.6739	893.988	57.0845	937.29	27.8542
f	ENSMUSG00000042063	Zfp386	1161.12	24.1225	787.585	19.2366	786.068	17.0949	944.159	64.6546	935.314	24.5725
f	ENSMUSG00000060314	Zfp941	1053.58	91.5621	846.747	79.7627	932.829	22.8615	1106.23	78.2195	1070.06	58.3863
g	ENSMUSG00000089889	0610040B10Rik	84.5349	3.5607	44.18	4.26967	38.2808	2.01202	49.0238	7.62363	63.5192	4.68171
g	ENSMUSG00000019797	1700021F05Rik	809.616	15.1483	722.734	25.4519	745.781	32.9533	745.326	29.3505	824.215	30.767
g	ENSMUSG00000092486	2610524H06Rik	435.804	26.1589	285.115	22.7734	286.839	8.02715	334.323	21.9215	372.949	29.6751
g	ENSMUSG00000098090	2700099C18Rik	99.5513	6.79245	68.9386	1.93923	66.982	6.00397	82.1369	8.31716	96.0551	5.23443
g	ENSMUSG00000096995	2810029C07Rik	530.377	16.2698	324.359	19.1235	318.411	11.3181	384.723	46.7109	420.631	19.8717
g	ENSMUSG00000086629	2810403D21Rik	43.8553	6.83286	19.0698	3.32375	23.8458	4.15037	26.8149	2.4813	33.0561	6.73513
g	ENSMUSG00000043993	2900052L18Rik	259.711	21.8366	176.714	15.1316	174.18	8.18465	192.153	21.2179	238.434	22.6752
g	ENSMUSG00000042579	4632404H12Rik	955.171	26.3347	787.886	25.3018	813.209	16.8245	836.527	29.9198	873.535	36.4889
g	ENSMUSG00000074024	4632427E13Rik	162.002	15.4479	100.599	5.74708	91.6523	6.88055	128.682	19.5339	141.525	18.8426
g	ENSMUSG00000097323	4930426I24Rik	16.8215	2.21186	9.02915	2.73145	12.2308	2.77021	14.0953	2.99585	18.7499	2.76589
g	ENSMUSG00000084803	5830444B04Rik	76.1189	8.12672	37.4722	7.2628	31.8778	4.07413	41.9666	4.62693	54.1547	7.99645
g	ENSMUSG00000087022	9130024F11Rik	569.344	80.6055	383.163	31.3958	386.723	44.6032	480.693	88.9398	569.382	51.5981
g	ENSMUSG00000091050	9330020H09Rik	33.847	2.29022	14.858	2.29817	19.8438	1.83582	19.9475	4.06974	31.5652	5.43893
g	ENSMUSG00000102964	9430034N14Rik	7.60689	2.77965	2.01617	0.90381	2.20803	1.12061	6.45925	2.24811	7.42648	3.08469
g	ENSMUSG00000100812	A730098A19Rik	21.0303	1.65384	10.6809	2.35189	13.4336	1.21487	14.5312	3.039	19.7916	3.85309
g	ENSMUSG00000007036	Abhd16a	3638.22	90.2474	3258.35	53.8768	3281.03	83.0378	3281.06	60.6914	3526.6	116.441
g	ENSMUSG00000038836	Agbl3	457.242	18.4787	338.113	21.2576	344.006	8.35344	387	28.028	408.827	22.3406
g	ENSMUSG00000022763	Aifm3	4323.72	131.956	3749.54	166.399	3845.68	153.709	4018.23	313.621	4381.84	235.947
g	ENSMUSG00000032786	Alas1	3188.84	72.0812	2866.88	55.8357	2929.51	68.6415	2970.68	71.2736	3151.38	51.9066
g	ENSMUSG00000025701	Alox5	92.7543	2.36547	28.2949	4.60924	38.3041	3.93098	42.2892	5.23464	48.3702	6.24714
g	ENSMUSG00000037787	Apopt1	722.93	32.7073	600.366	11.7225	620.198	28.7326	596.39	27.3163	690.036	31.5128
g	ENSMUSG00000031389	Arhgap4	280.129	17.0188	234.657	14.5655	254.687	20.7958	244.702	13.9279	282.159	13.3223
g	ENSMUSG00000007656	Arpp19	9612.07	861.321	7256.03	414.162	7276.09	464.941	8023.42	511.492	8883.49	604.599
g	ENSMUSG00000033161	Atp1a1	39659.6	1358.14	35595.1	837.974	36370.3	1528.6	38484.4	2302.95	40176	2097.55
g	ENSMUSG00000001039	B9d1	590.498	12.8668	506.662	15.4622	498.03	10.969	522.899	18.6338	577.6	21.9867
g	ENSMUSG00000030983	Bccip	1832.84	58.231	1636.44	49.1751	1694.95	42.0477	1700.73	36.221	1774.69	56.3509
g	ENSMUSG00000030802	Bckdk	1800.52	34.1719	1571.51	37.7839	1573.61	33.0566	1584.09	54.8846	1736.44	69.472
g	ENSMUSG00000062376	Borcs7	1150.07	15.4662	1008.88	22.2509	1103.38	31.1326	1046.34	30.0061	1125.95	65.0992
g	ENSMUSG00000046679	C87436	975.013	27.6714	883.464	16.3013	923.487	10.5959	919.645	14.2273	973.257	12.4544
g	ENSMUSG00000022833	Ccdc14	136.436	6.58476	103.904	4.80795	107.279	5.26517	114.694	13.9345	135.971	12.9865
g	ENSMUSG00000056018	Ccdc7b	13.0336	3.04977	6.63158	1.36495	9.61796	2.48329	10.2818	0.79301	17.3886	3.0484
g	ENSMUSG00000031971	Ccsap	2741.61	79.2527	2350.87	85.9415	2199.89	62.5625	2484.4	131.214	2640.67	64.0005
g	ENSMUSG00000045273	Cenph	25.2455	5.4686	14.2026	3.70943	12.4286	1.43135	22.1793	1.67516	27.3881	4.512
g	ENSMUSG00000024989	Cep55	17.0341	1.82063	8.2392	1.35232	11.2334	1.37799	12.5157	2.20653	15.903	3.83758
g	ENSMUSG00000008206	Cers4	2642.49	70.8603	2280.13	55.1857	2321.77	63.2969	2472.12	83.1869	2609.72	68.83
g	ENSMUSG00000031283	Chrdl1	315.899	62.5153	222.062	12.2973	242.834	22.1335	286.184	32.588	308.137	36.1302
g	ENSMUSG00000070803	Cited4	221.088	29.7397	139.877	17.8667	147.713	25.1206	166.25	36.7252	256.057	32.1282
g	ENSMUSG00000033467	Crlf2	797.963	22.5501	644.256	18.5702	706.075	24.9329	668.112	49.3515	755.708	29.9135
g	ENSMUSG00000028859	Csf3r	264.227	15.6775	216.203	19.1931	195.67	5.80531	224.505	16.2141	257.111	14.2059
g	ENSMUSG00000021477	Ctsl	4174.26	77.2676	3775.3	59.5443	3956.54	106.213	4056.13	112.106	4137.29	274.819
g	ENSMUSG00000025193	Cutc	258.997	15.8387	207.734	11.9674	229.567	9.32143	230.101	14.8579	251.055	8.47351
g	ENSMUSG00000029154	Cwh43	94.0028	13.3059	61.3024	3.92057	64.1428	3.49786	71.5725	8.32865	87.3895	6.16179
g	ENSMUSG00000052336	Cx3cr1	2297.73	70.8414	1903.74	41.2708	1860.94	31.9949	2132.46	44.9265	2237.24	112.481
g	ENSMUSG00000041623	D11Wsu47e	394.741	13.425	319.728	12.1785	331.478	11.2058	325.602	15.4545	367.733	12.178
g	ENSMUSG00000054405	Dnajc8	4026.34	89.4359	3565.69	54.544	3565.65	70.5765	3743.67	89.1166	3911.96	128.266
g	ENSMUSG00000017299	Dnttip1	716.22	22.3913	648.051	25.1664	659.6	14.5234	702.787	18.7816	721.322	30.4874
g	ENSMUSG00000075419	Dolk	888.638	1.88807	790.62	24.624	856.91	42.3207	856.877	23.1581	916.216	39.757
g	ENSMUSG00000009406	Elk1	3350.7	67.3761	2936.84	101.771	3079.97	56.6377	3108.82	73.5751	3225.21	132.18
g	ENSMUSG00000101828	ENSMUSG00000101828	26.04	1.93616	15.2886	2.61052	12.0246	3.62497	16.5401	1.99364	25.0979	5.46745
g	ENSMUSG00000106744	ENSMUSG00000106744	813.525	17.0557	640.446	24.9917	677.809	30.3165	679.89	29.7424	736.11	19.9731
g	ENSMUSG00000017264	Exosc10	2051.97	25.1448	1871.03	50.1609	1933.71	46.5067	1917.89	55.1339	2116.23	37.8347
g	ENSMUSG00000027752	Exosc8	726.862	12.5254	587.441	27.9694	624.909	3.96664	577.417	48.3429	682.086	21.9954
g	ENSMUSG00000074922	Fam122a	661.695	23.1433	544.676	9.88061	536.209	24.6552	567.102	34.0268	642.959	31.28
g	ENSMUSG00000057411	Fam173a	2394.75	23.7609	2191.92	5.73101	2336.99	62.9794	2187.51	42.244	2469.96	124.4
g	ENSMUSG00000034858	Fam214a	2039.34	56.0809	1672.18	108.389	1551.19	34.8169	1783.29	123.386	1923.82	95.4264
g	ENSMUSG00000036002	Fam214b	1703.85	50.0994	1498.57	40.0659	1610.29	23.3977	1586.65	23.4909	1638.07	35.6663
g	ENSMUSG00000024778	Fas	63.6987	4.60448	33.1689	3.79336	40.3016	1.60324	43.1535	5.64336	55.5371	12.7773
g	ENSMUSG00000037536	Fbxo34	3657.42	93.6336	3084.17	142.303	3089.88	28.0222	3192.97	115.478	3360.25	49.3995
g	ENSMUSG00000029001	Fbxo44	3558.04	103.296	3177.3	132.019	3380.71	31.3874	3332.86	38.0203	3488.92	150.993
g	ENSMUSG00000019773	Fbxo5	70.1367	8.40583	43.6142	2.07539	55.3535	7.01045	56.8616	3.48209	64.2066	4.20295
g	ENSMUSG00000026656	Fcgr2b	218.625	10.3522	57.3843	6.84577	61.329	3.52228	72.0169	6.94537	86.8404	17.1163
g	ENSMUSG00000008136	Fhl2	1526.01	93.0534	1170.27	90.2277	1069.25	39.5032	1168.03	91.555	1362.62	63.4087
g	ENSMUSG00000066116	Gm10154	715.569	12.8242	597.594	27.5147	634.346	19.8585	646.661	50.7385	727.23	69.7422
g	ENSMUSG00000074807	Gm10762	105.736	5.77744	82.5819	5.44975	88.2374	7.86032	89.4501	8.251	107.245	6.33354
g	ENSMUSG00000086020	Gm12239	1.19772	1.19663	5.55e-17	0	0.400793	0.400453	0.401822	0.400926	1.62661	0.994612
g	ENSMUSG00000081615	Gm12539	2.40841	0.752699	5.55e-17	0	0.803999	0.492248	0.402048	0.401177	2.00362	0.88856
g	ENSMUSG00000085693	Gm13371	1.80468	0.919959	5.55e-17	0	0.800755	0.799985	0.602561	0.400774	1.21965	0.497533
g	ENSMUSG00000085261	Gm13814	17.2269	4.07409	8.02066	1.37727	11.2131	4.3631	14.7277	2.26361	20.5684	3.58633
g	ENSMUSG00000084058	Gm15263	2.8026	1.02032	5.55e-17	0	0.803999	0.492248	0.401822	0.400926	1.2131	0.805644
g	ENSMUSG00000086189	Gm15462	6.8059	2.21871	0.810992	0.496673	1.20416	0.804033	3.62355	1.16392	4.42864	0.963884
g	ENSMUSG00000085067	Gm15631	112.983	6.23223	72.4681	5.37686	80.6461	8.9203	93.0433	10.9898	104.696	10.5358
g	ENSMUSG00000085269	Gm15777	70.1057	3.81418	39.6586	4.58412	33.2879	2.74971	46.2325	6.1446	58.0898	2.19543
g	ENSMUSG00000097062	Gm17586	218.784	9.97825	160.416	7.48541	174.457	14.8039	185.037	13.1072	199.51	17.9056
g	ENSMUSG00000097613	Gm17597	38.6557	3.16008	25.9353	2.54253	38.2882	4.49058	34.3173	3.72451	43.5005	4.76476
g	ENSMUSG00000092353	Gm20539	1.80499	0.489944	5.55e-17	0	5.55e-17	0	0.802292	0.800365	1.21923	0.813439
g	ENSMUSG00000097479	Gm26582	19.8309	1.38915	11.6447	1.32435	12.2376	2.0852	17.3702	3.16028	24.664	3.87673
g	ENSMUSG00000097373	Gm26877	5.61775	1.72627	0.407991	0.407878	2.00405	0.895077	2.20924	1.20187	3.22421	1.0129
g	ENSMUSG00000098051	Gm27032	842.86	49.0262	556.361	25.0683	557.601	27.1473	610.394	43.5379	719.243	16.2463
g	ENSMUSG00000103662	Gm34294	6.41434	0.993313	2.419	0.758211	5.80967	1.01425	3.22653	1.36173	8.09214	1.73449
g	ENSMUSG00000094955	Gm3699	17.426	3.07905	8.65803	3.11626	15.02	3.75026	15.1122	2.5969	16.1605	2.80407
g	ENSMUSG00000103723	Gm37095	29.2575	1.98949	14.669	1.18878	20.6447	2.77785	19.5386	3.47655	25.0031	1.62624
g	ENSMUSG00000102275	Gm37144	43.2852	5.13728	23.7305	3.11185	20.4451	2.30175	33.4862	3.79085	35.3802	4.5606
g	ENSMUSG00000097156	Gm3764	2585.92	71.8252	2123.32	81.6013	2230.1	17.4321	2223.01	83.1535	2506.5	95.6546
g	ENSMUSG00000102704	Gm38309	15.4286	1.18588	6.03765	1.42852	11.6292	3.87463	12.9089	1.22234	14.7901	4.56022
g	ENSMUSG00000105939	Gm43322	9.82258	1.76173	3.60677	1.70934	3.60222	2.22058	4.63752	0.8729	10.3067	1.47486
g	ENSMUSG00000105449	Gm43379	100.782	5.29698	59.0631	2.4695	71.933	6.18106	74.0037	7.89596	80.1165	9.44504
g	ENSMUSG00000106290	Gm43429	4.40487	0.975309	5.55e-17	0	5.55e-17	0	5.55e-17	0	1.40406	0.739399
g	ENSMUSG00000104969	Gm43445	75.3343	11.8583	48.9248	5.13586	50.9182	5.0865	51.1964	3.66785	73.1565	11.0291
g	ENSMUSG00000107352	Gm43660	158.496	9.22533	113.95	8.13372	133.527	9.29738	117.598	4.81925	142.601	6.02897
g	ENSMUSG00000106019	Gm43672	292.079	18.06	213.889	9.44644	199.696	8.73335	250.951	17.8212	256.129	21.345
g	ENSMUSG00000083626	Gm4459	364.662	17.0582	278.046	10.371	303.276	16.4062	323.487	9.33659	352.323	16.4317
g	ENSMUSG00000093862	Gm5117	19.422	4.72149	11.4387	2.52979	11.6255	1.5651	15.7237	1.5588	23.7842	3.40731
g	ENSMUSG00000045104	Gm5514	1000.68	26.7655	134.664	12.7673	141.414	10.1822	156.105	12.1839	197.166	21.3959
g	ENSMUSG00000068226	Gm6723	19.622	4.2534	8.24353	2.75932	16.237	3.00878	14.9004	3.96571	16.9332	5.91059
g	ENSMUSG00000082005	Gm7189	1.20205	0.375035	5.55e-17	0	5.55e-17	0	0.402048	0.401177	1.60424	0.917215
g	ENSMUSG00000091814	Gm8050	7.01682	2.12958	5.55e-17	0	0.400385	0.399998	0.402242	0.245707	1.01695	0.643131
g	ENSMUSG00000025450	Gm9752	107.813	12.7832	46.2035	5.98181	46.5141	3.86575	57.4619	4.451	64.0899	7.39306
g	ENSMUSG00000042857	Gm9776	212.331	8.38084	141.46	4.83057	125.507	10.2169	152.361	13.8449	174.671	8.0864
g	ENSMUSG00000009108	Gnat2	16.4167	5.22068	4.41602	1.93188	9.01016	2.22473	8.06801	1.68193	11.688	1.6674
g	ENSMUSG00000042532	Golga7b	5278.83	317.032	4516.8	109.203	4848.65	175.763	4825.97	166.895	5187.93	137.069
g	ENSMUSG00000106864	Gtf3c2	1002.76	24.0295	849.624	41.3741	917.323	35.5639	877.733	32.7511	1005.95	27.6966
g	ENSMUSG00000029208	Guf1	2135.81	35.9605	1647.77	54.6641	1616.95	62.6471	1798.27	75.3891	1893.78	25.819
g	ENSMUSG00000061232	H2-K1	382.015	34.68	232.247	7.60123	218.521	10.8743	235.478	19.4655	426.613	188.579
g	ENSMUSG00000016559	H3f3b	8374.2	168.745	6885.26	107.441	6677.63	183.373	7316.46	332.762	7712.95	200.664
g	ENSMUSG00000002833	Hdgfl2	3749.34	114.421	3446	133.778	3489.24	75.0306	3395.45	83.9166	3766.7	46.9617
g	ENSMUSG00000032579	Hemk1	688.88	22.3765	556.788	18.992	568.162	19.8879	579.967	13.4178	637.563	31.4767
g	ENSMUSG00000032744	Heyl	195.481	15.0806	144.433	6.71588	143.527	17.8397	174.211	7.14277	194.502	24.4658
g	ENSMUSG00000020644	Id2	4112.76	227.434	3043.1	94.4111	3052.71	145.341	3259.87	203.594	3714.62	196.863
g	ENSMUSG00000030541	Idh2	1899.69	52.3837	1586.1	25.6865	1640.09	15.9734	1571.49	46.814	1769.49	141.834
g	ENSMUSG00000002010	Idh3g	5423.18	131.177	4939.67	84.8217	5248.12	113.23	5126.62	115.921	5351.07	161.413
g	ENSMUSG00000030330	Ing4	1847.46	28.6651	1674.91	39.1217	1749.03	49.8222	1769.07	23.429	1867.24	46.8904
g	ENSMUSG00000046380	Jrk	565.481	6.63999	448.578	20.3166	440.316	30.174	501.287	34.3767	531.304	21.9811
g	ENSMUSG00000071076	Jund	4216.09	90.5703	3775.71	98.4666	3815.34	94.937	3761.66	103.908	4175.65	147.271
g	ENSMUSG00000033182	Kbtbd12	15.631	2.39643	7.25564	1.55318	9.61993	3.19186	7.07289	1.83874	14.5053	2.78142
g	ENSMUSG00000019761	Krt10	318.901	11.3533	247.3	13.5341	246.784	13.2909	263.46	14.781	304.749	39.6075
g	ENSMUSG00000027968	Larp7	974.915	15.8089	780.845	39.0519	848.891	16.3748	801.427	21.3209	907.097	42.4163
g	ENSMUSG00000043432	Leng9	346.71	11.916	279.725	13.4142	271.225	9.6315	297.661	17.7847	333.398	16.6712
g	ENSMUSG00000021190	Lgmn	5349.92	121.856	4606.87	95.2195	4770.5	75.6085	4762.89	86.3216	5307.09	456.763
g	ENSMUSG00000028266	Lmo4	8709.32	455.504	7394.03	289.049	7711.68	500.792	7808.56	189.999	9057.01	393.579
g	ENSMUSG00000027286	Lrrc57	1155.71	49.7936	1001.73	27.3992	1007.09	15.8808	1102.8	37.7049	1122.01	43.7544
g	ENSMUSG00000073412	Lst1	60.9258	5.32733	36.5884	3.7123	45.9005	3.60937	42.1131	3.14659	53.3751	9.90464
g	ENSMUSG00000004864	Mapk13	33.0444	6.75757	15.9168	3.44437	26.2832	4.83334	23.557	2.82958	28.3961	5.4567
g	ENSMUSG00000042814	Mcts2	321.68	15.9979	252.454	16.065	295.256	8.64507	279.166	15.4184	318.498	19.0367
g	ENSMUSG00000002329	Mdp1	1889.48	45.7526	1704.52	33.2364	1794.68	18.7699	1758.26	42.8678	1841.4	48.7274
g	ENSMUSG00000100252	Mir124-2hg	2199.49	117.721	1861.74	106.456	2055.35	122.555	2104.87	114.067	2257.93	65.0872
g	ENSMUSG00000065564	Mirlet7b	51.0908	6.62933	24.3928	6.16289	31.0868	3.47487	32.3351	7.47294	42.639	4.44966
g	ENSMUSG00000032355	Mlip	1377.23	76.3587	839.798	34.7252	844.538	43.5584	930.15	102.519	1072.27	103.416
g	ENSMUSG00000018858	Mrpl58	1636.48	41.9929	1452.3	34.2934	1516.66	48.6849	1528.01	28.1396	1638.26	62.7961
g	ENSMUSG00000024906	Mus81	1090.5	49.2081	984.14	23.5405	1022.36	15.4348	974.907	37.2663	1091.67	23.6629
g	ENSMUSG00000034868	Myl12b	8612.45	178.403	7485.22	69.6228	7779.2	215.971	7705.16	54.976	8077.43	224.773
g	ENSMUSG00000032298	Neil1	401.405	13.4101	332.739	16.6275	362.098	12.319	359.697	27.1386	387.218	11.8997
g	ENSMUSG00000013465	Nelfb	2424.17	46.5384	2205.09	52.5664	2252.87	54.9677	2301.59	41.8922	2389.18	62.0332
g	ENSMUSG00000032109	Nlrx1	414.116	16.4453	322.329	22.9741	335.698	12.8975	358.77	19.1612	403.529	17.6676
g	ENSMUSG00000041560	Nop53	4303.13	107.291	3739.42	52.7275	3699.09	61.7209	3690.71	125.913	4143.04	266.365
g	ENSMUSG00000022809	Nr1i2	2.00117	1.26384	5.55e-17	0	0.402535	0.402393	1.21447	0.811371	2.42079	1.47711
g	ENSMUSG00000070520	Nsmce3	1549.42	44.5218	1327.13	32.2105	1402.71	68.8112	1446.14	48.3435	1553.57	51.7916
g	ENSMUSG00000032014	Oaf	505.208	28.1068	428.014	15.3387	474.635	20.2611	439.359	12.6205	518.448	29.5111
g	ENSMUSG00000045620	Odf3l1	3.00407	1.00154	0.399655	0.398722	0.603356	0.402483	1.20517	0.801519	3.23166	1.36771
g	ENSMUSG00000030271	Ogg1	271.04	14.1388	234.15	19.3835	243.768	3.57104	259.982	7.05384	273.834	5.903
g	ENSMUSG00000096169	Olfr1564	2.00586	0.633577	5.55e-17	0	0.399403	0.399008	0.40118	0.40021	2.41631	0.744149
g	ENSMUSG00000000959	Oxa1l	2110.59	19.7558	1935.99	42.874	1980.56	64.4653	1971.15	32.3694	2074.46	53.284
g	ENSMUSG00000069678	Pcgf1	544.732	23.9741	467.953	13.5472	476.985	12.2545	499.58	13.8297	546.127	21.2644
g	ENSMUSG00000020808	Pimreg	15.8343	3.02282	8.07416	2.63603	11.8291	3.01041	14.7276	3.14738	15.3437	2.76157
g	ENSMUSG00000034579	Pla2g3	160.685	10.5395	110.992	11.1082	119.098	10.933	142.607	9.74929	166.8	12.396
g	ENSMUSG00000040428	Plekha4	123.506	16.8533	66.8832	5.71399	64.5876	7.00704	82.3895	14.1714	90.0781	9.06858
g	ENSMUSG00000028099	Polr3c	699.52	17.0075	612.008	10.3738	660.704	28.109	674.729	10.749	715.088	22.0474
g	ENSMUSG00000028104	Polr3gl	742.918	14.6838	659.629	16.079	685.841	30.2292	699.809	32.0394	766.975	17.5873
g	ENSMUSG00000029715	Pop7	667.385	22.0707	567.469	15.7175	627.621	24.3172	580.085	30.3123	661.271	48.3868
g	ENSMUSG00000039476	Prrx2	48.3111	5.78068	33.511	4.0416	46.7111	1.14805	43.3116	6.59893	51.2652	5.26631
g	ENSMUSG00000063179	Pstk	749.134	18.8048	635.423	21.5963	631.428	14.3135	673.546	35.6461	760.423	37.3724
g	ENSMUSG00000015090	Ptgds	22883	2827.09	11846.6	1773.95	12436.2	1877.76	13421.6	711.514	15761	1947.73
g	ENSMUSG00000032487	Ptgs2	900.039	62.5475	642.515	22.7085	646.201	28.9521	771.483	44.4236	817.839	37.5178
g	ENSMUSG00000004266	Ptpn6	160.807	7.76373	108.302	11.2333	136.061	9.83535	142.773	9.22621	183.541	48.5604
g	ENSMUSG00000072582	Ptrh2	709.039	22.1345	629.735	21.1549	616.286	11.292	657.303	22.5554	704.416	33.5064
g	ENSMUSG00000064030	Pym1	816.211	18.5757	698.017	14.4555	718.253	21.9915	705.432	37.6705	802.65	47.6119
g	ENSMUSG00000030359	Pzp	28.2322	5.17778	7.23357	2.30658	14.0433	3.01098	14.0867	5.70706	17.5642	4.41567
g	ENSMUSG00000077450	Rab11b	5289.34	38.1838	4078.91	18.8566	4144.47	35.2563	4011.51	47.8378	4343.69	63.1135
g	ENSMUSG00000034789	Rab24	2784.56	50.7081	2397.96	48.1522	2539.84	43.9505	2455.6	63.05	2678.53	135.821
g	ENSMUSG00000030346	Rad51ap1	84.9628	3.84064	58.3557	5.25952	73.005	5.19896	65.9242	5.71748	78.0665	7.03549
g	ENSMUSG00000021428	Riok1	674.81	22.4016	598.757	21.753	609.802	18.9118	640.302	14.8271	676.647	22.0155
g	ENSMUSG00000040746	Rnf167	3107.95	55.7541	2808.67	85.8174	2850.38	55.898	2931.67	83.6652	3050.06	51.7344
g	ENSMUSG00000091086	Rpl6l	755.741	21.6414	664.329	19.9142	703.537	30.7331	698.379	14.1241	749.672	58.4411
g	ENSMUSG00000028871	Rspo1	276.284	20.3462	186.434	23.9616	220.275	16.1351	215.543	42.779	269.158	32.1797
g	ENSMUSG00000092607	Scnm1	781.083	5.20687	676.002	23.685	753.253	26.7512	733.284	38.5411	763.799	40.713
g	ENSMUSG00000030714	Sgf29	411.541	10.761	355.541	16.4918	381.532	20.2849	387.764	9.96965	421.992	17.8383
g	ENSMUSG00000059013	Sh2d3c	1168.91	27.8074	932.008	46.079	967.672	23.1021	996.114	86.4	1069.35	61.4209
g	ENSMUSG00000046460	Sh2d7	4.8049	0.793677	0.999449	0.444538	2.80273	1.02007	3.64336	1.96847	5.24051	1.76157
g	ENSMUSG00000017756	Slc12a7	236.533	24.1639	187.834	18.1878	197.623	16.7015	207.355	11.5802	234.453	17.2503
g	ENSMUSG00000031808	Slc27a1	3613.15	108.395	3170.27	72.6709	3153.43	20.7324	3194.45	77.4834	3499.09	104.533
g	ENSMUSG00000019872	Smpdl3a	1107.19	65.4064	941.174	29.6414	961.768	24.7558	988.051	28.1094	1058.82	50.5029
g	ENSMUSG00000086859	Snhg20	843.788	14.1524	637.672	8.80689	644.177	22.2513	672.494	46.5468	763.3	47.1827
g	ENSMUSG00000089255	Snora78	12.0192	2.44715	6.0366	1.80525	5.61817	2.07285	7.87266	1.01004	12.9195	3.21684
g	ENSMUSG00000080486	Snord100	11.4189	2.02168	2.62515	0.94583	4.61283	2.48129	4.43	0.667778	9.08145	1.22627
g	ENSMUSG00000030512	Snrpa1	1068.58	17.0913	945.792	15.8603	946.529	15.4306	959.291	38.6958	1055.01	55.0913
g	ENSMUSG00000018678	Sp2	676.852	37.9009	534.584	28.1942	536.095	25.9967	583.878	35.7772	636.657	34.3909
g	ENSMUSG00000031216	Stard8	664.926	32.3523	502.466	28.8268	581.906	58.4242	631.47	85.3427	638.116	84.0688
g	ENSMUSG00000022414	Tab1	1238.86	34.7842	982.41	13.7877	994.669	35.7603	1064.27	34.4988	1090.17	35.9297
g	ENSMUSG00000024308	Tapbp	1188.68	27.364	955.334	20.0131	963.537	40.0099	973.287	28.2874	1135.25	61.8815
g	ENSMUSG00000038520	Tbc1d17	2086.67	35.7972	1903.53	44.8834	2020.86	45.7809	1986.37	81.6902	2079.83	52.525
g	ENSMUSG00000036430	Tbcc	1008.54	23.6766	869.899	21.8555	830.584	51.9524	915.766	38.2781	1013.3	60.7523
g	ENSMUSG00000011114	Tbrg1	2197.38	41.5894	1979.77	24.1761	2017	36.9237	2033.76	22.5942	2142.45	52.8642
g	ENSMUSG00000049625	Tifab	108.566	3.69826	75.7894	10.065	88.5633	10.494	95.0621	12.1891	112.709	14.3184
g	ENSMUSG00000035762	Tmem161b	794.079	31.7217	666.652	31.1187	675.454	19.2967	701.556	29.3049	746.45	34.7337
g	ENSMUSG00000060538	Tmem219	226.519	6.72295	187.82	8.50746	203.333	13.5116	214.144	23.5727	229.413	11.829
g	ENSMUSG00000027341	Tmem230	716.637	14.8652	634.764	12.6182	665.747	27.3845	690.445	20.2963	725.588	36.744
g	ENSMUSG00000028797	Tmem234	2660.79	71.8647	2372.09	23.3823	2500.99	64.8756	2436.84	47.96	2627.57	129.657
g	ENSMUSG00000022537	Tmem44	1717.7	127.919	1454.4	72.7806	1525.41	96.6949	1637.84	76.6783	1761.6	51.7531
g	ENSMUSG00000010307	Tmem86a	702.487	32.9059	560.194	38.7393	619.851	8.57278	631.742	33.4664	680.067	39.2507
g	ENSMUSG00000010142	Tnfrsf13b	83.3693	6.09243	47.8714	5.84434	43.6802	4.36657	62.538	8.51894	80.2606	10.4025
g	ENSMUSG00000006764	Tph2	49.5018	8.71707	32.8826	6.02721	36.6754	5.24979	40.5748	6.21164	50.4897	6.36476
g	ENSMUSG00000021569	Trip13	24.0407	3.15697	14.6723	1.50478	19.242	2.30045	19.3598	0.995957	26.3935	2.81687
g	ENSMUSG00000031997	Trpc6	566.002	47.1099	375.387	36.0084	373.714	13.5719	436.455	26.8759	462.629	39.4794
g	ENSMUSG00000033790	Tubgcp5	1759	86.3189	1569.97	43.7547	1546.72	26.4408	1642.03	40.1817	1718.7	24.237
g	ENSMUSG00000032010	Usp2	3008.27	101.577	2478.89	106.702	2392.68	92.1224	2695.26	156.866	2928.47	77.7831
g	ENSMUSG00000001062	Vps9d1	2599.64	75.7463	2352.84	103.395	2443.01	29.6058	2412.05	98.6045	2608.33	20.0254
g	ENSMUSG00000039382	Wdr45	1821.21	45.0316	1678.83	35.2902	1668.32	31.7711	1684.05	35.0399	1843.85	54.3719
g	ENSMUSG00000027242	Wdr76	264.45	10.3509	220.992	10.044	240.164	10.5742	248.651	7.6793	264.132	15.0062
g	ENSMUSG00000000126	Wnt9a	780.749	74.3394	604.288	22.6317	600.719	54.2658	655.423	33.448	743.262	51.5008
g	ENSMUSG00000024875	Yif1a	578.733	22.1956	453.91	20.2618	463.855	8.69579	517.215	13.2374	540.525	35.4549
g	ENSMUSG00000034059	Ypel4	2580.63	66.3358	2331.4	48.2699	2468.5	88.1303	2411.38	113.773	2624.76	63.2454
g	ENSMUSG00000028807	Zbtb8a	180.08	9.04934	139.912	12.8953	140.495	6.37465	158.648	12.2183	177.353	8.91918
g	ENSMUSG00000025470	Zfp511	523.723	20.8404	398.709	19.5823	442.403	15.2971	405.462	21.3213	468.286	17.976
g	ENSMUSG00000038895	Zfp653	772.359	14.1413	693.583	39.5079	722.598	18.8551	687.241	28.452	794.868	27.5481
g	ENSMUSG00000043290	Zfp784	210.708	9.76739	175.091	7.35095	183.833	6.06244	201.875	5.85212	208.903	8.55576
g	ENSMUSG00000098905	Zfp953	50.6664	5.05064	13.0716	3.00614	15.2415	1.76325	19.5396	2.57723	23.4037	2.12073
g	ENSMUSG00000035868	Zfp983	268.632	8.1581	216.81	9.80575	250.199	13.5066	251.651	15.4342	261.85	20.221

## Sheet: Recov_revV
			SAMR1/water		SAMP8/water		SAMP8/KS		SAMP8/NKS		SAMP8/HJG
Category	Gene_ID	Gene_name	AVG	SEM	AVG	SEM	AVG	SEM	AVG	SEM	AVG	SEM
h	ENSMUSG00000028009	1700061I17Rik	0.4008	0.400488	12.5022	3.56447	5.60839	1.35717	9.0777	2.20798	11.294	2.47517
h	ENSMUSG00000100872	1700065J18Rik	5.21086	2.05721	14.9325	4.03302	5.21643	2.57827	8.45482	1.81858	6.45692	1.6042
h	ENSMUSG00000073730	4933415F23Rik	5.55e-17	0	1.20102	0.488338	5.55e-17	0	0.803418	0.49064	2.8255	1.0291
h	ENSMUSG00000106219	5830416I19Rik	5.55e-17	0	2.02273	1.28381	5.55e-17	0	1.2147	0.811459	0.397069	0.395481
h	ENSMUSG00000027483	Bpifa1	5.55e-17	0	1.60906	1.16356	5.55e-17	0	0.40118	0.40021	0.807918	0.493039
h	ENSMUSG00000057802	Gm10030	12.0257	3.65274	38.164	5.5616	23.8703	3.73063	30.4234	3.78848	33.2525	3.75497
h	ENSMUSG00000062561	Gm10118	64.6989	6.25722	87.7846	4.38039	61.7504	4.62353	90.1113	6.00409	103.799	9.99121
h	ENSMUSG00000073130	Gm1141	8.01007	1.08597	21.9384	3.88852	10.4226	1.159	20.9551	2.0105	16.3519	3.38833
h	ENSMUSG00000085914	Gm14320	3.6043	0.50613	8.04036	0.6323	2.20926	0.668138	6.84892	1.49126	8.45187	2.11936
h	ENSMUSG00000083582	Gm15393	5.55e-17	0	1.39901	0.744615	5.55e-17	0	0.405231	0.247984	0.807259	0.492529
h	ENSMUSG00000093384	Gm20689	53.4776	4.89176	78.3589	8.37816	50.5006	4.1747	72.1339	7.01454	63.6097	2.72732
h	ENSMUSG00000065232	Gm22973	0.602081	0.400808	3.4011	1.24617	0.800061	0.489385	2.42374	0.415476	1.62761	0.76305
h	ENSMUSG00000094565	Gm25229	5.55e-17	0	1.21539	0.814159	5.55e-17	0	1.01235	0.641074	0.605706	0.401786
h	ENSMUSG00000065343	Gm25580	5.55e-17	0	3.59863	1.71315	5.55e-17	0	0.601998	0.600579	1.21077	1.20694
h	ENSMUSG00000097237	Gm26519	5.40408	2.03764	12.2444	2.25654	4.81289	1.50362	11.4764	2.58335	8.45826	1.8146
h	ENSMUSG00000097472	Gm26586	0.599805	0.599253	3.63505	1.3593	0.601467	0.600996	1.20598	0.490671	3.03384	0.467234
h	ENSMUSG00000104035	Gm37774	5.55e-17	0	8.42089	2.09016	3.20806	1.77323	9.06601	1.07642	8.68471	1.34997
h	ENSMUSG00000096177	Gm5070	5.55e-17	0	0.800081	0.372246	5.55e-17	0	1.4104	0.678989	1.0086	0.551628
h	ENSMUSG00000092269	Gm9577	5.55e-17	0	2.21579	0.667841	5.55e-17	0	0.40651	0.406146	1.19233	1.18763
h	ENSMUSG00000064267	Hvcn1	25.6461	2.0858	39.4125	3.79032	24.2446	3.09213	31.263	5.22864	26.7545	5.31895
h	ENSMUSG00000030789	Itgax	13.2081	3.73362	38.2109	2.09383	24.6554	2.62861	32.8626	1.29861	31.4932	1.03692
h	ENSMUSG00000026961	Lrrc26	82.1681	6.87463	110.839	8.37444	80.398	10.7247	102.331	8.74277	110.378	9.76651
h	ENSMUSG00000030188	Magohb	209.578	7.19726	311.768	14.9486	269.655	8.86663	300.211	14.4484	334.622	21.8884
h	ENSMUSG00000028862	Map3k6	57.8521	8.38195	89.5979	13.2467	58.9311	5.04078	65.2894	7.58283	65.7864	7.20006
h	ENSMUSG00000020212	Mdm1	244.159	13.5625	305.985	12.8634	256.832	15.0495	266.638	9.68066	276.333	17.3415
h	ENSMUSG00000038736	Nudcd1	514.167	17.3889	758.621	18.1888	678.377	25.2957	751.26	22.8959	736.898	20.1444
h	ENSMUSG00000050511	Oprd1	686.47	32.1604	805.626	39.331	685.396	12.6496	770.635	33.8218	735.865	62.303
h	ENSMUSG00000041482	Piezo2	36.8704	10.3275	91.8449	18.3137	50.288	5.93989	81.046	3.67567	65.9448	5.09127
h	ENSMUSG00000082981	Polr2k-ps	5.55e-17	0	1.61306	0.751877	5.55e-17	0	1.8187	0.926016	1.62341	1.17647
h	ENSMUSG00000057465	Saa2	5.55e-17	0	0.799106	0.487837	5.55e-17	0	0.802292	0.800365	2.39134	1.91728
h	ENSMUSG00000020600	Slc7a15	1.60212	0.509276	6.24385	1.87633	2.00525	0.550384	3.42568	1.02774	3.60932	1.45441
i	ENSMUSG00000029695	Aass	182.344	8.02266	226.901	3.96127	172.809	6.86358	186.273	12.8	209.042	3.11824
i	ENSMUSG00000038729	Akap2	6.00548	1.57382	14.0483	3.94799	6.22105	1.97609	5.45808	1.73201	6.83774	2.21668
i	ENSMUSG00000089958	Gm16165	5.55e-17	0	1.61609	0.762715	5.55e-17	0	5.55e-17	0	1.61716	0.753482
i	ENSMUSG00000056078	Lipm	4.41032	1.83627	14.8524	6.33739	4.40705	1.71852	5.02928	1.17671	7.28273	2.18091
i	ENSMUSG00000063268	Parp10	116.429	8.97803	143.458	9.96583	116.503	7.64607	114.52	4.66664	147.557	10.2404
i	ENSMUSG00000062818	Vmn1r51	5.55e-17	0	1.60831	0.747623	5.55e-17	0	5.55e-17	0	0.606397	0.604563
j	ENSMUSG00000000028	Cdc45	60.0782	6.06666	84.9818	8.35388	86.0006	7.98255	66.4897	6.52724	90.5177	5.55198
j	ENSMUSG00000000731	Aire	10.42	2.43382	20.0973	4.34005	15.6456	4.36684	11.0878	1.41091	21.138	3.58556
j	ENSMUSG00000003341	Atp8b3	16.8233	4.99755	29.1884	3.05054	29.2916	4.14371	15.7417	3.22755	17.3155	3.0117
j	ENSMUSG00000004707	Ly9	6.20779	2.10852	13.2576	3.53202	10.637	2.96111	5.04796	0.804362	13.6679	4.39603
j	ENSMUSG00000009941	Nxf2	2.40153	0.745008	9.63239	1.28543	4.41302	0.756026	3.63184	1.72768	6.06672	2.12147
j	ENSMUSG00000014030	Pax5	5.20504	1.01527	15.6846	2.49671	8.82812	2.67479	5.2507	1.88058	10.0718	2.82588
j	ENSMUSG00000019774	Mtrf1l	241.604	5.4374	381.249	26.4689	362.212	17.0178	309.789	19.8749	353.329	19.0396
j	ENSMUSG00000019996	Map7	3976.3	79.0536	4528.01	152.793	4282.29	133.258	4161.97	56.4717	4194.58	67.2448
j	ENSMUSG00000020087	Tysnd1	831.479	10.7425	910.567	25.5398	911.111	22.1623	829.487	13.086	838.856	24.1281
j	ENSMUSG00000021265	Slc25a29	559.031	11.9955	682.094	11.9734	701.968	19.0434	599.197	36.0696	616.901	28.8797
j	ENSMUSG00000022048	Dpysl2	6163.8	170.505	7390.02	158.051	7559.1	232.22	6398.85	95.3528	7083.59	178.747
j	ENSMUSG00000022185	Acin1	4619.25	52.586	5674.7	199.577	5572.45	34.3048	5093.46	143.043	5257.53	241.099
j	ENSMUSG00000024114	Prss41	139.569	7.52526	171.151	7.37727	166.157	7.33781	132.022	5.75297	162.118	7.63082
j	ENSMUSG00000024312	Wdr46	493.043	20.9154	583.008	17.0057	550.65	13.4947	510.276	21.0126	519.789	15.5791
j	ENSMUSG00000024826	Dpf2	2236.56	63.8379	2503.74	71.1574	2538.68	90.7153	2293.74	57.4938	2381.65	25.0334
j	ENSMUSG00000024905	Tesmin	4.80724	1.358	9.83637	1.36588	5.8099	1.27754	4.24069	1.37303	6.88449	1.39619
j	ENSMUSG00000026627	Tmem206	434.089	15.4125	491.013	12.1051	493.748	13.8355	429.05	12.3888	443.664	5.54385
j	ENSMUSG00000027510	Rbm38	83.3605	4.79572	116.944	14.0464	114.32	10.9778	79.4076	4.03275	99.3105	9.15731
j	ENSMUSG00000028795	Ccdc28b	466.798	21.0826	551.199	29.2334	523.097	7.02311	469.507	21.8937	496.231	33.2681
j	ENSMUSG00000029603	Dtx1	4405.77	106.295	4873.71	75.9919	4907.16	90.8119	4493.3	95.2335	4769.21	149.411
j	ENSMUSG00000029755	Dlx5	169.615	20.0769	225.368	14.2908	173.065	15.3911	168.884	9.16233	187.708	16.1644
j	ENSMUSG00000031150	Ccdc120	483.397	23.4245	583.907	4.92084	584.432	10.3859	515.23	18.0188	533.102	27.8589
j	ENSMUSG00000031493	Ggn	39.4745	2.33852	59.5622	5.14586	51.9524	5.13347	41.3129	4.84931	49.8498	5.01647
j	ENSMUSG00000033669	Zfp7	306.93	9.92324	369.112	12.4688	337.862	12.1568	312.702	20.5657	345.846	17.0472
j	ENSMUSG00000035629	Rubcn	3569.9	45.5486	4427.81	59.1802	4393.51	40.2843	4121.38	88.4101	4224.54	161.45
j	ENSMUSG00000036390	Gadd45a	195.003	22.3149	248.167	25.4326	247.469	20.2159	187.803	23.823	199.246	16.5489
j	ENSMUSG00000037973	Ccdc129	55.5211	5.12425	82.5423	11.4933	69.7635	2.89448	60.468	4.87023	71.7693	7.78895
j	ENSMUSG00000038456	Dennd2a	1403.94	18.0647	1559.75	42.1152	1489.56	39.1871	1415.64	36.7661	1451.94	36.1753
j	ENSMUSG00000038797	Zscan2	367.994	29.9081	429.384	12.4792	401.113	15.8988	368.968	16.3062	403.266	7.71062
j	ENSMUSG00000040447	Spns2	2819.89	71.7311	3190.67	169.738	3118.29	91.0443	2815.6	61.0825	2927.66	72.4215
j	ENSMUSG00000040502	43168	1398.96	30.3437	1601.35	17.516	1543.46	65.1615	1452.58	58.671	1513.09	31.9359
j	ENSMUSG00000041609	Bicdl1	2345.77	54.8221	2789.35	92.6154	2917.81	78.1171	2516.82	59.2612	2638	58.7794
j	ENSMUSG00000045515	Pou3f3	6354.59	208.013	7131.18	419.464	6835.81	114.166	6267.98	175.655	6687.24	263.089
j	ENSMUSG00000045915	Ccdc42	27.4572	2.69108	45.382	6.78229	41.8791	5.12945	29.1896	4.43725	40.6109	3.19607
j	ENSMUSG00000046731	Kctd11	75.2816	5.9368	96.0597	4.1641	87.0159	7.47654	75.819	4.80042	84.6599	5.37828
j	ENSMUSG00000047509	Gm6776	7.61701	1.81155	16.3274	4.291	9.83363	2.37843	6.85746	1.99187	12.0923	2.11599
j	ENSMUSG00000048170	Mcmbp	1143.33	23.4031	1249.8	26.0744	1217.05	18.6588	1141.77	40.7966	1172.78	12.3554
j	ENSMUSG00000050144	Slc25a44	4801.13	66.558	5228.01	44.4026	5068.32	75.9776	4908.5	88.5775	4966.98	151.196
j	ENSMUSG00000051832	E230016K23Rik	5.55e-17	0	2.39595	1.59291	1.20635	0.804692	5.55e-17	0	1.61395	0.40259
j	ENSMUSG00000059898	Dsc3	21.2398	4.05261	54.4668	23.5438	33.476	4.30014	28.9639	7.67698	31.8506	9.11862
j	ENSMUSG00000063888	Rpl7l1	1780.93	38.9161	1917.52	10.8631	1917.65	24.3556	1785.65	36.2799	1789.92	45.2026
j	ENSMUSG00000071005	Ccl19	13.8204	3.92987	72.9944	21.5663	49.0859	20.3678	23.6656	11.4576	71.8907	8.02073
j	ENSMUSG00000073394	Runx2os1	0.401438	0.401199	7.65717	2.09468	4.41193	1.94656	2.22354	1.03298	10.478	1.55614
j	ENSMUSG00000078235	Fam43b	829.448	47.9836	1070.24	40.3116	1060.23	36.0535	917.753	47.4314	987.658	20.3217
j	ENSMUSG00000083914	Rps18-ps1	0.4008	0.400488	14.0362	2.22835	9.2154	1.8386	6.46594	1.51344	12.077	2.60183
j	ENSMUSG00000084899	Gm15344	26.2619	5.97349	41.8853	5.62743	41.9005	3.41537	19.3513	1.94275	29.7004	2.72572
j	ENSMUSG00000084917	Gm17477	14.0295	2.69766	26.2728	4.2337	25.2714	2.54451	13.4968	1.97114	17.4956	5.20396
j	ENSMUSG00000095564	Gm20474	1.20026	0.800333	4.62745	0.935153	5.62158	2.24585	1.61264	0.750168	6.65755	1.73332
j	ENSMUSG00000095675	Ccl21b	5.55e-17	0	1.19915	0.579687	0.59917	0.59858	5.55e-17	0	1.01085	0.450156
j	ENSMUSG00000097889	Gm26541	35.8711	3.87344	52.3076	4.42024	44.8944	4.85858	36.8485	4.95043	41.5779	2.68681
j	ENSMUSG00000102300	Gm34106	1.40373	0.749821	5.01459	1.98769	4.40732	1.02604	1.60686	0.929035	2.00669	0.891474
j	ENSMUSG00000102698	Gm37777	5.55e-17	0	1.60816	0.747278	0.400385	0.399998	5.55e-17	0	1.20339	0.794184
j	ENSMUSG00000104988	Gm43622	0.199487	0.199302	27.1283	3.1569	27.2803	5.27304	17.5584	1.6294	26.0491	1.3611
j	ENSMUSG00000105003	Gm40055	3.20936	1.62932	9.64423	0.730984	6.01604	0.638034	3.62788	1.32866	6.87519	2.96517
k	ENSMUSG00000026208	Des	75.5144	5.53662	97.7056	5.14601	73.9787	3.66388	90.1071	4.9859	69.7423	7.72186
k	ENSMUSG00000074802	Gas2l3	111.188	3.58452	145.875	9.92071	116.516	11.0795	130.786	10.7834	108.746	8.15222
k	ENSMUSG00000036819	Jmjd4	1633.43	29.901	1790.05	27.2617	1656.55	31.9154	1702.8	39.7994	1576.02	45.0303
k	ENSMUSG00000033847	Pla2g4c	6.81699	2.34814	18.3408	3.43216	6.41275	0.970361	10.4907	2.13089	9.70227	1.21036
k	ENSMUSG00000030402	Ppm1n	0.802488	0.491128	7.23563	2.05566	1.20606	0.804584	6.03763	2.09376	1.20304	0.488503
k	ENSMUSG00000028896	Rcc1	496.663	13.1687	560.591	16.2749	494.123	17.6646	497.973	15.8517	461.048	19.7838
k	ENSMUSG00000024173	Tpsab1	1.80686	0.802088	8.2259	4.01172	2.00834	1.55811	6.84285	3.43987	2.01932	0.0163134
l	ENSMUSG00000071252	2210408I21Rik	465.732	7.52667	543.56	19.6488	458.882	19.4667	442.963	30.7718	411.634	18.5856
l	ENSMUSG00000024542	Cep192	400.231	12.8501	488.454	17.7814	416.325	19.2759	403.864	25.0151	395.262	24.8853
l	ENSMUSG00000001739	Cldn15	0.803741	0.492096	5.4431	1.62266	1.60718	0.752974	1.2147	0.811459	1.41537	0.753668
l	ENSMUSG00000087704	Gm14978	0.399849	0.39948	7.85463	1.72016	0.801516	0.490328	1.81505	0.802677	0.995948	0.765603
l	ENSMUSG00000098428	Gm2260	43.0371	7.60887	82.4071	33.1494	41.0513	8.67896	45.3882	3.51514	46.4092	4.49103
l	ENSMUSG00000087721	Gm26280	6.40846	1.46694	14.6267	3.96396	4.01148	1.41412	6.45688	1.18163	3.63993	1.35265
l	ENSMUSG00000068606	Gm4841	1.00294	0.775574	5.65316	1.77883	1.60543	0.749068	0.803474	0.801693	1.20339	0.794184
l	ENSMUSG00000022849	Hspbap1	244.848	8.1292	294.417	16.7774	247.811	5.44367	245.927	10.3566	246.367	17.2417
l	ENSMUSG00000009828	Ick	984.24	43.4563	1112.4	32.4128	983.013	29.989	998.003	29.7985	970.958	42.2761
l	ENSMUSG00000031644	Nek1	1635.16	33.1995	1811.31	49.1372	1619.95	22.6823	1631.83	33.4431	1559.66	19.4751
l	ENSMUSG00000040423	Rc3h1	1533.01	18.8862	1730.8	29.1823	1546.51	48.6473	1517.42	32.8449	1468.46	46.0813
l	ENSMUSG00000033964	Zbtb41	1350.96	29.7279	1559.41	25.6708	1415	48.6768	1399.03	44.12	1284.25	42.9582
l	ENSMUSG00000020420	Zfp607a	38.6582	3.48396	59.4429	3.4353	28.6727	4.24032	37.5173	5.94343	34.4982	4.02666
m	ENSMUSG00000000056	Narf	2780.52	61.6364	3456.28	87.3999	3393.7	57.2439	3034.66	150.892	3058.42	73.689
m	ENSMUSG00000000489	Pdgfb	979.53	9.9648	1115.84	39.326	1004.41	25.1914	969.868	44.1387	971.019	29.9414
m	ENSMUSG00000001053	N4bp3	609.08	17.413	766.54	30.0947	684.8	31.5687	612.934	24.2602	659.521	31.6295
m	ENSMUSG00000001156	Mxd1	1038.22	29.2089	1216.04	55.3088	1154.55	38.7817	1042.88	32.2844	1012.05	40.058
m	ENSMUSG00000002733	Plekha3	1959.35	22.1348	2196.97	42.2999	2142.22	20.7093	2002.09	56.3658	2007.88	31.8255
m	ENSMUSG00000003382	Etv3	1427.98	51.2978	1606.34	31.3861	1528.34	31.6486	1452.77	36.5658	1352.38	46.6003
m	ENSMUSG00000004947	Dtx2	334.726	23.3733	399.362	18.7802	369.906	13.6046	313.555	17.6237	328.65	10.3213
m	ENSMUSG00000005225	Plekha8	693.16	11.9223	804.196	8.10502	777.912	26.217	723.405	43.6548	687.704	27.7609
m	ENSMUSG00000006362	Cbfa2t3	1363.73	53.5287	2045.45	113.172	1995.51	41.1235	1655.33	130.471	1625.95	125.821
m	ENSMUSG00000007908	Hmgcll1	600.575	27.4752	713.517	38.3436	689.774	22.7577	625.463	21.7551	627.343	22.0595
m	ENSMUSG00000009905	Kdsr	1430.38	20.7392	1600.47	5.26844	1635.75	35.9155	1478.65	38.4531	1463.72	12.9249
m	ENSMUSG00000011427	Zfp790	722.302	25.7239	870.576	41.3775	828.864	30.4829	761.489	41.6077	681.18	15.169
m	ENSMUSG00000015312	Gadd45b	459.737	13.1616	579.74	17.6661	593.736	20.3864	492.942	29.1755	481.332	16.3306
m	ENSMUSG00000015605	Srf	3080.67	79.5986	3758.05	79.557	3703.82	102.598	3382.06	148.299	3410.98	94.1203
m	ENSMUSG00000018334	Ksr1	4701.95	162.563	6080.18	537.356	5725.87	216.24	5240.29	207.081	5110.81	354.212
m	ENSMUSG00000018378	Cuedc1	1553.43	43.997	1755.3	39.4357	1632.86	42.5036	1455.79	67.2555	1467.85	49.774
m	ENSMUSG00000018476	Kdm6b	1359.11	55.4043	1637.65	78.2676	1638.65	68.5584	1354.21	74.1044	1282.24	95.703
m	ENSMUSG00000020184	Mdm2	1888.46	41.5281	2161.88	46.6766	2149	30.3219	1896.07	67.8766	1891.71	79.7366
m	ENSMUSG00000020190	Mknk2	1888.36	40.6301	2308.26	89.5058	2396.48	21.14	2104.03	72.3382	2061.51	35.2614
m	ENSMUSG00000020387	Jade2	3374.74	115.913	3948.42	120.988	3904.83	61.0191	3513.86	124.201	3536.83	184.219
m	ENSMUSG00000020482	Ccdc117	935.086	32.5571	1365.23	81.6039	1331.62	16.4719	1033.55	94.195	910.258	45.8586
m	ENSMUSG00000021260	Hhipl1	184.888	7.7947	258.953	12.462	223.52	11.2109	210.668	5.38694	206.101	13.0113
m	ENSMUSG00000021532	Fastkd3	398.209	8.67599	479.332	18.389	467.758	17.6165	425.373	11.3165	411.713	23.3597
m	ENSMUSG00000021890	Eaf1	1032.69	32.8322	1175.63	16.6424	1137.91	37.7574	1070.09	21.2163	993.69	28.7432
m	ENSMUSG00000022601	Zbtb11	2128.76	45.8039	2661.76	68.0512	2645.38	18.6946	2423.03	114.106	2352.88	62.7289
m	ENSMUSG00000022602	Arc	4323.06	622.675	9009.56	1217.2	8525.59	430.321	6003.22	1152.85	4356.69	1164.14
m	ENSMUSG00000022802	Lmln	825.141	14.2586	1018.71	8.96756	958.761	43.0861	880.685	66.1695	800.394	36.4951
m	ENSMUSG00000022858	Tra2b	2628.94	43.2948	3057.15	43.1149	3019.19	41.8903	2753.7	85.0541	2734.93	20.4521
m	ENSMUSG00000023025	Larp4	1982.74	40.2196	2250.57	65.368	2121.6	52.1231	2034.68	55.6333	1929.09	57.6906
m	ENSMUSG00000024136	Dnase1l2	82.1736	8.14914	140.935	9.82428	158.386	9.49233	99.3227	11.2336	95.1133	3.35366
m	ENSMUSG00000024776	Stambpl1	808.186	10.7022	941.572	10.8141	901.777	26.4829	842.883	12.4599	828.577	25.894
m	ENSMUSG00000024793	Tnfrsf25	261.164	23.9074	602.042	100.838	621.936	44.3006	389.382	66.8597	323.654	49.9172
m	ENSMUSG00000024912	Fosl1	246.23	12.0908	308.293	12.9308	315.32	16.0555	253.865	11.1899	253.135	19.9653
m	ENSMUSG00000025316	Banp	1244.05	87.5653	1876.98	99.9127	2018.43	35.193	1552.2	203.641	1480.55	132.803
m	ENSMUSG00000025402	Nab2	1135.34	18.2967	1308.82	73.9662	1231.51	32.3257	1055.17	60.2378	1124.84	72.7544
m	ENSMUSG00000025880	Smad7	1079.97	66.613	1254.08	63.3353	1138.71	45.4567	1096.42	57.5983	1074.16	52.2793
m	ENSMUSG00000026034	Clk1	6208.41	162.165	7179.69	346.273	7117.57	191.509	5829.47	392.206	5291	161.554
m	ENSMUSG00000027540	Ptpn1	2391.07	39.8565	2750.86	138.321	2729.2	47.5588	2411.18	86.0015	2410.83	96.8081
m	ENSMUSG00000027806	Tsc22d2	2092.3	47.5515	2337.93	72.9987	2317.55	73.6776	2107.31	74.3133	2050	70.2976
m	ENSMUSG00000028967	Errfi1	1795.12	27.1631	2073.04	110.984	2012.13	41.182	1849.93	84.8931	1769.27	45.853
m	ENSMUSG00000029050	Ski	8088.74	109.821	8770.88	406.11	8340.79	86.0591	8072.54	127.358	7906.49	391.79
m	ENSMUSG00000029290	Zfp326	1111.32	40.2754	1245.68	14.0203	1205.01	43.1115	1129.15	27.9051	1115.67	39.9187
m	ENSMUSG00000029416	Slc15a4	765.58	33.9155	939.45	55.3036	918.493	22.2789	831.098	27.8003	817.283	31.5489
m	ENSMUSG00000029720	Gm20605	11.4207	2.20896	23.5374	2.21154	17.0547	4.26827	13.2911	3.077	10.1057	1.84771
m	ENSMUSG00000031508	Ankrd10	1468.49	52.8573	1653.56	40.0128	1634.16	33.0066	1466.78	75.1598	1432.92	45.2315
m	ENSMUSG00000031609	Sap30	292.145	24.1592	355.292	16.6278	337.044	12.6974	273.448	18.1537	275.82	23.5392
m	ENSMUSG00000031684	Slc10a7	233.226	8.232	298.313	8.37702	271.999	11.3116	252.853	13.1199	256.599	7.50683
m	ENSMUSG00000031822	Gse1	2350.62	129.258	2934.57	314.412	2722.99	114.537	2486.92	67.3497	2419.66	242.783
m	ENSMUSG00000032633	Flcn	2022.9	46.1468	2441.69	68.0803	2508.5	58.3694	2167.22	81.5394	2168.15	50.1449
m	ENSMUSG00000033594	Spata2l	1938.45	57.4015	2255.24	132.418	2185	46.3445	1995.9	121.316	1964.48	104.514
m	ENSMUSG00000033596	Rfwd3	1258	22.4335	1407.02	30.7585	1327.25	53.9068	1279.21	36.1371	1246.5	23.6902
m	ENSMUSG00000033697	Arhgap39	5365.78	145.464	6030.37	381.986	5648.14	179.008	5375.08	49.1144	5354.71	198.742
m	ENSMUSG00000033871	Ppargc1b	299.136	18.7031	445.689	30.1762	420.89	17.5242	352.371	10.6323	375.126	33.1782
m	ENSMUSG00000034006	Pqlc1	835.691	19.7296	1200.99	33.4986	1144.71	25.5359	1062.22	33.2782	1084.67	41.3264
m	ENSMUSG00000034165	Ccnd3	966.241	46.0258	1075.62	8.95591	1022.47	34.7266	952.695	17.866	931.856	28.2384
m	ENSMUSG00000034300	Fam53c	3264.44	31.6757	3831.53	89.4148	3789.31	47.4474	3426.92	156.443	3281.16	105.239
m	ENSMUSG00000034575	Papd7	2377.4	68.9061	2767.53	66.1539	2723.43	97.0612	2460.87	71.2865	2427.46	112.095
m	ENSMUSG00000035172	Plekhh3	771.831	35.0011	899.182	35.8557	815.654	43.8288	760.387	21.8674	784.84	10.3178
m	ENSMUSG00000035187	Nkx6-1	7.40976	1.46624	22.877	2.18584	15.6455	3.02512	7.45478	1.239	8.68903	1.5154
m	ENSMUSG00000035310	Lin54	662.731	22.8337	814.291	45.9051	793.806	24.6066	703.521	20.5437	705.164	26.9487
m	ENSMUSG00000036676	Tmtc3	551.458	33.9891	658.73	24.5505	594.788	10.9585	553.659	20.537	511.546	24.7722
m	ENSMUSG00000036959	Bcorl1	1109.71	37.3507	1316.38	48.7283	1302.49	60.577	1131.93	39.1187	1072.34	62.6835
m	ENSMUSG00000037235	Mxd4	3583.53	145.182	4086.77	77.1883	4037.25	35.3023	3666.54	160.024	3640.67	49.9997
m	ENSMUSG00000037465	Klf10	1185.86	70.0911	1407.94	125.603	1300.19	28.0457	1050.17	80.8199	1069.41	98.3413
m	ENSMUSG00000037692	Ahdc1	3530	185.944	4282.95	240.667	4229.5	157.861	3746.05	140.501	3670.61	226.011
m	ENSMUSG00000037857	Nufip2	1478.09	17.7734	1853.84	45.7772	1829.1	51.8542	1578.52	58.7762	1514.46	99.7213
m	ENSMUSG00000038080	Kdm1b	500.007	13.4843	574.159	31.5804	519.557	17.8415	492.392	16.7827	480.983	21.1167
m	ENSMUSG00000038402	Foxf2	179.1	10.8474	253.302	17.8819	232.062	14.0364	198.276	16.4209	199.217	12.3069
m	ENSMUSG00000039117	Taf4	994.04	20.6491	1160.47	53.9569	1145.03	38.1611	1019.88	49.0904	1005.36	45.6045
m	ENSMUSG00000039234	Sec24d	1190.33	21.434	1391.22	81.2752	1226.84	29.2697	1145.05	99.4503	1111.48	51.0795
m	ENSMUSG00000039242	B3galnt2	598.501	19.1028	695.934	44.5058	647.291	29.7346	576.53	29.7082	550.692	21.9402
m	ENSMUSG00000040007	Bahd1	2610.96	74.8687	2964.66	125.679	2928.68	58.3043	2666.67	62.6411	2566.7	122.464
m	ENSMUSG00000040028	Elavl1	2595.73	69.3503	2836.38	72.1595	2687.72	75.2236	2548.48	46.5001	2588.15	89.7261
m	ENSMUSG00000040102	Klhl42	1464.2	25.4896	1686.11	34.8838	1606.23	33.4558	1549.58	50.3338	1527.62	51.9384
m	ENSMUSG00000040734	Ppp1r13l	177.644	13.5162	243.94	15.1022	223.112	6.05999	190.161	12.6489	180.84	7.85032
m	ENSMUSG00000040761	Spen	3362.02	121.744	4371.01	200.934	4080.03	214.417	3739.81	164.58	3493.4	309.373
m	ENSMUSG00000040918	Slc19a2	786.233	27.7847	1037.43	19.1971	1004.95	33.7465	855.613	29.219	870.775	27.5866
m	ENSMUSG00000041734	Kirrel	337.393	22.112	422.485	17.2582	402.112	34.6519	354.305	22.1418	323.24	7.84104
m	ENSMUSG00000042608	Stk40	1370.12	37.4961	1772.91	40.7553	1780.36	36.3385	1577.84	76.2954	1544.37	93.7032
m	ENSMUSG00000042659	Arrdc4	452.269	7.1994	551.693	25.4187	487.714	23.0762	472.202	9.70916	459.084	23.5533
m	ENSMUSG00000042978	Sbk1	3404.18	104.186	4729.92	165.874	4783.98	64.0923	4108.73	259.2	4195	228.694
m	ENSMUSG00000044707	Ccnjl	227.135	5.61887	265.255	10.6471	267.423	6.07082	218.627	14.5961	219.875	12.8839
m	ENSMUSG00000045598	Zfp553	1178.35	48.6787	1295.13	40.1745	1313.96	19.0257	1183.24	24.3297	1166.88	18.0115
m	ENSMUSG00000046062	Ppp1r15b	2231.96	30.7886	2678.22	38.9187	2597.47	54.1577	2400.3	81.955	2297.49	44.2587
m	ENSMUSG00000046562	Unc119b	1513.86	25.6969	1763.04	46.803	1766.55	21.4437	1597.2	54.1597	1514.9	14.4108
m	ENSMUSG00000048118	Arid4a	2280.17	44.8283	2742.88	59.3848	2531.54	47.427	2383.94	57.5722	2281.66	57.4588
m	ENSMUSG00000048701	Ccdc6	2857.19	108.277	3557.61	105.748	3496.95	78.7904	3187.05	124.602	3125.49	118.997
m	ENSMUSG00000048787	Dcun1d3	758.813	10.8097	910.444	12.5755	970.83	18.3845	815.91	41.7621	805.161	31.0056
m	ENSMUSG00000049999	Ppp1r3d	242.705	18.5733	431.005	11.3676	420.357	7.91796	371.575	16.3604	378.335	12.7508
m	ENSMUSG00000050621	Rps27rt	256.046	24.408	582.085	136.141	408.704	39.3159	323.132	72.4034	281.842	63.4711
m	ENSMUSG00000052135	Foxo6	1143.83	50.2217	1891.36	74.0091	1839.55	116.061	1431.43	153.718	1353.1	107.572
m	ENSMUSG00000052144	Ppp4r2	1863.67	18.4831	2045.13	51.3282	2012.79	64.5725	1867.74	67.9207	1754.83	58.2248
m	ENSMUSG00000052557	Gan	1214.68	57.9102	1427.78	54.5818	1329.81	62.8351	1240.59	24.72	1138.3	57.8508
m	ENSMUSG00000053684	BC048403	558.357	29.7239	646.483	27.2917	613.422	19.5023	563.33	18.2693	575.567	26.151
m	ENSMUSG00000054499	Dedd2	722.439	27.7084	927.291	56.9765	921.117	12.9377	756.318	37.5524	747.604	21.8907
m	ENSMUSG00000054611	Kdm2a	4327.37	59.0412	5171.5	143.71	4999.7	83.4778	4669.18	133.257	4399.67	193.593
m	ENSMUSG00000054893	Zfp667	698.854	23.2065	1021.33	47.0672	998.557	26.2682	840.54	57.4863	820.627	29.4935
m	ENSMUSG00000055980	Irs1	672.926	9.56705	794.861	15.7783	739.703	36.3402	681.98	34.592	641.88	55.1324
m	ENSMUSG00000056962	Jmjd6	1096.04	41.8432	1355.28	54.8612	1452.57	38.4299	1176.47	68.6266	1096.18	23.2195
m	ENSMUSG00000057469	E2f6	1204.65	23.0014	1632.54	66.5023	1609.38	51.8341	1481.46	58.7637	1411.88	30.7169
m	ENSMUSG00000058402	Zfp420	538.383	17.6369	667.678	28.5153	651.537	20.0023	582.302	25.5181	538.62	24.478
m	ENSMUSG00000060429	Sntb1	158.827	13.0833	205.563	5.31928	180.082	7.31089	164.833	9.42241	150.08	14.7652
m	ENSMUSG00000061410	Zcchc14	4860.94	146.649	5442.89	261.329	5128.6	120.106	4826.54	105.818	4700.9	243.269
m	ENSMUSG00000061411	Nol4l	2518.61	45.0243	2907.63	89.4095	2754.95	77.7237	2510.57	76.1849	2304.47	128.905
m	ENSMUSG00000061517	Sox21	602.933	19.7056	865.216	50.9298	846.504	33.6518	699.759	68.7078	668.054	15.782
m	ENSMUSG00000062075	Lmnb2	1174.19	26.9082	1330.24	59.4037	1307.42	20.599	1167.76	31.3416	1189.22	46.2923
m	ENSMUSG00000063382	Bcl9l	1971.96	37.9774	2438.31	99.2115	2270.48	50.6619	2073.82	54.1868	2049.72	91.0947
m	ENSMUSG00000066152	Slc31a2	336.913	6.32922	385.673	10.385	383.867	13.9862	341.609	15.1493	317.727	16.0499
m	ENSMUSG00000070056	Mfhas1	1997.5	39.0465	2626.63	84.4982	2661.3	52.9464	2365.77	95.1647	2246.66	59.817
m	ENSMUSG00000073542	Cep76	347.397	12.2144	471.853	23.0077	417.39	13.12	401.388	35.8935	386.862	21.8145
m	ENSMUSG00000073700	Klhl21	1028.47	37.0049	1330.23	39.1314	1215.72	34.9123	1124.25	48.9331	1029.09	19.3799
m	ENSMUSG00000074102	Rbm15b	2909.86	47.0455	3501.24	324.824	3199.67	45.4696	2932.09	57.8326	3064.42	62.72
m	ENSMUSG00000074918	Inafm2	2361.44	53.4934	2691.13	57.5958	2580.73	49.8789	2420.91	87.4356	2446.54	38.7479
m	ENSMUSG00000075028	Prdm11	1077.63	38.2584	1249.9	47.051	1216.41	67.0422	1111.01	55.3142	1103.76	36.8389
m	ENSMUSG00000075217	4833423E24Rik	36.2471	4.40921	65.7738	10.331	57.9442	2.10643	42.701	3.63872	34.2215	5.16408
m	ENSMUSG00000083579	Gm15538	4.60367	0.864684	11.2633	2.88565	8.22161	2.40029	3.63425	0.993722	3.44072	1.79783
m	ENSMUSG00000085941	Gm11201	11.8228	1.1324	22.5611	3.1532	14.6391	2.57833	12.4958	2.53693	7.07493	1.52349
m	ENSMUSG00000090207	4930524O07Rik	11.4144	1.39173	32.2243	4.32755	30.0813	2.56303	18.3372	4.15649	11.9225	2.01608
m	ENSMUSG00000091405	Hist2h4	50.652	8.17281	86.9381	8.2492	66.3376	8.29648	60.3121	4.5649	56.1638	3.56046
m	ENSMUSG00000091971	Hspa1a	252.611	6.98337	561.309	41.0586	543.896	23.424	436.958	46.1272	370.05	24.9854
m	ENSMUSG00000098475	Mir6982	7.41705	1.3	16.7605	5.57478	8.41911	1.77747	6.05946	1.40979	3.64423	1.31126
m	ENSMUSG00000101660	Gm18666	20.6354	3.35428	38.4411	6.89991	26.4561	3.91759	20.9433	4.51054	21.4251	2.1089
m	ENSMUSG00000102523	Gm37783	5.55e-17	0	3.63176	1.18565	0.400385	0.399998	5.55e-17	0	5.55e-17	0
m	ENSMUSG00000105848	Gm42683	1.59992	0.74612	7.06067	2.40639	3.21173	1.07745	1.20621	0.802221	1.80978	0.654122
n	ENSMUSG00000039372	43163	1145.04	60.0328	1329.35	47.9135	1234.64	45.7836	1238.95	65.5852	1166.67	78.4235
n	ENSMUSG00000025702	43167	2841.76	137.325	3221.02	85.9592	3279.75	89.9831	3287.96	57.0309	2920.47	52.6004
n	ENSMUSG00000086330	1700007J10Rik	22.0265	3.71751	37.6082	2.40183	31.308	5.69723	33.7146	3.96966	24.2648	2.78608
n	ENSMUSG00000031847	1700030J22Rik	313.519	4.98766	398.145	11.6171	380.279	18.6881	363.077	11.3327	347.536	20.7271
n	ENSMUSG00000022507	1810013L24Rik	2104.94	43.0333	2509.08	61.1796	2529.15	62.1411	2352.46	57.0752	2192.48	32.375
n	ENSMUSG00000062760	1810041L15Rik	3771.62	171.38	4437.78	208.558	4214.48	102.974	4613.02	286.767	3541.43	335.463
n	ENSMUSG00000032840	2410131K14Rik	1477.97	32.7482	1921.63	27.6591	1922.53	33.6443	1746.75	85.9431	1482.3	80.7636
n	ENSMUSG00000053080	2700081O15Rik	3260.58	93.2827	3644.94	136.834	3566.36	98.2584	3394.52	60.4359	3231.85	132.947
n	ENSMUSG00000048106	4632415L05Rik	1121.92	9.98428	1284.3	27.7166	1208.52	10.6988	1216.63	26.3942	1148.01	21.5217
n	ENSMUSG00000047466	8030462N17Rik	1107.96	31.9531	1316.77	34.2521	1375.62	24.5071	1210.93	61.3378	1125.33	53.1502
n	ENSMUSG00000086359	9630013K17Rik	9.01791	1.6842	20.2512	4.66776	20.2488	3.50118	13.7166	3.84863	8.48239	2.65245
n	ENSMUSG00000006403	Adamts4	1248.19	128.504	1502.76	78.9765	1382.61	126.335	1426.97	50.6731	1194.85	41.2881
n	ENSMUSG00000025236	Adpgk	591.036	27.3393	691.388	32.7894	655.706	32.672	674.764	38.8595	598.126	19.4979
n	ENSMUSG00000030609	Aen	851.536	13.8414	966.777	33.2239	982.175	13.3954	892.833	27.492	831.526	27.3325
n	ENSMUSG00000042650	Alkbh5	3425.08	62.4685	4155	101.44	4153.16	81.9218	3922.58	171.35	3598.66	64.0498
n	ENSMUSG00000028028	Alpk1	147.449	11.0484	194.153	9.58204	175.466	10.8253	187.106	15.0001	137.984	7.99554
n	ENSMUSG00000021986	Amer2	1522.89	52.391	1778.98	50.956	1747.99	40.2377	1639.44	95.7047	1532.49	88.8414
n	ENSMUSG00000034867	Ankrd27	1650.4	53.7276	1868.54	60.7106	1734.91	35.5786	1704.07	42.2249	1634.09	28.7843
n	ENSMUSG00000014498	Ankrd52	3348.05	100.47	3885.82	142.339	3758.51	171.519	3736.43	127.28	3402.28	261.463
n	ENSMUSG00000039219	Arid4b	2822.45	32.0231	3154.85	92.3605	2955.1	57.3889	2959.42	40.3695	2831.45	57.9565
n	ENSMUSG00000025870	Arl10	776.547	56.2088	1026.96	37.2664	1041.63	8.81137	959.972	63.2406	899.35	26.1217
n	ENSMUSG00000026311	Asb1	2138.32	38.5498	2344.64	53.7103	2361.65	45.856	2358.66	28.4532	2087.68	17.8272
n	ENSMUSG00000021738	Atxn7	1268.82	37.077	1507.69	61.0236	1423.66	54.1703	1408.32	36.329	1324.78	56.9762
n	ENSMUSG00000030847	Bag3	534.321	28.0143	658.911	45.5963	622.456	10.9438	625.957	22.8368	560.182	25.0444
n	ENSMUSG00000040054	Baz2a	3232.24	78.9711	3622.93	158.909	3507.28	120.621	3425.54	75.9443	3192.16	132.925
n	ENSMUSG00000022641	Bbx	1465.5	17.2627	1871.81	26.6245	1798.6	56.4547	1898.42	57.0167	1669.91	114.115
n	ENSMUSG00000041702	Btbd7	585.951	42.7996	704.412	14.2338	664.111	22.1573	638	18.38	566.583	47.2434
n	ENSMUSG00000071317	Bves	88.7141	6.46079	142.711	12.8884	128.412	14.4481	110.472	11.2783	94.7104	10.2026
n	ENSMUSG00000019732	Calr3	63.2638	9.51624	85.5713	11.5399	87.4268	6.83212	74.5615	4.60426	62.7731	9.06765
n	ENSMUSG00000044433	Camsap3	1092.4	30.188	1268.55	31.6869	1212.68	14.2051	1173.21	50.7142	1130.42	46.1633
n	ENSMUSG00000000184	Ccnd2	3351.29	85.5069	4355.04	223.194	4428.69	174.285	3766.39	259.937	3405.58	188.371
n	ENSMUSG00000021258	Ccnk	1012.79	24.674	1151.47	33.1172	1102.69	41.5199	1063.03	39.4429	998.817	18.6508
n	ENSMUSG00000046722	Cdc42se1	2804.52	51.9102	3082.02	77.5274	3037.95	50.8444	2968.63	81.4234	2810.68	106.054
n	ENSMUSG00000050910	Cdr2l	1452.76	59.9353	1636.81	91.6223	1645.85	67.6872	1549.08	66.4177	1443.31	30.9275
n	ENSMUSG00000039523	Cep104	2154.94	26.0149	2363.39	37.3912	2357.55	67.7638	2266.04	59.1506	2103.48	83.2857
n	ENSMUSG00000057335	Cep170	3889.19	108.307	4334.71	54.3541	4140.68	94.3773	4165.59	99.4861	3945.62	222.444
n	ENSMUSG00000033671	Cep350	2419.4	79.219	2927.6	83.7829	2964.95	161.173	2772.7	98.0251	2584.58	169.839
n	ENSMUSG00000037443	Cep85	654.354	19.4741	739.103	39.1392	729.666	17.5514	677.445	19.7344	619.998	29.6027
n	ENSMUSG00000022604	Cep97	853.08	38.9844	1066.35	31.5097	1066.32	43.2936	995.066	36.1589	946.297	51.9656
n	ENSMUSG00000087408	Cers1	1726.64	25.5945	1947.72	45.907	1915.46	24.0542	1793.36	62.2285	1732.1	78.9598
n	ENSMUSG00000054604	Cggbp1	3054.08	73.4927	3465.25	66.3439	3360.79	40.1335	3286.9	114.613	3146.67	67.2554
n	ENSMUSG00000034157	Cipc	4055.82	75.9874	4400.01	82.7572	4270.82	43.2716	4168.57	99.2613	4035.58	58.2267
n	ENSMUSG00000062169	Cnih4	1302.45	13.0772	1531.45	25.532	1498.5	40.3067	1448.17	49.9145	1352.09	27.6179
n	ENSMUSG00000037408	Cnnm4	737.085	36.9258	845.324	57.7104	825.567	15.8881	756.494	36.4879	724.429	20.0754
n	ENSMUSG00000038784	Cnot4	1513.76	22.4215	1812.97	41.4906	1847.3	26.6047	1750.97	58.8336	1672.38	31.7433
n	ENSMUSG00000026174	Cnot9	1161.91	24.1408	1332.36	35.1186	1305.6	21.8849	1278.24	49.002	1223.39	43.5515
n	ENSMUSG00000067028	Cntnap5b	497.7	20.4021	613.003	23.3847	580.474	27.314	575.934	29.234	508.349	31.8163
n	ENSMUSG00000038002	Cramp1l	1471.21	39.6717	1622.68	44.2074	1626.23	66.863	1523.16	38.3966	1442.02	72.343
n	ENSMUSG00000024074	Crim1	5721.82	182.864	7118.56	175.269	6734.91	189.048	6721.84	108.266	6306.48	284.923
n	ENSMUSG00000006134	Crkl	2030.99	60.1515	2434.21	43.898	2485.34	51.8942	2274.21	131.031	2078.98	53.748
n	ENSMUSG00000032384	Csnk1g1	1665.09	58.9811	1847.36	21.6896	1812.56	58.0768	1763.52	47.1639	1619.47	65.2573
n	ENSMUSG00000001467	Cyp51	2088.11	83.7828	2392.34	57.4161	2414.86	42.788	2265.58	70.523	2129.75	55.7211
n	ENSMUSG00000033470	Cysltr2	6.20497	1.34733	12.2326	2.23996	9.22463	1.36571	6.65249	1.72161	5.65243	1.37775
n	ENSMUSG00000018001	Cyth3	2002.96	41.2935	2189.96	51.1862	2109.04	17.526	2044.06	43.307	2025.17	41.7646
n	ENSMUSG00000040325	Dcaf1	1461.64	14.5445	1676.16	61.7937	1660.67	50.2368	1584.4	42.8288	1535.49	46.2727
n	ENSMUSG00000078515	Ddi2	2773.04	47.3508	3319.68	93.4869	3159.97	63.131	3028.16	106.906	2834.7	172.389
n	ENSMUSG00000063428	Ddo	222.243	29.4351	307.58	3.78428	270.473	7.1063	265.499	17.8602	231.874	16.0935
n	ENSMUSG00000033658	Ddx19b	1491	41.6441	1668.18	13.2316	1570.12	28.2643	1565.76	36.1381	1517.58	76.5694
n	ENSMUSG00000026502	Desi2	1099.52	14.1939	1309.28	45.2262	1256.07	33.5741	1209.26	50.1602	1104.22	33.5279
n	ENSMUSG00000005483	Dnajb1	2282.55	119.924	3517.78	154.064	3788.61	135.491	3176.8	238.161	3016.54	85.6818
n	ENSMUSG00000039763	Dnajc28	672.011	26.8419	813.129	26.0553	840.355	26.8613	787.198	38.1972	705.468	33.2486
n	ENSMUSG00000022639	Dubr	373.618	18.2036	522.335	22.9347	474.509	28.8913	481.135	22.4004	439.729	24.6483
n	ENSMUSG00000028630	Dyrk2	851.932	30.7009	1076.72	21.502	1011.03	38.0279	1012.57	40.1827	905.202	71.0396
n	ENSMUSG00000043019	Edem3	2882.71	90.3439	3307.72	63.1432	3176.04	61.6248	3267.44	74.8454	2963.1	134.616
n	ENSMUSG00000039990	Edrf1	1158.28	26.757	1489.96	26.2165	1497.09	43.0673	1391.94	67.1131	1277.02	19.5814
n	ENSMUSG00000031217	Efnb1	589.788	29.5253	718.631	49.6291	697.477	33.2174	626.128	34.0593	601.085	34.3608
n	ENSMUSG00000020091	Eif4ebp2	892.852	20.776	1088.99	22.2137	1068.31	30.6699	1030.99	51.4337	960.496	73.7737
n	ENSMUSG00000043460	Elfn2	5659.69	136.932	7034.39	176.758	6924.54	99.4261	6352.16	266.009	6307.63	422.964
n	ENSMUSG00000050604	ENSMUSG00000050604	12.2207	3.2119	25.5634	4.07211	16.8414	2.42114	17.741	2.31074	15.5409	1.95244
n	ENSMUSG00000035020	Epgn	5.55e-17	0	1.61339	0.751919	1.40597	0.874652	0.401364	0.400415	5.55e-17	0
n	ENSMUSG00000025198	Erlin1	991.734	60.5841	1205.31	55.4327	1219.67	36.0106	1110.93	51.5386	1072.36	30.6388
n	ENSMUSG00000028995	Fam126a	1146.72	33.344	1353.69	36.7372	1370.9	77.1673	1228.25	103.19	1161.74	42.7776
n	ENSMUSG00000036501	Fam13b	2429.25	64.255	2733.89	84.4065	2705.63	36.0739	2647.43	59.0796	2416.68	127.75
n	ENSMUSG00000073805	Fam196a	405.499	24.9674	504.044	22.1215	505.792	14.1244	473.604	26.0733	427.114	23.0562
n	ENSMUSG00000027495	Fam210b	1271.06	61.9739	1623.22	51.6375	1580.84	30.7191	1600.54	44.8455	1447.97	30.2605
n	ENSMUSG00000030019	Fbxl14	1416.19	31.7579	1673.01	19.8342	1662.29	14.5879	1579.16	35.3053	1467.86	40.9626
n	ENSMUSG00000047539	Fbxo28	2836.29	79.9287	3225.58	82.1508	3109.84	23.2734	3111.14	91.1268	2919	74.056
n	ENSMUSG00000018844	Fndc8	71.0792	8.04966	112.335	13.7415	111.271	3.91452	90.0248	10.2785	67.338	6.64757
n	ENSMUSG00000033713	Foxn3	591.86	39.6109	688.111	10.3973	667.781	33.9259	644.987	27.8208	578.428	41.6097
n	ENSMUSG00000020520	Galnt10	580.707	29.4204	663.139	31.6875	650.95	20.6908	630.444	30.483	569.161	25.1133
n	ENSMUSG00000036180	Gatad2a	1562.28	52.9552	1799.44	45.9759	1745.12	74.0093	1664.99	57.4816	1595.86	62.7816
n	ENSMUSG00000021302	Ggps1	1064.28	20.0067	1349	41.9921	1289.73	19.8365	1300.67	14.6018	1228.78	40.4016
n	ENSMUSG00000067736	Gm10222	5.55e-17	0	0.808219	0.381663	0.200198	0.200004	0.602065	0.400261	5.55e-17	0
n	ENSMUSG00000072589	Gm10371	5.55e-17	0	1.5973	1.16137	0.200434	0.200263	1.4138	0.604124	5.55e-17	0
n	ENSMUSG00000087357	Gm12498	5.55e-17	0	1.61306	0.751877	0.803269	0.491687	0.606476	0.402414	5.55e-17	0
n	ENSMUSG00000078889	Gm14288	47.6489	7.98703	208.04	24.9532	224.159	12.0331	208.884	17.4547	164.305	8.55372
n	ENSMUSG00000074417	Gm14548	5.55e-17	0	1.60492	1.36674	0.399403	0.399008	0.401822	0.400926	5.55e-17	0
n	ENSMUSG00000086441	Gm15046	40.8607	4.13805	61.0331	7.76048	48.3247	4.79804	51.9882	5.04335	39.257	6.24636
n	ENSMUSG00000091881	Gm17146	2.40219	0.977863	10.654	1.08206	5.01264	1.34579	5.048	1.02487	4.24755	1.51605
n	ENSMUSG00000087750	Gm23468	2.00224	0.54856	6.23479	2.45766	4.21513	1.5	4.43872	1.17507	2.00496	0.94783
n	ENSMUSG00000087819	Gm25117	12.2255	2.43499	22.4804	4.01768	18.8515	2.77035	22.1948	4.94909	12.1289	4.74951
n	ENSMUSG00000098061	Gm26945	59.3346	8.94176	121.069	11.8536	125.514	21.6234	90.3957	16.2798	61.1076	7.33349
n	ENSMUSG00000090872	Gm3239	1.80043	0.966582	8.84601	2.9054	6.61668	1.03361	5.03988	1.58336	3.83621	0.865742
n	ENSMUSG00000090673	Gm340	100.779	5.15233	136.47	10.1248	146.217	17.3706	108.266	12.7632	101.933	11.2252
n	ENSMUSG00000090643	Gm3453	5.55e-17	0	4.6274	1.80153	5.01073	1.3029	4.02908	1.37899	1.00926	0.453171
n	ENSMUSG00000102302	Gm38190	91.386	8.44543	131.106	14.0172	106.669	6.27843	100.437	9.19039	86.7352	12.017
n	ENSMUSG00000102599	Gm38386	0.401438	0.401199	3.41607	1.77506	2.8081	0.494117	2.00902	0.895035	5.55e-17	0
n	ENSMUSG00000106990	Gm42547	261.304	23.6704	351.833	17.9779	373.661	22.593	305.106	31.8967	281.594	15.373
n	ENSMUSG00000050936	Gm42743	45.6889	3.62117	80.1679	9.63008	81.0106	4.03249	68.6782	10.6086	54.6324	7.24422
n	ENSMUSG00000105746	Gm43595	5.55e-17	0	2.40278	1.16603	0.400385	0.399998	2.00921	0.895387	5.55e-17	0
n	ENSMUSG00000086909	Gm4926	12.4171	1.92987	24.5648	3.5749	21.6572	4.08334	22.582	2.64432	12.8779	3.94743
n	ENSMUSG00000100153	Gm5601	372.964	46.0191	559.106	87.1596	415.534	36.7345	507.329	80.8191	382.293	44.1739
n	ENSMUSG00000078192	Gm7290	0.400318	0.24489	2.4135	0.405228	3.20305	1.85673	3.22277	1.15571	0.40717	0.248914
n	ENSMUSG00000053925	Gm9929	19.0356	2.37117	43.6546	5.64605	42.7181	4.38854	42.5303	6.93251	30.467	3.1639
n	ENSMUSG00000039210	Gpatch2	1020.95	35.5727	1198.54	14.0989	1165.67	36.1559	1129.79	29.0305	1043.33	47.159
n	ENSMUSG00000066197	Gpr139	25.4059	7.14505	43.3714	5.695	40.4886	1.868	33.6494	4.50107	26.0073	4.14776
n	ENSMUSG00000052229	Gpr17	1676.14	113.702	2613.32	75.7364	2569.73	78.1046	2462.19	128.605	2143.37	154.677
n	ENSMUSG00000035666	Gtf3c4	2280.1	55.5509	2629.35	56.3294	2503.26	42.7043	2548.68	105.054	2386.44	81.3498
n	ENSMUSG00000032360	Hcrtr2	122.031	5.43764	188.078	14.067	177.313	13.7985	157.102	12.1491	151.289	7.14775
n	ENSMUSG00000048878	Hexim1	3431.89	53.1093	4070.08	111.227	4155.02	123.413	3783.76	151.08	3724.92	100.295
n	ENSMUSG00000019789	Hey2	162.447	8.0795	202.285	19.194	235.885	10.4853	201.76	21.3262	157.753	7.289
n	ENSMUSG00000032119	Hinfp	426.697	14.9173	508.249	20.3791	456.027	26.8708	461.432	25.0602	423	20.2474
n	ENSMUSG00000039377	Hlx	24.2409	4.98102	41.1386	6.71165	37.8801	5.70539	32.8755	4.06159	24.1456	4.8787
n	ENSMUSG00000045216	Hs6st1	2146.19	24.2462	2561.33	60.0233	2456.71	116.784	2521.96	96.0291	2337.91	75.5024
n	ENSMUSG00000037851	Iars	2601.53	62.7393	2992.29	73.039	2955.31	111.197	2920.99	53.811	2708.86	105.601
n	ENSMUSG00000039662	Icmt	3890.39	44.8816	4303.46	32.2931	4265.3	19.9075	4221.64	107.045	4027.66	104.989
n	ENSMUSG00000021756	Il6st	5202.19	221.291	5625.73	103.116	5586.58	99.6749	5506.6	168.648	5191.19	112.554
n	ENSMUSG00000037035	Inhbb	461.625	14.3176	594.144	26.7113	611.887	31.5651	550.458	25.6686	498.071	32.5592
n	ENSMUSG00000040738	Ints8	1042.88	32.6279	1433.24	55.9297	1476.1	6.22842	1366.68	90.7418	1270.81	41.013
n	ENSMUSG00000060733	Ipmk	1983.33	46.149	2264.15	57.1278	2291.55	55.2812	2082.83	127.493	1955.62	51.9205
n	ENSMUSG00000060969	Irx1	65.4392	11.2864	119.769	11.8631	140.211	30.8906	121.821	16.9475	72.2268	5.39298
n	ENSMUSG00000027276	Jag1	414.936	19.7128	532.645	27.8451	531.846	29.8644	485.499	43.1534	452.209	36.8532
n	ENSMUSG00000021690	Jmy	3041.46	51.9651	3461.74	48.6779	3298.85	81.7851	3320.07	122.83	3131.04	129.093
n	ENSMUSG00000052684	Jun	4288.14	160.099	5506.54	319.792	5732.57	255.501	4961.59	191.638	4798.41	215.794
n	ENSMUSG00000034110	Kctd7	689.672	22.0489	850.247	30.3708	850.624	26.5488	798.361	40.2203	703.106	22.7589
n	ENSMUSG00000042599	Kdm7a	2632.79	50.4404	3199.75	199.458	3250.11	101.659	3065.76	119.069	2824.67	210.149
n	ENSMUSG00000048732	Klhl11	1721.77	56.7741	2013.59	69.3528	2035.84	59.8998	1973.91	62.8626	1788.3	83.4041
n	ENSMUSG00000049327	Kmt5a	1998.18	26.8318	2306.77	108.218	2306.57	27.3901	2099.72	94.9342	1894.91	53.8887
n	ENSMUSG00000021959	Lats2	2304.28	128.642	2624.98	74.0492	2476.35	103.952	2497.89	45.1946	2302.14	90.9325
n	ENSMUSG00000020593	Lpin1	1237.4	60.8056	1561.54	48.978	1516.31	92.859	1422.68	38.6176	1344.37	60.0029
n	ENSMUSG00000054720	Lrrc8c	1149.35	13.0941	1377.41	61.2217	1402.26	48.8474	1280.47	38.1907	1228.26	64.6838
n	ENSMUSG00000024188	Luc7l	4941.74	48.8712	5654.71	47.9064	5608.25	89.9171	5320.75	140.248	5246.99	32.5611
n	ENSMUSG00000004085	Map3k20	424.32	19.8112	498.438	20.1812	458.915	20.539	453.189	18.6254	420.73	12.2949
n	ENSMUSG00000037253	Mex3c	2003.69	22.3141	2354.76	56.827	2368.53	57.1311	2237.48	63.6849	2025.2	54.34
n	ENSMUSG00000020522	Mfap3	1318.94	9.45751	1569.08	55.9723	1657.77	44.6872	1432.88	68.0274	1368.36	45.6281
n	ENSMUSG00000041945	Mfsd9	94.4814	10.9771	120.602	1.2222	104.814	6.05044	107.879	11.7372	90.8365	4.8591
n	ENSMUSG00000027612	Mmp24	2386.13	42.7175	2790.43	104.184	2719.35	24.0285	2575.08	116.262	2522.46	78.2366
n	ENSMUSG00000042138	Msantd2	459.406	12.1732	553.017	24.0543	542.194	14.9853	500.354	13.5743	452.879	15.8325
n	ENSMUSG00000028890	Mtf1	1599.03	40.189	1768.43	95.4346	1731.48	48.8004	1657.82	61.8509	1555.23	56.8055
n	ENSMUSG00000018401	Mtmr4	4285.19	145.522	6004.59	136.952	6080.37	179.413	5756.31	337.056	5253.21	238.072
n	ENSMUSG00000020067	Mypn	90.8184	11.9507	117.509	11.6688	93.0125	3.4271	103.526	8.29134	84.8094	7.7361
n	ENSMUSG00000031652	N4bp1	2693.62	52.8807	3227.64	75.4824	3235.59	92.4512	3052.69	151.011	2848.95	124.926
n	ENSMUSG00000037795	N4bp2	412.574	20.3598	519.861	13.266	551.738	42.9381	494.346	47.4651	428.033	24.8341
n	ENSMUSG00000039164	Naif1	227.826	13.5268	301.34	20.9022	263.932	17.4333	271.443	4.77092	249.802	10.3218
n	ENSMUSG00000020783	Ncbp3	1165.99	38.4989	1310.67	30.9188	1266.98	22.174	1232.66	49.8236	1146.92	24.6802
n	ENSMUSG00000027678	Ncoa3	1880.81	44.9977	2204.8	111.927	2089.21	107.82	2019.11	47.8831	1940.8	109.532
n	ENSMUSG00000054008	Ndst1	4908.1	73.9143	5691.65	102.674	5383.13	129.889	5547.31	36.9996	5265.35	234.802
n	ENSMUSG00000034413	Neurl1b	2559.04	155.814	3105.89	72.9608	3124.35	120.903	2781.89	182.003	2646.75	91.252
n	ENSMUSG00000072919	Noxred1	30.276	8.20873	56.9616	5.4842	57.7155	6.07094	40.3146	3.16953	36.6025	4.05901
n	ENSMUSG00000021374	Nup153	2332.77	64.642	2574.94	90.728	2505.41	59.9789	2401.05	87.4602	2267.73	106.826
n	ENSMUSG00000016619	Nup50	1937.86	49.0336	2210.91	67.7828	2227.27	53.9367	2169.42	69.4398	2007.92	21.8904
n	ENSMUSG00000031072	Oraov1	787.438	32.6291	906.33	34.6549	859.922	17.2461	808.343	43.272	769.603	35.0785
n	ENSMUSG00000022807	Osbpl11	1189.97	27.2449	1343.25	30.2659	1334.65	45.2867	1227.45	50.6317	1182.16	46.4159
n	ENSMUSG00000022330	Osr2	5.55e-17	0	1.59946	0.396658	0.400385	0.399998	1.61763	0.760032	5.55e-17	0
n	ENSMUSG00000019916	P4ha1	2028.04	63.9505	3236.43	193.264	3389.03	64.0917	2983.24	290.653	2747.25	220.886
n	ENSMUSG00000027508	Pag1	1406.94	44.1988	1612.2	44.5112	1543.42	26.1152	1554.09	24.7871	1420.95	48.0548
n	ENSMUSG00000036779	Papd5	2287.25	46.0017	2612.96	52.7317	2537.84	21.1182	2480.67	82.6154	2305.21	81.6199
n	ENSMUSG00000033623	Pcgf3	2280.14	21.1429	2689.64	16.8066	2718	54.201	2573.63	107.434	2492.13	89.7061
n	ENSMUSG00000005615	Pcyt1a	1944.97	40.6923	2111.35	44.342	2053.2	23.6458	2037.38	49.8472	1947.89	27.6154
n	ENSMUSG00000041229	Phf8	1274.05	32.3805	1554.26	47.3889	1556.59	67.3742	1524.68	63.8006	1346.5	62.5804
n	ENSMUSG00000039987	Phtf2	733.353	27.0023	839.786	29.0484	805.01	26.9792	816.503	27.905	740.414	18.4183
n	ENSMUSG00000029263	Pigg	821.481	5.79979	1045.73	48.5999	985.89	16.6244	972.027	19.3307	939.407	23.1784
n	ENSMUSG00000026447	Pik3c2b	719.649	47.4987	842.307	26.3273	812.301	58.851	743.824	39.0608	704	26.0409
n	ENSMUSG00000028698	Pik3r3	2733.44	67.5254	3291.68	83.0187	3299.41	77.2141	3181.16	55.1432	2994.63	124.967
n	ENSMUSG00000031538	Plat	1512.78	40.6416	1847.39	51.8804	1834.82	67.8747	1702.69	91.3348	1524.1	59.3623
n	ENSMUSG00000040128	Pnrc1	1967.25	49.6871	2241.45	45.1976	2167.84	20.8332	2081.04	82.5708	1976.62	44.8563
n	ENSMUSG00000049553	Polr1a	1169.86	46.3821	1789.17	77.6638	1726.84	84.1918	1735.28	37.6431	1600.49	97.1947
n	ENSMUSG00000026181	Ppm1f	3760.18	86.4336	4481.03	91.727	4587.36	81.2343	4279.3	188.134	4098.72	100.532
n	ENSMUSG00000055491	Pprc1	1059.86	47.2787	1317.62	52.8116	1284.79	71.5662	1170.66	88.0152	1069.6	55.3956
n	ENSMUSG00000057637	Prdm2	3169.52	64.9949	4175.47	161.644	4035.71	89.1835	3823.17	145.952	3738.1	222.421
n	ENSMUSG00000026586	Prrx1	305.912	14.7668	368.597	15.4139	370.856	12.1102	325.557	18.6339	293.422	12.3532
n	ENSMUSG00000029624	Ptcd1	906.91	34.534	1131.45	65.345	1082.2	32.7115	1013.73	38.9049	946.566	36.6608
n	ENSMUSG00000021466	Ptch1	2962.27	100.739	3388.69	115.572	3629.19	204.918	3406.35	160.217	3037.34	115.702
n	ENSMUSG00000049184	Purg	690.079	28.5356	815.509	50.3374	811.745	14.5397	744.054	34.0336	711.955	30.6278
n	ENSMUSG00000047824	Pygo2	2218.39	66.6228	2634.86	52.87	2654.94	48.5425	2493.76	100.058	2425.9	36.3334
n	ENSMUSG00000004768	Rab23	1366.09	30.8262	1515.97	45.799	1520.53	34.6264	1408.51	39.6736	1300.97	50.3228
n	ENSMUSG00000055069	Rab39	64.2874	5.03916	113.429	10.3093	109.84	7.50503	91.5362	6.34238	80.9546	9.70724
n	ENSMUSG00000026594	Ralgps2	2747.28	39.7578	3301.81	99.6572	3261.58	111.857	3084.29	144.446	2785	135.999
n	ENSMUSG00000037415	Ranbp10	1690.38	42.8539	1879.21	65.0239	1860.54	68.0798	1733.58	40.4296	1676.56	57.9735
n	ENSMUSG00000079575	Rbpj-ps3	249.776	10.2702	300.987	16.8416	296.474	15.2855	287.325	9.96245	254.556	20.3716
n	ENSMUSG00000017692	Rhbdl3	950.986	76.8274	1430.09	54.8654	1407.15	35.6528	1252.18	79.6685	1196.71	39.6203
n	ENSMUSG00000025427	Rnf165	3469.14	56.9844	4043.68	131.17	3948.92	43.4698	3692.11	146.567	3633.09	215.471
n	ENSMUSG00000022120	Rnf219	621.292	12.9915	705.47	13.7744	680.64	15.0033	640.528	30.5824	632.84	20.876
n	ENSMUSG00000032044	Rpusd4	230.268	13.9172	465.116	8.68929	446.62	13.5863	418.249	23.2563	404.664	15.6427
n	ENSMUSG00000058392	Rrp1b	493.562	40.1847	578.412	14.0501	589.861	27.7609	505.55	31.4211	496.64	19.0419
n	ENSMUSG00000050079	Rspry1	1262.17	38.0681	1430.44	36.7626	1327.9	35.4968	1344.35	41.7197	1306.61	24.9238
n	ENSMUSG00000024565	Sall3	233.964	12.9176	303.81	15.6479	288.634	13.0715	267.878	10.7553	259.975	15.9513
n	ENSMUSG00000032018	Sc5d	1312.22	20.0412	1481.47	23.814	1447.09	17.3165	1524.1	57.1994	1337.95	42.4626
n	ENSMUSG00000021451	Sema4d	2010.85	108.591	2268.65	65.1555	2193.7	79.4468	2156.41	53.2994	2034.16	96.7033
n	ENSMUSG00000071177	Serpina1d	5.55e-17	0	1.00258	0.632911	0.200198	0.200004	2.22307	0.74609	5.55e-17	0
n	ENSMUSG00000028893	Sesn2	810.039	22.7715	934.31	42.5094	918.802	27.2627	876.341	33.7937	789.946	16.2873
n	ENSMUSG00000038384	Setd1b	2091.06	100.595	2575.45	119.19	2520.27	100.973	2314.35	115.58	2207.28	178.828
n	ENSMUSG00000053617	Sh3pxd2a	2515.48	35.894	2965.95	53.1819	2805.01	68.765	2695.31	108.221	2448.9	141.663
n	ENSMUSG00000021448	Shc3	946.612	45.8219	1206.77	44.4973	1097.56	18.1083	1152.19	42.2406	1032.06	80.6393
n	ENSMUSG00000090112	Shprh	2378.91	49.2966	2636.46	76.1067	2477.18	64.7708	2583.01	81.1698	2366.71	91.7176
n	ENSMUSG00000036432	Siah2	713.681	31.5263	848.872	59.6061	833.392	30.9593	765.001	31.9779	732.909	23.2314
n	ENSMUSG00000024042	Sik1	422.887	35.3385	662.411	31.9913	670.141	40.3873	594.979	58.9376	477.568	76.1019
n	ENSMUSG00000027854	Sike1	1881.51	39.8987	2111.71	34.9677	2061.41	49.0216	2054.04	63.8377	1907.92	72.2461
n	ENSMUSG00000034460	Six4	60.1063	7.11938	115.87	11.6428	99.839	4.68789	95.2278	7.50019	83.6247	5.76026
n	ENSMUSG00000047789	Slc38a9	842.932	25.2406	1049.01	17.1976	1041.12	42.3298	985.282	44.533	919.012	32.8079
n	ENSMUSG00000013275	Slc41a1	3448.04	32.1131	3828.6	91.9048	3868.07	98.6084	3745.58	135.482	3492.53	159.979
n	ENSMUSG00000089774	Slc5a3	1539.22	123.182	2363.62	186.197	2497.07	80.1284	2081.77	174.146	1976.5	122.513
n	ENSMUSG00000041313	Slc7a1	2444.21	47.6065	2952.46	51.8255	2900.21	45.3047	2801.89	65.7555	2636.71	130.736
n	ENSMUSG00000031904	Slc7a6	897.656	22.9679	987.158	19.4562	987.018	24.5925	907.895	19.032	885.427	39.2676
n	ENSMUSG00000036097	Slf2	2278.38	74.8383	2563.61	51.7135	2514.94	74.6844	2402.06	95.1655	2198.61	92.9469
n	ENSMUSG00000031681	Smad1	872.074	26.5781	1008.11	37.1504	1049.31	28.7979	920.54	25.3596	909.902	20.5324
n	ENSMUSG00000038290	Smg6	2301.09	54.5389	2503.62	47.6657	2583.65	24.7353	2435.78	83.5849	2252.19	85.6836
n	ENSMUSG00000038780	Smurf1	2361.45	36.426	2671.1	93.7731	2514.34	65.8845	2457.22	37.542	2303.72	62.1883
n	ENSMUSG00000022765	Snap29	1202.52	15.4407	1432.13	39.1854	1411.9	40.2286	1441.07	69.2813	1309.15	40.6831
n	ENSMUSG00000027488	Snta1	1623.82	16.8114	1778.66	38.8223	1836.83	26.6602	1647.57	68.8852	1619.11	49.524
n	ENSMUSG00000020876	Snx11	1194.67	35.0799	1326.72	37.9391	1246.79	19.5982	1214.85	39.2404	1204.78	31.7143
n	ENSMUSG00000034801	Sos2	1916.79	60.9306	2169.61	49.3353	2212.21	45.0304	2148.19	93.9623	1947.09	77.2433
n	ENSMUSG00000021036	Sptlc2	1452.32	37.4364	1955.51	34.7844	1859.91	39.703	1921.26	90.2926	1755.45	18.9938
n	ENSMUSG00000032621	Srek1	2177.41	56.5228	2422.14	94.0306	2494.41	63.6403	2251.4	40.898	2160.01	90.5611
n	ENSMUSG00000042121	Ssh1	1283.87	47.1687	1466.53	29.8989	1490.75	42.687	1378.58	35.7766	1295.77	55.0174
n	ENSMUSG00000052748	Swt1	398.424	11.044	711.866	34.8097	691.322	22.2877	647.891	41.8739	592.32	14.2104
n	ENSMUSG00000005374	Tbl2	1469.89	23.8011	1665.71	17.0372	1664.44	33.3709	1617.64	62.9996	1525.12	79.3629
n	ENSMUSG00000030699	Tbx6	23.8448	1.59894	39.054	4.60827	39.7129	4.01059	30.2522	2.2609	20.1798	1.6346
n	ENSMUSG00000028619	Tceanc2	617.883	17.0798	769.203	31.5247	713.294	23.4436	705.687	28.4007	653.128	8.13795
n	ENSMUSG00000032228	Tcf12	2418.32	52.6415	2664.08	37.4465	2621.32	90.3504	2548.64	82.0957	2427	34.2633
n	ENSMUSG00000050052	Tdrp	799.043	18.2529	907.048	58.1317	912.344	20.4879	870.597	29.8451	777.609	30.8407
n	ENSMUSG00000020137	Thap2	571.752	22.5602	691.282	38.2883	677.11	16.5102	643.292	20.9583	600.334	40.9115
n	ENSMUSG00000036151	Tm6sf2	61.8463	8.84831	106.276	16.0184	99.1247	15.6928	75.9764	3.61917	62.668	7.77586
n	ENSMUSG00000030126	Tmcc1	4234.37	72.8179	5253.57	87.8347	5229.89	107.686	4945.54	127.127	4800.81	57.9531
n	ENSMUSG00000033767	Tmem131l	897.065	60.934	1042.5	85.9548	999.036	27.6626	920.854	40.7697	875.008	45.6128
n	ENSMUSG00000043664	Tmem221	3.60373	0.744108	10.448	2.47248	6.40914	1.58795	7.85694	2.19948	4.01877	1.64925
n	ENSMUSG00000071719	Tmem28	1517.24	38.6186	1998.38	53.879	2071.92	23.4516	1804.47	111.175	1704.81	74.7613
n	ENSMUSG00000019850	Tnfaip3	331.97	26.4817	457.561	36.6762	427.38	12.818	381.254	42.729	352.898	29.7943
n	ENSMUSG00000027692	Tnik	7599.95	248.446	8621.62	204.085	8206.62	341.816	8060.42	277.674	7691.46	408.074
n	ENSMUSG00000031529	Tnks	3324.2	169.954	3752.66	71.792	3581.34	119.642	3860.49	93.7464	3372.35	250.799
n	ENSMUSG00000020422	Tns3	3545.59	150.1	3936.8	68.7434	3860.99	68.3975	3704.86	75.7108	3476.97	74.3351
n	ENSMUSG00000034292	Traf3ip1	780.953	26.0045	874.291	21.4376	900.713	24.6171	849.8	39.2072	783.812	34.1385
n	ENSMUSG00000033949	Trim36	368.177	32.2181	439.898	34.2142	388.848	25.1834	403.832	17.1681	356.435	23.6202
n	ENSMUSG00000039725	Trp53rka	650.551	33.1477	773.068	13.1497	733.094	14.0302	723.379	23.6065	684.006	14.0447
n	ENSMUSG00000026812	Tsc1	3511.58	75.2494	4131.08	42.0756	3917.21	129.106	3808.96	101.025	3603.5	182.388
n	ENSMUSG00000020781	Tsen54	349.782	7.71555	399.238	20.1654	370.914	9.99731	402.658	11.3336	332.715	13.5072
n	ENSMUSG00000034848	Ttc21b	686.069	31.1509	800.55	27.3518	759.623	25.1218	717.319	44.9114	646.75	14.6343
n	ENSMUSG00000056832	Ttc26	482.804	5.47542	561.568	23.9882	540.357	20.0157	512.486	41.425	483.76	17.235
n	ENSMUSG00000025209	Twnk	684.084	12.6881	818.966	28.8878	812.9	35.5751	752.581	32.1873	708.683	12.6792
n	ENSMUSG00000030870	Ubfd1	2520.51	68.1261	3250.33	39.4787	3287.17	75.3115	3017.09	144.54	2854.47	67.9571
n	ENSMUSG00000053774	Ubxn7	2235.89	44.966	2451.69	61.7773	2387.24	75.6745	2281.02	56.4362	2182.85	58.2233
n	ENSMUSG00000079685	Ulbp1	1.60237	0.400389	8.27253	3.43887	3.6039	1.32799	7.44253	3.0293	1.81366	0.670671
n	ENSMUSG00000031976	Urb2	674.499	33.8164	855.651	36.6374	850.38	35.154	761.846	43.7662	696.664	30.6093
n	ENSMUSG00000033364	Usp37	1152.32	38.6675	1388.45	29.9419	1373.32	32.3976	1262.88	45.5049	1223.36	32.6886
n	ENSMUSG00000041264	Uspl1	1692.94	50.27	1902.16	44.2755	1950.95	34.7803	1789.17	39.2178	1699.19	13.6426
n	ENSMUSG00000021256	Vash1	1168.49	17.0742	1362.34	54.3658	1294.92	57.4494	1215.14	45.6968	1133	72.0325
n	ENSMUSG00000023951	Vegfa	2395.11	80.1134	3039.87	177.09	3260.96	47.9905	2850.1	106.343	2666.52	88.6643
n	ENSMUSG00000078970	Wdr92	419.127	19.2978	490.049	15.5753	489.9	16.0268	459.744	24.4382	397.325	11.2226
n	ENSMUSG00000041058	Wwp1	2212.69	54.1736	2415.38	26.0408	2293.68	51.2261	2504.78	54.9402	2210.86	54.382
n	ENSMUSG00000018427	Ypel2	1853.27	96.3712	2268.31	112.047	2257.36	26.9735	2039.83	102.872	1879.08	70.7235
n	ENSMUSG00000038866	Zcchc2	1249.48	33.3697	1522.59	64.87	1556.19	75.0957	1451.18	80.6118	1308.41	70.254
n	ENSMUSG00000006463	Zdhhc24	936.124	14.1932	1063.75	19.9144	1056.18	33.264	990.041	17.1493	973.119	38.387
n	ENSMUSG00000053581	Zfand2a	2588.12	73.6496	2800.43	32.2818	2806.7	71.5289	2721.29	63.1736	2576.01	61.4838
n	ENSMUSG00000017667	Zfp334	1215.22	34.6059	1389.8	25.4249	1314.51	8.68461	1291.68	48.0803	1249.83	30.5249
n	ENSMUSG00000044807	Zfp354c	2548.8	38.1381	2793.38	38.144	2624.21	41.9351	2669.1	47.2007	2511	85.0485
n	ENSMUSG00000050919	Zfp366	106.774	3.73199	150.377	21.3661	155.413	18.4095	118.755	12.9865	106.055	6.85749
n	ENSMUSG00000024276	Zfp397	1689.13	37.4888	1904.73	35.8376	1862.93	46.687	1815.51	56.3878	1678.03	56.091
n	ENSMUSG00000060206	Zfp462	2152.02	76.3657	2887.49	121.865	2819.57	53.8307	2563.18	80.586	2375.66	188.212
n	ENSMUSG00000039789	Zfp597	596.98	8.21782	689.626	27.6848	669.892	13.2701	687.269	36.9848	609.163	26.6522
n	ENSMUSG00000057093	Zfp607b	415.11	11.0848	483.091	12.2818	478.531	9.04841	443.508	29.206	410.491	29.6103
n	ENSMUSG00000074519	Zfp971	62.0857	6.75335	419.642	9.03827	426.402	9.70207	391.985	12.1352	347.993	17.5798
n	ENSMUSG00000035877	Zhx3	3375.89	67.9883	3829.15	156.951	3782.72	105.042	3570.34	116.865	3457.93	121.261
n	ENSMUSG00000021327	Zkscan3	1569.45	17.8142	1737.36	56.8813	1743.94	53.3681	1634.67	65.3062	1569.01	47.7393
n	ENSMUSG00000043207	Zmpste24	1489.6	29.3803	1715.22	34.4482	1673.74	57.2123	1707.03	27.5994	1566.94	13.0242
n	ENSMUSG00000043872	Zmym1	356.894	17.1328	501.39	11.9061	512.929	18.083	451.676	47.7077	423.584	16.8412
n	ENSMUSG00000061894	Zscan20	258.177	10.4986	309.857	19.7687	322.408	20.2777	283.833	24.6546	245.421	9.50996
n	ENSMUSG00000050619	Zscan29	373.295	21.1421	448.625	14.2079	450.101	3.95155	400.163	16.9051	356.516	18.3416
n	ENSMUSG00000045822	Zswim3	378.824	10.6592	463.801	24.113	458.514	6.59986	457.779	29.4423	387.751	14.8467
n	ENSMUSG00000032846	Zswim6	1466.93	29.7627	1668.45	70.5708	1576.28	53.3054	1589.61	32.0797	1507.19	65.0199

## Sheet: Recov_V_LPS
			SAMR1/water/LPS		SAMP8/water/LPS		SAMP8/KS/LPS		SAMP8/NKS/LPS		SAMP8/HJG/LPS
Category	Gene_ID	Gene_name	AVG	SEM	AVG	SEM	AVG	SEM	AVG	SEM	AVG	SEM
a'	ENSMUSG00000030059	Tmf1	2295.99	71.6344	1847.18	23.5391	2035.45	95.3763	1884.18	40.2473	2000.81	73.6918
a'	ENSMUSG00000103928	Gm37893	80.9864	9.03175	34.426	3.65177	51.0506	8.0132	37.6959	2.89904	46.1934	5.74174
a'	ENSMUSG00000035051	Dhx57	2147.77	61.4095	1777.25	30.5868	1953.77	108.848	1855.46	32.1459	1863.09	29.5702
a'	ENSMUSG00000026837	Col5a1	1390.64	77.9949	845.009	137.205	1076.54	128.903	984.578	45.4065	1050.89	119.701
a'	ENSMUSG00000021223	Papln	122.026	28.2507	62.0696	5.02282	87.4492	7.44827	72.805	6.93173	70.3024	9.01798
a'	ENSMUSG00000104212	Gm37986	16.3204	2.46253	2.37284	1.15834	7.98579	1.96876	5.19259	1.99937	3.98026	3.02695
a'	ENSMUSG00000030769	Slc5a11	91.4339	5.41408	46.6595	1.8962	71.2793	6.02855	50.5012	10.829	62.3133	6.19702
a'	ENSMUSG00000017868	Sgk2	70.2134	11.153	31.6102	4.04014	50.2675	4.44133	35.3124	3.33489	40.3925	8.44966
a'	ENSMUSG00000059864	Olfr1393	12.8557	10.8984	5.55e-17	0	2.19906	1.2	0.801659	0.490916	0.799593	0.489651
a'	ENSMUSG00000020115	Tbk1	2421.36	58.5127	2133.31	23.0898	2314.45	81.0795	2160.99	24.3537	2205.04	37.7522
a'	ENSMUSG00000097156	Gm3764	2576.12	113.714	2126.53	56.9693	2368.88	151.827	2059.04	69.7387	2183.01	66.4519
a'	ENSMUSG00000105659	4930509H03Rik	3.17892	2.69965	5.55e-17	0	3.78743	0.788959	1.196	0.487908	2.38684	0.504512
a'	ENSMUSG00000025480	Syce1	11.9418	3.91895	2.18687	1.5	11.5858	2.79211	5.19295	1.49275	4.98209	1.79877
a'	ENSMUSG00000043807	Ly6g5b	7.5806	2.4854	1.19686	0.799798	4.77453	1.60881	2.39293	0.748392	1.19867	0.800609
a'	ENSMUSG00000049971	Glt1d1	914.056	51.1915	775.494	16.0806	859.235	35.7558	853.133	31.9519	815.501	24.6193
a'	ENSMUSG00000024045	Akap8	3133.16	41.2192	2683.45	100.741	3070.9	183.825	2775.7	125.763	2812.7	97.6496
a'	ENSMUSG00000034653	Ythdc2	1671.21	25.2352	1437.62	53.8327	1605.71	57.4447	1549.02	55.2902	1565.58	33.9183
a'	ENSMUSG00000106383	E330034L11Rik	226.674	21.8893	164.821	13.5161	202.325	22.3495	169.046	9.64838	186.67	6.17238
a'	ENSMUSG00000033039	Micall1	1491.63	62.0482	1222.51	27.7548	1400.58	41.8385	1264.37	61.811	1273.65	58.6205
a'	ENSMUSG00000028126	Pip5k1a	3264.89	52.9545	2902.91	44.3354	3178.58	27.8326	3060.46	91.4401	2999.93	49.029
a'	ENSMUSG00000097383	1500026H17Rik	98.2636	5.2122	71.7966	4.28182	93.0156	7.11188	82.3302	5.78794	79.0067	4.78893
a'	ENSMUSG00000097631	ENSMUSG00000097631	2.38551	0.389214	5.55e-17	0	1.00489	0.778171	0.398167	0.398016	0.595932	0.396823
a'	ENSMUSG00000064147	Rab44	6.75428	1.11956	1.98213	0.623578	4.78614	1.00931	3.79641	1.02083	1.99351	1.09756
a'	ENSMUSG00000097134	1110002J07Rik	28.8654	3.00947	15.4341	3.17766	26.1161	4.20889	17.9433	1.50338	15.7235	1.36584
a'	ENSMUSG00000033053	1700028P14Rik	42.1936	9.84568	19.7462	3.56369	37.0719	7.11134	27.9319	4.87556	28.0564	6.222
a'	ENSMUSG00000105337	1700094M23Rik	2.78631	1.84122	5.55e-17	0	2.39556	1.16827	2.39735	0.678029	2.38408	1.1579
a'	ENSMUSG00000021870	Slmap	6060.29	348.717	5407.39	28.509	5870.2	195.724	5775.77	60.5041	5772.18	149.682
a'	ENSMUSG00000031668	Eif2ak3	1298.12	39.3461	1156.78	29.6317	1317.86	34.559	1189.16	37.6253	1200.98	17.8537
a'	ENSMUSG00000038335	Tsr1	1706.69	50.6447	1530.1	21.862	1669.81	50.7057	1545.94	33.91	1553.43	29.0426
a'	ENSMUSG00000032593	Amigo3	139.789	7.11673	100.968	11.5139	138.394	8.70984	115.641	5.81474	111.496	9.75531
a'	ENSMUSG00000004341	Gpx6	8.3157	3.2668	0.400432	0.400432	5.19607	2.49925	0.796617	0.796318	2.38333	1.15612
a'	ENSMUSG00000105469	A930036I15Rik	19.6883	2.07452	7.32753	2.40237	15.9725	2.56004	17.3468	3.0923	15.5238	1.60079
a'	ENSMUSG00000020692	Nle1	479.646	22.3843	400.169	14.519	462.276	24.3853	437.693	19.4589	404.965	8.29598
a'	ENSMUSG00000079061	Gm11042	2.38225	1.45232	5.55e-17	0	1.40111	0.750888	0.601138	0.401297	0.396715	0.242878
a'	ENSMUSG00000032212	Sltm	3698.26	107.778	3239.32	136.84	3623.4	181.669	3235.12	84.9544	3524.38	74.0598
a'	ENSMUSG00000029120	Ppp2r2c	27920.2	369.982	25572.9	747.073	27373	796.529	26405.7	360.168	25821.6	248.728
a'	ENSMUSG00000059772	Slx1b	517.476	16.0557	434.046	3.07571	498.744	37.7798	473.607	12.1471	466.194	26.6471
a'	ENSMUSG00000087331	1810021B22Rik	156.053	14.1685	116.475	9.09133	150.709	7.47214	134.208	7.75189	122.813	4.96655
a'	ENSMUSG00000030270	Cpne9	1492.41	208.203	1073.76	148.356	1483.06	82.742	1260.87	107.56	1259.09	135.132
a'	ENSMUSG00000100432	Gm7539	2.79317	1.35566	5.55e-17	0	2.40508	0.981897	0.399486	0.399335	0.79515	0.486812
a'	ENSMUSG00000041358	Nutm1	11.7538	4.50193	4.75145	0.808706	10.5869	2.06598	8.17497	1.01997	6.76714	0.800661
a'	ENSMUSG00000027350	Chgb	28958.7	2318.72	24596.9	1223.08	27963	1478.47	25939	676.608	24269.8	660.658
a'	ENSMUSG00000082364	Gm11955	7.39138	2.11452	1.3849	0.861925	5.79197	1.56532	2.79629	1.02567	3.18012	0.788856
a'	ENSMUSG00000045876	Pcdhb8	193.897	16.2404	144.873	12.7746	191.327	11.8118	157.44	11.8407	108.255	3.74476
a'	ENSMUSG00000107191	Gm43579	5.5898	2.11984	0.794931	0.486723	4.19215	1.02432	1.60318	0.981746	1.58974	0.397159
a'	ENSMUSG00000050157	Gm867	41.7937	4.55262	21.3286	4.81279	38.9235	5.41054	34.4916	6.84176	33.8111	5.03306
a'	ENSMUSG00000105776	Gm43292	5.173	0.481923	1.38545	0.595229	4.79296	0.507797	6.9838	2.23681	8.15788	2.28668
a'	ENSMUSG00000076494	Trbj2-3	6.7716	1.50985	1.9745	0.53804	6.98419	1.72902	5.17953	1.22643	4.9785	1.48775
a'	ENSMUSG00000031834	Pik3r2	7945.27	230.36	7267.83	132.013	7884.2	293.65	7610.7	66.4274	7356.32	81.1093
a'	ENSMUSG00000081944	Gm12276	76.4651	3.19797	54.6077	3.34443	72.6819	8.47668	70.8564	9.59882	66.8882	3.24936
a'	ENSMUSG00000046668	Cxxc5	4236.52	116.018	3827.9	148.353	4235.14	103.376	4027.41	114.98	4026.62	97.0362
a'	ENSMUSG00000038271	Iffo1	984.833	18.1991	875.609	8.16573	1009.88	48.5402	924.881	28.7525	893.824	25.062
a'	ENSMUSG00000029640	Usp12	3781.09	124.701	3468.46	20.0237	3745.51	61.4657	3522.65	52.5326	3701.36	75.1847
a'	ENSMUSG00000074340	Ovgp1	140.99	6.39458	98.2401	19.3571	135.439	18.7867	91.9209	8.75136	121.087	14.1843
a'	ENSMUSG00000086657	Stamos	12.702	2.57178	5.73633	1.01519	11.1705	1.69718	10.7614	1.83685	9.55348	2.22159
a'	ENSMUSG00000020429	Igfbp1	1.98308	0.881659	5.55e-17	0	1.19907	0.801229	0.400028	0.399878	0.797174	0.488181
a'	ENSMUSG00000030231	Plekha5	2270.04	60.7214	2006.35	88.0019	2232.68	145.182	2134.21	58.8762	2008.33	94.2574
a'	ENSMUSG00000038550	Ciart	530.696	22.1727	420.62	34.3098	524.426	34.2289	504.825	38.2703	460.967	43.9605
a'	ENSMUSG00000082189	Gm4784	4.17857	1.10712	0.791892	0.791803	5.18571	0.790475	1.99274	1.25858	2.99444	1.09793
a'	ENSMUSG00000106073	Gm42892	6.41186	3.58533	1.57866	1.15299	7.17604	1.84084	2.79698	1.02231	5.17275	2.14094
a'	ENSMUSG00000083811	Gm13071	13.3742	3.00975	6.13028	1.34403	15.1511	2.98166	8.77543	0.506948	7.98028	2.67183
a'	ENSMUSG00000050967	Creg2	7241.22	427.428	6484.36	155.756	7165.52	273.968	6905.64	125.545	6901.62	228.394
a'	ENSMUSG00000106244	Gm43046	1.40019	0.754985	5.55e-17	0	1.60392	0.75092	0.797736	0.48827	1.19987	0.799264
a'	ENSMUSG00000026202	Tuba4a	17025.6	395.522	15366	801.684	16797.2	746.107	16664.8	454.714	16260.1	733.213
a'	ENSMUSG00000065475	Mir27b	22.7306	4.32235	12.0929	4.19939	21.3806	4.72421	19.538	2.78237	15.336	3.52709
a'	ENSMUSG00000101406	Gm29200	1.20883	0.804497	5.55e-17	0	1.201	0.801701	0.598475	0.397989	0.397041	0.396967
a'	ENSMUSG00000083642	Gm13148	1.58627	0.395176	5.55e-17	0	1.99196	1.08653	0.200826	0.200826	1.00004	0.632121
a'	ENSMUSG00000065765	Gm23851	5.98028	1.71276	1.58417	0.744045	6.1824	1.54549	2.59333	1.46077	2.98903	1.09339
a'	ENSMUSG00000106188	Gm9710	1.59557	0.975927	5.55e-17	0	1.98776	1.2553	3.99454	1.44907	0.998923	0.998741
a'	ENSMUSG00000040187	Arntl2	275.006	10.3726	221.688	15.0965	275.52	38.1086	231.302	17.7038	240.532	17.5079
a'	ENSMUSG00000005107	Slc2a9	103.096	15.8529	73.9205	10.2556	99.6012	5.3279	89.953	4.30298	79.7922	6.39772
a'	ENSMUSG00000103115	Gm37584	32.7914	4.88056	19.9478	3.33907	31.4991	5.45779	26.9345	3.09905	23.6969	2.69997
a'	ENSMUSG00000072258	Taf1a	481.924	15.1753	422.867	16.6418	481.557	30.807	413.377	6.15514	429.104	10.2878
a'	ENSMUSG00000104610	Gm567	1.39383	0.395395	5.55e-17	0	1.19964	0.797646	5.55e-17	0	5.55e-17	0
a'	ENSMUSG00000070732	Rbm44	1.60473	0.754748	5.55e-17	0	2.8088	1.50496	5.55e-17	0	5.55e-17	0
a'	ENSMUSG00000102344	9430053O09Rik	81.5982	3.7279	60.1318	5.83889	80.9769	8.72877	69.9639	6.23875	65.0389	6.2197
a'	ENSMUSG00000084310	Gm11950	1.80937	1.57604	5.55e-17	0	1.60044	0.400147	5.55e-17	0	0.794522	0.794375
a'	ENSMUSG00000086184	Gm12764	8.72986	3.38849	2.77775	1.01836	8.37797	1.46269	2.78405	1.48762	2.38354	0.741088
a'	ENSMUSG00000105076	A930003O13Rik	35.3664	6.01287	21.7376	2.31272	38.1359	4.11883	29.7025	4.42965	30.0509	3.09759
a'	ENSMUSG00000037159	Wee2	6.56789	1.71614	1.97474	0.621997	7.17716	1.47684	4.38738	0.74972	3.98135	0.634558
a'	ENSMUSG00000090004	Gm16125	3.79268	1.27238	0.395623	0.395578	3.995	1.5574	0.401449	0.401449	0.798424	0.48894
a'	ENSMUSG00000089669	Tnfsf13	23.4209	3.94918	14.6217	3.10945	22.9543	1.19122	19.9342	3.55993	17.3197	1.23973
a'	ENSMUSG00000097904	Gm26711	21.7007	2.33231	12.8536	1.09125	24.5828	5.83258	16.1525	1.84953	15.9174	2.4319
a'	ENSMUSG00000044949	Ubtd2	590.437	14.5842	525.81	5.50496	596.721	24.2338	559.856	20.4204	557.298	9.98406
a'	ENSMUSG00000087413	Gm11266	123.848	10.5455	96.769	11.6361	121.548	8.61909	112.876	4.61123	107.89	11.6472
a'	ENSMUSG00000097403	9230116N13Rik	20.6566	2.73572	11.0716	3.11663	20.1426	1.73887	13.7669	2.17679	14.9196	2.11158
a'	ENSMUSG00000097016	Gm26708	4.75378	2.24309	1.38731	1.15851	4.38748	1.70825	3.39168	0.406858	1.60127	1.16812
a'	ENSMUSG00000038518	Jarid2	1802.76	15.0759	1642.03	63.2065	1804.54	87.3762	1647.38	23.1347	1655.38	33.174
a'	ENSMUSG00000031788	Kifc3	3009.32	90.1036	2778.69	62.3396	3067.14	136.421	2845.25	38.3244	2912.97	70.6837
a'	ENSMUSG00000098129	Gm27040	20.6769	5.00384	12.249	2.23242	22.1394	2.9575	19.5458	2.88991	19.8832	4.00071
a'	ENSMUSG00000087184	Gm11650	13.5249	1.472	7.91751	1.27551	15.3493	2.12914	10.5739	3.40935	9.15869	1.75301
a'	ENSMUSG00000073073	Gm8098	73.4298	4.69437	54.9693	2.92396	79.848	5.81189	61.218	2.6407	67.6701	4.6583
a'	ENSMUSG00000040850	Psme4	2177.14	25.2827	1952.59	73.8043	2185.92	173.588	2106.28	88.6505	2125.99	73.3039
a'	ENSMUSG00000019124	Scrn1	11021.6	367.383	10352.9	217.747	11078.7	223.893	10887.2	97.1154	10889.2	177.344
a'	ENSMUSG00000040441	Slc26a10	135.236	8.32979	101.851	6.82173	144.569	12.6949	104.883	9.9173	116.002	14.8166
a'	ENSMUSG00000100590	Gm4785	1.18559	0.482668	5.55e-17	0	2.3928	0.97598	0.398167	0.398016	0.400709	0.400709
a'	ENSMUSG00000019813	Cep57l1	220.951	10.8637	184.328	4.84266	220.56	11.0854	205.111	18.3464	217.269	15.0417
a'	ENSMUSG00000044060	ENSMUSG00000044060	5611.43	338.926	4942.15	251.317	5703.7	412.024	5558.29	241.648	5287.6	159.346
a'	ENSMUSG00000082252	Gm11204	3.18987	0.813588	0.800801	0.800801	3.19258	1.14778	2.98805	1.17636	2.78657	0.490698
a'	ENSMUSG00000101639	Gm8597	7.94478	1.60138	2.78212	0.970921	8.18107	1.3867	6.78935	1.54508	6.17254	2.2373
a'	ENSMUSG00000019943	Atp2b1	41656	1784.66	37671.9	365.509	41770	2066.06	37884.4	886.425	38967.8	428.719
a'	ENSMUSG00000020536	Llgl1	2848.29	36.5793	2606.51	63.3724	2856.23	106.043	2641.49	81.292	2714.67	122.509
a'	ENSMUSG00000032915	Adgre4	7.55665	1.44354	1.39982	1.16753	9.97194	1.07255	3.79376	1.19731	6.77222	4.6923
b'	ENSMUSG00000046111	Cep295	916.121	17.0975	713.728	26.9716	848.464	64.5015	801.049	8.29753	792.442	26.9852
b'	ENSMUSG00000097800	B230344G16Rik	39.416	5.78289	14.835	3.34998	29.7638	4.36537	29.5248	3.62653	18.1094	2.23777
b'	ENSMUSG00000018796	Acsl1	2393.11	61.9612	2073.72	29.3189	2269.36	46.2714	2312.97	59.2027	2217.9	48.0736
b'	ENSMUSG00000039349	C130074G19Rik	1723.38	134.768	1095.71	231.221	1429.97	111.557	1422.49	114.277	1364.54	96.3377
b'	ENSMUSG00000073117	Gm7347	6.9543	2.57685	0.197052	0.197029	2.80298	0.974295	2.00648	2.00648	0.997588	0.772546
b'	ENSMUSG00000086472	Gm16172	28.4907	3.05396	14.2476	1.36466	27.7047	3.50382	25.1322	2.17497	15.925	1.16146
b'	ENSMUSG00000100636	Gm3551	5.55391	1.91979	0.39519	0.241968	3.60303	1.83138	4.79234	1.61925	1.99436	1.09237
b'	ENSMUSG00000082399	Gm14036	56.9398	6.84432	32.426	7.60928	50.6777	3.91181	48.4586	6.86451	46.1679	3.58951
b'	ENSMUSG00000028836	Slc30a2	153.007	7.47113	108.978	14.5143	139.264	8.71126	139.999	8.39294	103.714	5.38339
b'	ENSMUSG00000047904	Sstr2	723.084	35.8719	586.671	39.7399	776.859	41.5375	697.955	26.6267	638.272	46.5903
b'	ENSMUSG00000071633	Gm4952	7.99638	2.48212	1.58457	1.15749	8.16632	3.59209	5.57053	2.02375	3.98078	0.892027
b'	ENSMUSG00000078586	Gm11735	1.78542	0.905293	5.55e-17	0	1.39498	0.596017	1.99071	0.829592	0.597166	0.397191
b'	ENSMUSG00000093447	Gm5139	2.78455	1.48339	5.55e-17	0	1.60353	0.750869	1.20394	1.20394	0.995539	0.446275
b'	ENSMUSG00000033872	Best4-ps	2.1891	0.911165	5.55e-17	0	1.8059	0.921588	2.39492	1.16531	0.399524	0.39945
b'	ENSMUSG00000080788	Gm7841	2.38663	1.15393	5.55e-17	0	1.19657	0.488201	1.19915	0.489567	0.795769	0.487193
b'	ENSMUSG00000102193	Gm7299	5.57019	3.04425	0.397178	0.397133	3.38837	1.32175	5.79501	2.21107	2.98471	1.33418
b'	ENSMUSG00000099340	Gm29540	1.78754	1.10018	5.55e-17	0	1.98965	1.29317	1.793	0.663112	5.55e-17	0
b'	ENSMUSG00000087291	Gm11946	1.39113	0.39892	5.55e-17	0	2.39332	0.970098	1.5951	0.746375	0.796415	0.796269
b'	ENSMUSG00000086146	Gm15729	1.98788	0.890275	5.55e-17	0	1.59076	0.74434	1.99604	1.08967	0.397041	0.396967
b'	ENSMUSG00000028385	Snx30	2943.12	101.859	2667.72	45.5749	2925.74	92.2674	2909.59	42.6598	2811.84	79.4557
b'	ENSMUSG00000088545	Gm25982	3.1784	1.02118	0.395623	0.395578	2.98481	1.08659	4.18696	1.27623	1.59784	0.746415
b'	ENSMUSG00000053214	Gm9899	633.738	33.4964	520.311	52.3045	617.118	66.2079	621.802	32.2514	581.517	22.0726
b'	ENSMUSG00000005949	Ctns	632.232	15.5858	563.711	6.80016	635.248	8.7856	631.808	31.1299	620.379	8.55055
b'	ENSMUSG00000092090	Gm3294	147.216	4.38697	107.773	16.0464	147.554	8.9538	146.556	7.98258	121.336	20.1237
b'	ENSMUSG00000103583	Gm38325	1.58098	0.738156	5.55e-17	0	1.79907	1.11767	1.99285	1.54167	0.600005	0.400497
b'	ENSMUSG00000073371	Gm6594	34.7396	5.34089	21.7502	3.24092	33.506	3.68365	33.6771	6.15365	33.0242	3.03527
b'	ENSMUSG00000079065	BC005561	631.796	30.5735	538.856	22.1757	661.306	80.5192	628.595	42.4435	597.654	17.0961
b'	ENSMUSG00000022426	Josd1	3398.49	53.7698	3165.4	81.811	3405.83	35.3279	3397.97	63.9316	3331.23	47.038
b'	ENSMUSG00000021553	Slc28a3	31.0399	5.47719	17.3967	3.09461	31.702	4.02028	31.7328	6.28426	29.8286	8.81042
b'	ENSMUSG00000023999	Kif6	137.774	4.97043	105.756	7.00639	135.795	10.8312	139.695	14.5885	122.922	9.12869
b'	ENSMUSG00000097491	Gm2366	1.19762	0.795277	5.55e-17	0	1.6	0.97919	1.59865	0.750436	0.397041	0.396967
b'	ENSMUSG00000041313	Slc7a1	2571.72	112.098	2340.35	34.6322	2833.21	78.5427	2579.49	51.3805	2481.4	130.952
b'	ENSMUSG00000098056	Gm8100	7.1732	1.93972	2.95707	1.24609	10.5967	3.78325	7.37074	2.20919	4.38179	1.17006
c'	ENSMUSG00000003458	Ncstn	2159.24	10.0627	1989.69	44.0215	2035.74	46.2018	2128.14	43.0864	2094.35	60.8074
c'	ENSMUSG00000005148	Klf5	247.823	24.6442	188.998	30.3895	204.176	12.0914	243.337	28.0765	224.95	15.4217
c'	ENSMUSG00000007877	Tcap	85.0837	10.9204	57.4089	9.10965	68.4812	3.86903	84.7632	10.3831	72.4528	8.65489
c'	ENSMUSG00000019932	Kera	1.2007	0.801918	5.55e-17	0	0.398694	0.398364	1.59201	0.743893	0.797019	0.487955
c'	ENSMUSG00000020374	Rasgef1c	500.109	70.822	317.777	55.1239	355.981	29.0111	457.211	46.4222	340.808	40.4937
c'	ENSMUSG00000020660	Pomc	75.6736	5.76855	46.5069	5.69676	50.1037	6.65005	76.2454	18.338	51.3114	6.7908
c'	ENSMUSG00000020912	Krt12	120.209	13.2348	81.0162	19.0471	90.4805	10.3629	121.614	12.624	79.6221	5.37915
c'	ENSMUSG00000021573	Tppp	24333.1	953.117	22178	954.757	24190.7	1010.51	24270	665.494	22999.8	570.85
c'	ENSMUSG00000022342	Kcnv1	2853	193.974	2411.97	114.526	2604.9	130.8	2906.93	132.543	2730.55	46.921
c'	ENSMUSG00000022683	Pla2g10	2.3736	1.58076	5.55e-17	0	0.803878	0.492273	1.59476	0.976113	1.19734	1.19713
c'	ENSMUSG00000024172	St6gal2	1507.93	57.1507	1216.85	96.6256	1343.48	81.5791	1427.87	101.227	1374.24	81.6077
c'	ENSMUSG00000025551	Fgf14	1454.92	44.4541	1267.19	41.5549	1288.55	69.7983	1402.44	53.7819	1370.33	52.7017
c'	ENSMUSG00000026893	Gca	482.472	26.4177	413.418	10.9234	428.973	14.8111	468.919	14.393	454.554	23.0442
c'	ENSMUSG00000027394	Ttl	3555.84	89.2796	3127.72	164.69	3387.67	94.0159	3534.83	93.1939	3326.46	45.7719
c'	ENSMUSG00000027489	Necab3	1716.61	134.806	1349.23	134.76	1569.67	111.081	1606.31	110.724	1568.86	88.1588
c'	ENSMUSG00000028399	Ptprd	8627.18	392.255	7571.44	459.505	8161	422.22	8489.43	389.146	8443.44	370.132
c'	ENSMUSG00000028758	Kif17	780.208	37.6001	667.119	56.6387	752.511	48.5145	770.777	31.6878	662.35	33.5619
c'	ENSMUSG00000028883	Sema3a	610.584	56.8131	428.818	47.2085	415.515	35.7132	578.549	60.7838	479.591	37.872
c'	ENSMUSG00000030315	Vgll4	1430.46	49.1775	1266.71	21.6194	1296.41	29.5218	1397.02	53.5512	1220.7	18.8249
c'	ENSMUSG00000030792	Dkkl1	355.625	26.4613	235.187	66.9729	256.035	17.7119	336.605	36.236	270.754	37.5088
c'	ENSMUSG00000030898	Cckbr	1652.16	143.026	1109.51	195.976	1294.55	64.3685	1538.95	128.468	1267.78	100.136
c'	ENSMUSG00000031323	Dmrtc1a	163.394	8.13974	120.146	9.55769	131.876	5.96275	159.978	8.70125	143.042	11.1027
c'	ENSMUSG00000031519	Asb5	21.2945	3.88764	12.0717	2.55363	11.9629	1.75033	21.7467	2.65445	18.7215	7.39776
c'	ENSMUSG00000031628	Casp3	313.104	15.0668	247.174	16.3688	275.649	13.8544	287.55	13.8709	275.77	11.4538
c'	ENSMUSG00000031927	1700012B09Rik	32.1135	4.62813	13.8195	3.61	22.977	4.8925	30.5273	4.71084	21.286	5.50252
c'	ENSMUSG00000032609	Klhdc8b	1088.54	63.8749	925.062	31.2918	966.594	28.1111	1085.49	55.261	984.177	54.1059
c'	ENSMUSG00000032750	Gab3	64.0748	2.63053	46.2475	2.92762	60.3245	5.80947	62.597	2.34951	56.1664	8.46752
c'	ENSMUSG00000033731	3300002A11Rik	24.0891	4.48195	10.4847	2.63266	11.98	1.4379	21.3395	3.09307	14.5212	2.84317
c'	ENSMUSG00000033910	Gucy1a1	3782.86	574.788	2805.98	222.322	2947.75	102.702	3638.13	166.689	3141.01	154.868
c'	ENSMUSG00000035179	Ppp1r32	89.1851	11.6587	55.8987	7.07298	82.4559	15.3057	88.7354	7.33258	77.5449	9.76786
c'	ENSMUSG00000036062	Phf24	11970.1	311.139	9865.31	652.909	10655.5	341.979	11536.1	357.186	10637.2	605.75
c'	ENSMUSG00000036315	Znrd1	596.961	17.7838	529.221	12.3498	534.456	23.6845	628.162	7.38021	566.044	22.1755
c'	ENSMUSG00000036815	Dpp10	5467.08	409.86	4388.75	277.027	4608.15	173.453	5403.67	219.498	5045.53	92.5962
c'	ENSMUSG00000037148	Arhgap10	563.657	61.4685	398.76	40.7409	441.148	26.4813	522.011	24.701	436.46	30.211
c'	ENSMUSG00000038151	Prdm1	34.8199	2.3471	19.1794	2.29433	23.1593	3.33528	42.2622	2.79071	24.2888	4.03741
c'	ENSMUSG00000040170	Fmo2	81.8674	6.92668	50.2192	4.55601	62.0696	4.70257	72.1561	6.39234	58.3438	6.8999
c'	ENSMUSG00000042918	Mamstr	89.8403	7.14592	67.3927	4.57489	69.0619	5.06461	92.0953	11.0103	80.619	6.34747
c'	ENSMUSG00000044081	Zfp85os	87.8186	6.77738	48.6145	2.63071	65.4459	5.52302	71.3953	4.55069	59.1194	6.93927
c'	ENSMUSG00000045690	Wdr89	20.7203	3.29439	11.255	2.30486	14.5695	1.13472	21.1258	2.2949	13.1266	2.5463
c'	ENSMUSG00000046747	Gm9812	8.1872	3.53105	2.37738	0.739392	5.58167	1.01564	6.98701	2.78665	4.18459	2.1936
c'	ENSMUSG00000047671	Tctex1d4	42.2616	8.95002	20.346	3.14042	34.3385	5.24224	37.6903	5.71748	22.4713	5.19086
c'	ENSMUSG00000058152	Chsy3	535.365	13.2711	345.651	33.8177	338.402	23.2507	423.09	35.1042	366.167	22.24
c'	ENSMUSG00000058248	Kcnh1	3369.6	118.073	2812.66	243.774	3014.26	61.3191	3359.25	121.112	2917.47	145.037
c'	ENSMUSG00000059423	Zfp933	492.598	10.5677	397.466	5.51655	430.013	39.9192	463.856	20.2786	456.491	25.7167
c'	ENSMUSG00000065694	Gm25411	6.97229	1.51507	1.78015	0.202852	4.60518	1.8938	5.99301	1.77691	3.58278	1.28621
c'	ENSMUSG00000069011	Gm10254	117.318	19.8988	76.235	9.83866	99.0416	11.9161	132.705	21.6472	88.936	11.2937
c'	ENSMUSG00000073565	Prr16	279.663	25.2726	215.572	14.7265	217.725	16.4065	287.957	32.8568	235.93	11.7825
c'	ENSMUSG00000076498	Trbc2	332.22	22.2064	221.168	64.5243	264.539	6.92077	317.472	30.7633	299.444	17.9074
c'	ENSMUSG00000077239	Snord66	2.40795	1.17504	0.200247	0.200247	0.79999	0.489586	2.39438	0.743626	5.55e-17	0
c'	ENSMUSG00000081491	Gm12778	3.00478	1.48783	0.39869	0.398645	1.98766	0.887634	3.99115	1.05295	0.399017	0.398944
c'	ENSMUSG00000082709	Gm12362	2.38075	0.737643	0.19925	0.199228	0.803878	0.492273	1.59366	0.240822	0.598306	0.398186
c'	ENSMUSG00000084828	Gm12367	17.1085	1.96075	9.27958	2.13311	13.17	1.73557	16.5566	3.22364	11.3345	1.90656
c'	ENSMUSG00000085025	Gm13715	3.37197	2.0146	0.397178	0.397133	1.40047	0.749747	2.98765	0.998367	2.587	0.869972
c'	ENSMUSG00000086363	A330102I10Rik	165.039	13.1519	132.394	13.7315	156.015	4.13216	166.52	11.0862	151.226	9.88612
c'	ENSMUSG00000086687	4930547E08Rik	2.40002	0.992845	0.197502	0.19748	1.20578	0.803898	2.18878	1.0138	1.59065	0.742206
c'	ENSMUSG00000087022	9130024F11Rik	500.066	48.5228	335.465	75.0912	386.025	21.4258	470.048	35.3742	418.087	55.9186
c'	ENSMUSG00000087174	5530601H04Rik	654.289	12.2766	567.631	25.235	592.705	31.1563	652.671	30.9864	595.769	17.588
c'	ENSMUSG00000087563	Gm14205	0.988529	0.624236	5.55e-17	0	5.55e-17	0	1.19336	0.486827	5.55e-17	0
c'	ENSMUSG00000091492	Gm17025	1.39153	0.59371	5.55e-17	0	0.999907	0.631249	1.1971	0.79619	0.797019	0.487955
c'	ENSMUSG00000091556	Gm14569	53.0636	9.27874	21.1564	4.03778	32.7101	3.06164	39.4492	7.35736	25.0822	4.79896
c'	ENSMUSG00000091876	Gm3851	7.99362	2.8668	2.56808	0.590263	3.98971	0.625256	6.58056	1.07549	5.58095	1.94794
c'	ENSMUSG00000092592	Gm20449	13.4983	2.58017	5.53638	1.91626	11.3763	2.66419	12.5561	3.99171	11.14	2.391
c'	ENSMUSG00000095681	Gm8281	38.8393	2.97315	1.38683	0.7378	1.60128	1.12656	7.36893	3.47865	2.79088	1.39275
c'	ENSMUSG00000096789	ENSMUSG00000096789	29.0242	4.48944	19.7883	3.57299	23.9386	1.88711	28.9181	4.49769	25.8778	1.34649
c'	ENSMUSG00000097141	Gm10524	375.328	21.8388	31.8208	1.54978	31.3318	4.04667	44.6416	3.77574	41.4194	5.93999
c'	ENSMUSG00000097330	Gm26672	17.083	4.04414	7.91028	1.50503	10.9705	1.9875	15.5589	1.58773	10.9293	2.73791
c'	ENSMUSG00000097584	1700125G22Rik	2.40485	1.94689	5.55e-17	0	0.79509	0.794434	2.19089	0.662193	0.799593	0.489651
c'	ENSMUSG00000097762	4732463B04Rik	40.4449	2.97497	16.416	3.21721	19.9636	1.79668	24.3348	2.34212	22.686	1.7618
c'	ENSMUSG00000098164	Gm5493	9.1795	2.18115	2.97142	1.25409	5.18615	1.84238	9.16791	0.775515	3.59018	0.977701
c'	ENSMUSG00000099054	Gm27242	5.97898	1.59169	2.57468	0.975596	1.79366	0.489994	5.98387	1.5794	4.77215	1.00598
c'	ENSMUSG00000103044	Gm37307	2.78149	0.785684	5.55e-17	0	0.398941	0.398611	1.20293	0.802645	0.399017	0.398944
c'	ENSMUSG00000104969	Gm43445	77.8475	12.6421	52.7739	3.04443	60.0573	6.1099	76.1564	8.8051	58.5055	4.74456
c'	ENSMUSG00000105138	Mir6964	1.99526	0.627094	5.55e-17	0	0.601208	0.245452	0.797736	0.48827	1.98976	1.09374
d'	ENSMUSG00000022797	Tfrc	4238.85	270.362	2903.39	92.2299	3436.66	96.5412	3205.97	139.849	3609.51	233.057
d'	ENSMUSG00000036353	P2ry12	1629.16	202.821	1003.9	50.711	1249	81.7098	1230.47	90.269	1331.34	216.109
d'	ENSMUSG00000053332	Gas5	828.452	39.2848	639.854	44.6256	750.875	28.573	711.592	27.0903	759.761	30.1209
d'	ENSMUSG00000046748	Tmem45a2	3.9862	0.650463	5.55e-17	0	1.19677	0.795137	5.55e-17	0	2.38786	0.745754
d'	ENSMUSG00000066245	Gm10156	97.6664	5.521	55.5218	6.26357	96.1861	4.64983	72.0436	9.22404	105.19	15.2882
d'	ENSMUSG00000050215	Olfr70	3.37297	1.05907	5.55e-17	0	1.20034	0.49007	0.399486	0.399335	0.793981	0.486093
d'	ENSMUSG00000030096	Slc6a6	5887.49	204.665	5056.97	98.4927	5708.81	201.16	5455.92	149.803	5784.35	202.132
d'	ENSMUSG00000086946	Gm15527	3.19385	1.3621	5.55e-17	0	3.5954	1.9439	0.398167	0.398016	1.59229	0.398104
d'	ENSMUSG00000065226	Gm25791	6.7484	2.52574	0.791892	0.791803	4.18763	2.568	2.78659	0.794349	3.98094	1.37477
d'	ENSMUSG00000000983	Wfdc18	14.7128	2.54187	6.52766	1.71727	13.5639	2.11202	10.3785	1.62453	18.3051	2.209
d'	ENSMUSG00000062591	Tubb4a	29708.9	1273.09	25084.7	1147.51	28444.7	2004.67	27071.2	1476.69	28204.9	1433.05
d'	ENSMUSG00000074507	Gm14340	10.9284	2.35759	3.55792	1.71049	8.78503	1.36684	5.58166	1.93553	9.54911	2.29717
d'	ENSMUSG00000030041	M1ap	4.37269	0.966586	0.395623	0.395578	3.19629	1.48717	1.19838	0.489253	3.38741	1.07468
d'	ENSMUSG00000097628	Gm2383	2.39318	0.922562	0.197502	0.19748	2.39234	0.673891	1.19656	0.488132	2.58446	0.593861
d'	ENSMUSG00000024402	Lta	16.3158	2.5769	7.70552	1.33022	15.7595	2.04165	7.57279	2.1067	15.9225	2.34721
d'	ENSMUSG00000091003	Gm7244	2.77357	1.93757	5.55e-17	0	1.99531	0.626578	0.401449	0.401449	1.59682	0.749027
d'	ENSMUSG00000049699	Ucn2	2.38155	1.92601	5.55e-17	0	2.40098	0.749229	0.401449	0.401449	1.59414	0.74656
d'	ENSMUSG00000102377	Gm37974	5.98076	1.4203	1.18599	0.726305	5.99812	1.78287	2.79555	1.01826	4.37623	0.671001
d'	ENSMUSG00000104040	Gm37563	1.59767	0.399577	5.55e-17	0	1.20034	0.49007	5.55e-17	0	2.18502	0.910057
d'	ENSMUSG00000046774	8030474K03Rik	6.00031	1.69172	0.394833	0.394788	3.98431	1.04105	3.18375	1.14957	9.76957	3.14015
d'	ENSMUSG00000099512	Gm28703	4.34963	1.80845	0.395623	0.395578	6.19982	2.5554	1.20216	0.802454	4.77742	0.737223
d'	ENSMUSG00000046707	Csnk2a2	1526.02	36.9247	1396.75	26.7008	1553.49	54.911	1479.05	21.0829	1549.87	31.786
d'	ENSMUSG00000085763	Smc2os	24.6823	3.44255	15.0396	1.86644	25.1524	2.61616	20.5317	2.01461	28.2331	4.62712
d'	ENSMUSG00000043885	Slc36a4	3592.98	85.9086	3278.07	41.6592	3547.55	80.9488	3518.51	86.2838	3636.38	168.686
d'	ENSMUSG00000087235	Gm4750	2.80129	0.870614	0.39869	0.398645	3.3933	0.680986	2.19077	0.483523	2.98957	2.25326
d'	ENSMUSG00000072974	Gm4787	18.2829	2.39364	10.2848	0.936343	20.9301	3.27185	11.972	2.64671	18.1196	2.0869
d'	ENSMUSG00000093545	Gm5871	2.60654	1.07724	0.397178	0.397133	2.99237	1.17367	1.99476	0.632299	3.78762	1.74233
d'	ENSMUSG00000034781	Gna11	6972.48	92.8379	6513.24	136.677	7085.44	153.23	6760.68	81.926	6944.87	38.3513
d'	ENSMUSG00000056267	Cep70	802.919	33.3672	700.323	34.7873	803.39	47.3101	785.863	47.4078	803.385	26.7598
d'	ENSMUSG00000082404	Gm14799	3.18627	0.799302	0.397178	0.397133	3.19053	1.3472	2.39458	0.973424	5.56527	1.71042
d'	ENSMUSG00000004891	Nes	438.857	39.758	358.636	26.8963	494.227	45.0482	429.901	29.4971	458.554	43.8072
d'	ENSMUSG00000020059	Sycp3	25.523	4.26585	14.4266	3.21287	28.3195	8.05623	24.131	4.27469	31.8412	4.95012
d'	ENSMUSG00000068105	Tnfrsf13c	12.3258	2.43151	6.52775	2.07422	13.1673	1.47894	11.1664	1.19949	13.9618	6.09114
d'	ENSMUSG00000004952	Rasa4	204.788	8.57607	160.976	4.86595	220.48	16.3206	178.24	7.67821	221.533	8.58328
d'	ENSMUSG00000082610	Gm13829	1.1987	0.801433	5.55e-17	0	1.39102	0.594692	0.397775	0.397624	1.1952	0.796056
e'	ENSMUSG00000025993	Slc40a1	444.205	22.5721	280.842	20.5749	356.625	20.7014	338.235	32.8149	341.88	35.4845
e'	ENSMUSG00000023945	Slc5a7	237.381	168.915	29.0678	4.49253	92.0892	25.8082	89.0887	26.9719	80.6115	20.6871
e'	ENSMUSG00000031613	Hpgd	166.325	9.69378	102.782	10.0045	134.993	13.125	131.649	8.48075	151.617	4.73149
e'	ENSMUSG00000097242	Gm16907	42.6765	7.61791	19.7612	2.80659	39.4984	3.04071	32.1162	4.16186	32.4502	2.95462
e'	ENSMUSG00000028989	Angptl7	44.1988	2.65757	22.9421	2.49973	38.5409	3.15471	40.6957	3.22561	50.587	7.16596
e'	ENSMUSG00000053185	Gm9898	3.59907	1.84904	5.55e-17	0	1.59788	0.399532	3.19064	1.34645	3.18638	1.01829
e'	ENSMUSG00000102728	Gm37934	3.97558	1.38972	5.55e-17	0	1.60392	0.75092	2.18902	0.910485	0.99366	0.768744
e'	ENSMUSG00000079357	Gm11100	32.6596	3.09877	16.2233	2.62161	28.7135	4.84509	28.3101	1.29296	28.65	1.47604
e'	ENSMUSG00000083502	Gm14861	3.19003	0.50472	5.55e-17	0	3.98159	1.13015	3.59237	0.753722	2.38942	1.16045
e'	ENSMUSG00000084989	Crocc2	88.1502	15.2212	37.548	5.3134	77.4774	7.99027	63.2195	2.80913	72.812	9.27572
e'	ENSMUSG00000052724	Gm9888	3.56497	1.69866	5.55e-17	0	1.99531	0.626578	0.802684	0.802684	1.59088	0.7424
e'	ENSMUSG00000087612	A230005M16Rik	29.8188	5.35939	11.6747	2.38414	21.7609	2.19182	20.9216	4.17536	21.8784	5.7247
e'	ENSMUSG00000024992	Pde6c	10.5386	6.67017	0.990939	0.625897	7.16926	1.83987	5.17082	2.39855	9.17388	4.20064
e'	ENSMUSG00000097469	Gm26733	3.40075	1.87597	0.197052	0.197029	3.1938	0.587281	3.5944	1.02612	4.97766	1.00056
e'	ENSMUSG00000103423	Gm5845	5.56436	0.959035	1.19322	0.796467	5.38378	1.52046	7.18794	1.89382	9.34597	1.37892
e'	ENSMUSG00000059834	Sclt1	447.578	13.4659	373.177	12.5473	459.142	20.1891	437.365	14.1818	444.467	11.7038
e'	ENSMUSG00000087063	Gm15857	8.96439	2.11473	2.3853	1.21207	6.79132	1.40546	9.37114	2.17132	6.76724	0.803547
e'	ENSMUSG00000067001	Serpinb7	2.38179	0.745087	5.55e-17	0	1.201	0.801701	1.98989	0.627259	2.39321	0.746352
e'	ENSMUSG00000080365	Gm25776	2.18223	0.789042	5.55e-17	0	1.59441	0.742731	0.997188	0.446858	1.19741	0.488852
e'	ENSMUSG00000039264	Gimap3	1.99612	0.636103	5.55e-17	0	1.99942	0.629811	1.59399	0.744486	1.99161	1.5416
e'	ENSMUSG00000031450	Grk1	2.3748	1.91939	5.55e-17	0	2.79477	1.48578	1.9915	1.08851	1.19514	0.797304
e'	ENSMUSG00000099398	Ms4a14	2.39801	0.750503	5.55e-17	0	1.99006	1.54289	1.99604	1.08967	1.99276	0.631398
e'	ENSMUSG00000092539	Gm20468	2.19866	0.800254	5.55e-17	0	2.19096	1.01143	1.59484	1.16392	1.59414	0.74656
e'	ENSMUSG00000079539	Obp2b	1.5887	0.396637	5.55e-17	0	1.20578	0.803898	1.59115	0.743776	2.7923	1.02241
e'	ENSMUSG00000030399	Ckm	3.56838	1.44933	0.394833	0.394788	3.60198	0.982805	3.98481	1.40379	2.59133	1.08024
e'	ENSMUSG00000039419	Cntnap2	6289.42	95.5197	5710.05	89.1699	6413.37	119.633	6345.56	87.155	6431.44	166.969
e'	ENSMUSG00000075224	Lrrc55	709.245	110.224	476.968	56.3771	748.11	77.8357	767.22	91.5001	647.64	95.0503
e'	ENSMUSG00000086459	1700030C12Rik	1.79568	0.491478	5.55e-17	0	3.19038	0.791938	1.20071	0.799345	2.18466	0.792872
e'	ENSMUSG00000103984	Gm37447	8.57715	2.50043	2.77654	1.34703	7.19368	1.50879	7.18045	1.02819	7.15564	1.47708
e'	ENSMUSG00000097235	Gm17250	1.59979	1.17013	5.55e-17	0	1.99503	0.892649	2.9911	1.1784	1.19097	0.793649
e'	ENSMUSG00000086124	A530076I17Rik	5.35712	2.31121	0.800801	0.800801	5.17335	2.13412	4.78484	1.49498	5.56509	2.45845
e'	ENSMUSG00000054200	Ffar4	2.3831	0.747728	5.55e-17	0	3.18769	1.34734	2.18846	0.911603	1.99134	1.99098
e'	ENSMUSG00000034683	Ppp1r1c	1.59208	0.740303	5.55e-17	0	2.79498	1.49992	4.38026	1.59223	1.99345	1.26141
e'	ENSMUSG00000000142	Axin2	1060.21	49.0085	928.149	30.3489	1045.48	38.603	1066.62	33.0071	1111.3	56.5774
e'	ENSMUSG00000032852	Rspo4	10.1248	1.99865	1.19466	0.487731	8.17569	1.67134	7.99569	3.71455	6.97628	3.22279
e'	ENSMUSG00000041479	Syt15	46.297	13.0072	23.0905	4.34753	63.8339	16.8103	62.8797	11.4166	46.564	14.03
e'	ENSMUSG00000078881	Gm14434	41.2958	18.8458	7.12143	1.1085	39.3039	27.1665	89.523	71.3706	160.283	89.2744
e'	ENSMUSG00000082310	Gm12904	1.1901	1.18845	5.55e-17	0	1.99534	0.00798195	1.19413	0.487145	0.796415	0.796269
e'	ENSMUSG00000043346	Gm6741	69.2281	19.3839	37.9582	13.6207	84.5931	12.0086	91.6844	7.33734	95.9214	1.03408
e'	ENSMUSG00000028174	Rpe65	5.56341	1.5913	1.79092	0.794194	5.79434	2.16608	7.18191	2.63486	7.58357	2.56096
e'	ENSMUSG00000038192	Cer1	1.19463	0.792672	5.55e-17	0	3.60748	2.2363	2.79851	1.86277	1.79291	1.19417
e'	ENSMUSG00000085176	Gm15397	2.38104	1.1945	0.395623	0.395578	3.39514	0.686131	2.79188	0.49061	2.39345	0.746861
e'	ENSMUSG00000043727	F830045P16Rik	1.20228	0.805175	5.55e-17	0	1.19271	0.79382	1.39715	0.745084	3.58473	0.751203
e'	ENSMUSG00000102982	Gm38319	3.17244	1.00726	0.394833	0.394788	3.39377	0.876972	3.58494	2.21582	3.97979	1.5096
e'	ENSMUSG00000053528	A530021J07Rik	0.793221	0.578524	5.55e-17	0	0.796984	0.487516	2.59377	0.866212	0.798188	0.488669
f'	ENSMUSG00000021318	Gli3	387.157	38.1344	322.663	12.3607	340.831	15.6516	386.415	16.7228	384.826	18.197
f'	ENSMUSG00000021880	Rnase6	5.56791	1.14614	5.55e-17	0	0.798903	0.489027	1.99354	1.26108	2.18548	1.18975
f'	ENSMUSG00000022622	Acr	29.6694	3.60566	15.423	1.99815	19.9968	5.0126	27.1196	1.98713	28.8716	2.72747
f'	ENSMUSG00000028701	Lurap1	996.363	25.5661	839.928	29.568	867.113	37.1938	960.608	56.1015	952.424	33.2419
f'	ENSMUSG00000029333	ENSMUSG00000029333	1265.46	127.033	959.084	147.153	1152.63	56.7312	1219.06	80.2963	1245.07	83.0256
f'	ENSMUSG00000030048	Gkn3	50.2648	8.64205	22.7164	3.93058	37.9728	9.11117	40.3416	10.1132	58.8405	25.1504
f'	ENSMUSG00000030595	Nfkbib	921.169	24.3862	826.297	22.8964	903.951	43.6372	921.859	18.7255	954.262	19.6963
f'	ENSMUSG00000039046	Usp6nl	1149.71	51.7099	1042.73	12.3658	1141.15	27.6926	1164.65	46.5158	1233.37	25.3978
f'	ENSMUSG00000046341	Gm11223	3859.37	211.86	3215.21	389.922	3381.55	82.1654	3814.93	187.331	3842.91	137.448
f'	ENSMUSG00000053129	Gsx1	21.496	3.61416	6.32314	1.14739	8.38516	1.95004	12.7603	1.82054	14.1356	2.01754
f'	ENSMUSG00000056106	ENSMUSG00000056106	9.15586	1.0755	3.75491	1.76066	7.9917	2.77266	10.3624	1.91941	8.35566	0.73569
f'	ENSMUSG00000056366	Fabp3-ps1	362.51	17.3308	291.512	18.5133	330.38	22.8502	366.221	12.3257	385.703	7.7813
f'	ENSMUSG00000058174	Gm5148	3.57963	0.739405	0.987675	0.440119	2.59635	0.602688	4.38253	1.45896	3.78209	1.61922
f'	ENSMUSG00000060176	Kif27	172.517	14.3627	111.723	6.27632	122.444	7.24525	146.713	6.2456	144.257	10.3331
f'	ENSMUSG00000077734	Snord83b	5.76595	0.894222	1.78317	0.796815	2.98884	1.08881	6.58322	1.53744	7.3603	1.06483
f'	ENSMUSG00000078144	Capns2	4.80981	2.25455	1.19322	0.796467	3.59589	1.32959	6.38219	1.32385	4.17872	0.798825
f'	ENSMUSG00000081242	Gm15719	7.93719	1.95314	2.37443	0.739802	5.19022	1.58915	6.98499	1.49579	7.16012	2.04987
f'	ENSMUSG00000082134	Gm15236	1.20177	0.490706	5.55e-17	0	5.55e-17	0	1.39148	0.973698	1.19159	0.486291
f'	ENSMUSG00000082170	Gm8617	1.5821	0.967046	5.55e-17	0	0.596123	0.396739	0.795867	0.372939	0.995944	0.444596
f'	ENSMUSG00000084144	Gm12516	4.37788	2.30795	5.55e-17	0	0.800872	0.49022	3.59079	1.82478	1.596	0.748926
f'	ENSMUSG00000085078	C030013C21Rik	1.19436	0.792436	5.55e-17	0	0.79999	0.489586	1.1961	0.796224	1.19097	0.793649
f'	ENSMUSG00000085459	Gm12272	1.40362	0.750381	5.55e-17	0	0.397333	0.397003	1.20029	0.801994	1.59507	0.746851
f'	ENSMUSG00000089525	Gm23833	2.39106	0.736818	5.55e-17	0	0.401968	0.401831	1.1929	0.795424	3.19249	1.3549
f'	ENSMUSG00000089989	Gm45713	81.7394	4.09279	57.3473	4.77003	73.0689	7.75068	82.2349	12.1299	79.5897	7.44733
f'	ENSMUSG00000093067	Gm23156	2.17733	1.30876	5.55e-17	0	0.397333	0.397003	1.19838	0.489253	1.00048	0.633113
f'	ENSMUSG00000096370	Gm21992	30.2299	3.05505	15.6358	3.02502	23.5684	2.28923	24.5145	3.1087	28.2675	2.32552
f'	ENSMUSG00000097032	4930539J05Rik	46.3111	7.92318	29.0556	2.57253	39.3086	6.13955	43.9007	6.1311	46.3717	4.43219
f'	ENSMUSG00000097058	ENSMUSG00000097058	1.39399	0.599051	5.55e-17	0	0.397333	0.397003	1.20186	0.800346	2.58544	1.59129
f'	ENSMUSG00000097945	Gm17799	1.39825	0.868372	5.55e-17	0	0.79999	0.489586	1.19898	0.3756	1.59479	0.744516
f'	ENSMUSG00000098128	Gm3693	76.3307	6.45968	53.5403	5.05719	63.0711	4.5424	72.9652	3.1944	73.6346	7.05044
f'	ENSMUSG00000100555	Gm8173	4.41002	2.31762	0.198388	0.198366	1.39764	0.743051	4.37862	1.92766	3.9773	1.40202
g'	ENSMUSG00000001833	43350	17569.7	515.855	15413.8	535.366	15385.1	869.848	16440.1	332.651	16911.4	196.901
g'	ENSMUSG00000005897	Nr2c1	508.249	15.7985	427.308	20.1064	433.17	22.144	423.512	7.54112	487.751	20.0388
g'	ENSMUSG00000014402	Tsg101	2692.46	54.1801	2492.55	41.5684	2443.14	53.0059	2492.48	21.1846	2712.84	90.618
g'	ENSMUSG00000015217	Hmgb3	607.416	69.6747	462.551	21.9584	478.747	24.1338	526.768	13.5238	567.331	29.3254
g'	ENSMUSG00000020311	Erlec1	1813.87	40.6294	1674.94	42.8388	1674.56	19.2395	1738.27	33.45	1805.3	49.4353
g'	ENSMUSG00000020330	Hmmr	49.2535	12.8289	21.7572	4.61091	29.3386	4.97361	27.4802	6.19529	37.7773	6.73665
g'	ENSMUSG00000020694	Tlk2	2827.62	53.2188	2532.91	54.4883	2606.08	85.0098	2603.26	29.4157	2722.57	31.2047
g'	ENSMUSG00000021428	Riok1	642.148	27.9218	561.153	14.4307	611.543	28.7717	623.03	23.9201	638.601	21.5669
g'	ENSMUSG00000022122	Ednrb	2354.32	131.702	2067.76	85.1209	2181.54	81.8293	2066.75	89.2565	2475.5	104.92
g'	ENSMUSG00000022338	Eny2	2136.09	56.4104	1768.24	52.5199	1804.06	80.5635	1877.53	12.0054	1951.23	31.418
g'	ENSMUSG00000023883	Phf10	2145.86	24.6274	1836.21	55.2842	1832.31	76.3252	1899.76	50.8494	2001.05	32.579
g'	ENSMUSG00000024084	Qpct	489.633	21.809	422.867	25.777	459.111	19.2957	479.29	15.6736	517.258	15.5294
g'	ENSMUSG00000025104	Hdgfl3	6077.03	116.497	5418.45	119.007	5490.08	211.158	5691.65	153.943	5862.58	114.14
g'	ENSMUSG00000026358	Rgs1	5.18441	2.64219	0.992768	0.445445	3.2	1.62578	2.79428	1.02284	6.76903	1.02515
g'	ENSMUSG00000026774	4931423N10Rik	8.94464	2.90108	2.78927	1.19801	4.79648	1.50673	4.19095	1.02311	7.77538	2.81286
g'	ENSMUSG00000027499	Pkia	8914.61	320.181	7270.24	50.2624	7060.95	442.658	7692.7	125.858	8004.91	180.169
g'	ENSMUSG00000027669	Gnb4	1317.1	153.808	969.615	48.8589	1165.1	60.9239	1117.01	31.7255	1206.99	42.2937
g'	ENSMUSG00000029563	Foxp2	1005.46	268.134	769.463	97.6026	806	26.5527	804.672	39.6716	990.75	82.2342
g'	ENSMUSG00000029802	Abcg2	690.075	21.6108	576.221	16.8992	606.335	26.8754	615.276	34.0183	677.106	29.1119
g'	ENSMUSG00000030557	Mef2a	9469.89	289.78	8641.04	162.739	9232.43	328.093	8886.98	203.125	9483.94	222.647
g'	ENSMUSG00000030638	Sh3gl3	1825.91	101.095	1517.27	31.2916	1515.5	37.7469	1587.45	40.1682	1680.89	36.5397
g'	ENSMUSG00000030849	Fgfr2	2368.66	136.927	1885.34	46.4484	1998.53	52.9636	1981.48	68.1592	2145.98	98.9851
g'	ENSMUSG00000031167	Rbm3	2545.46	230.502	1747.36	58.7352	1984.91	72.6806	2027.39	48.429	2380.22	300.832
g'	ENSMUSG00000031239	Itm2a	1658.6	147.143	1299.93	51.7425	1477.67	208.464	1438.93	129.709	1707.91	129.704
g'	ENSMUSG00000031843	Mphosph6	536.482	21.1109	457.193	24.7573	433.912	27.4039	444.86	11.6229	543.482	12.488
g'	ENSMUSG00000031878	Nae1	1804.42	41.7128	1452.23	34.6279	1413.34	48.2747	1511.21	27.8978	1586.62	35.4251
g'	ENSMUSG00000032845	Alpk2	26.9963	5.17163	10.2742	3.32938	16.3697	3.20474	10.9658	1.33789	23.8731	4.5551
g'	ENSMUSG00000035486	Plk5	1030.47	66.4535	712.84	38.5145	830.11	32.541	826.604	35.5816	860.395	121.688
g'	ENSMUSG00000037958	Nsrp1	1201.1	28.2228	1058.97	26.26	1122.11	25.8088	1076.22	21.2857	1193.09	28.7658
g'	ENSMUSG00000039478	Micu3	4175.83	68.5621	3805.91	90.1963	3957.42	178.103	3983.45	70.1855	4247.74	127.95
g'	ENSMUSG00000039539	Sgcz	105.297	13.4731	74.0034	5.36141	81.9832	4.9506	94.2938	10.0207	99.1687	8.57989
g'	ENSMUSG00000041769	Ppp2r2d	2762.27	23.9106	2453.87	29.2341	2464.59	52.2493	2441.8	10.2827	2694.22	32.2051
g'	ENSMUSG00000041886	Macc1	3.80444	1.69825	0.985728	0.441798	1.19821	0.488714	3.18969	1.74452	3.97864	0.629356
g'	ENSMUSG00000042208	0610010F05Rik	2231.99	83.3769	1890.92	29.8594	2003.79	85.9439	2014.45	30.1439	2191.33	75.5424
g'	ENSMUSG00000044768	D1Ertd622e	2461.62	98.4253	2189.21	113.417	2214.85	72.7284	2346.78	89.0211	2417.41	28.2623
g'	ENSMUSG00000045193	Cirbp	2772.25	156.114	2101.74	86.4539	2157.24	57.3118	2227.1	45.9647	2432.07	184.444
g'	ENSMUSG00000045624	Esf1	1577.38	19.0643	1399.9	38.0104	1435.86	100.325	1416.16	28.4257	1557.62	32.314
g'	ENSMUSG00000046056	Sbsn	164.111	16.4131	117.485	3.81909	126.793	7.4777	125.97	5.15229	152.709	10.1907
g'	ENSMUSG00000048047	Zbtb33	1380.64	20.1223	1221.2	21.0496	1284.5	79.6213	1350.79	35.23	1373.13	70.1298
g'	ENSMUSG00000048495	Tyw5	459.689	6.92684	383.227	5.21267	410.872	26.6953	432.748	8.98713	436.705	16.7821
g'	ENSMUSG00000048503	Tmem136	911.168	17.5578	799.413	13.4826	854.982	12.2855	866.725	33.6289	888.793	34.9561
g'	ENSMUSG00000055026	Gabrg3	1117.45	85.6815	948.078	29.7335	1004.74	45.8117	1011.81	24.9174	1090.83	35.59
g'	ENSMUSG00000056682	4930465K10Rik	4.17221	0.779004	0.400432	0.400432	0.401968	0.401831	1.59666	0.744229	2.78768	0.493965
g'	ENSMUSG00000059408	Mrgprh	3.22342	2.07156	0.397178	0.397133	2.00323	0.894431	1.20102	0.490322	3.5793	1.1584
g'	ENSMUSG00000067604	Nms	1.98311	1.98039	5.55e-17	0	5.55e-17	0	0.400028	0.399878	1.58981	0.745193
g'	ENSMUSG00000069670	Nkain2	2790.44	57.1801	2317.75	40.0632	2290.91	106.316	2364.43	46.3865	2604.81	61.2116
g'	ENSMUSG00000073242	Dnmt3aos	1.38873	0.738328	5.55e-17	0	0.795318	0.486498	0.397775	0.397624	1.9906	0.891162
g'	ENSMUSG00000076497	Trbj2-7	10.5245	1.62052	4.15659	1.31207	4.58856	1.02139	7.17668	1.45401	9.94465	1.42773
g'	ENSMUSG00000078289	Gm10923	14.7306	3.22312	4.15477	0.662818	6.78351	1.62028	6.58063	1.32815	10.5465	2.37111
g'	ENSMUSG00000078427	Sarnp	568.862	21.0765	470.733	33.8082	443.674	44.2875	517.511	37.3174	583.716	39.2958
g'	ENSMUSG00000078435	AU041133	262.394	17.5686	213.546	12.5233	224.862	17.2735	226.879	10.6399	260.352	9.84858
g'	ENSMUSG00000078903	Gm14391	261.518	60.7972	119.814	21.9406	114.906	32.1363	80.3085	12.4526	223.66	49.1359
g'	ENSMUSG00000079278	Tmem233	3.2017	1.87167	5.55e-17	0	0.401968	0.401831	0.398167	0.398016	1.19525	0.487976
g'	ENSMUSG00000079666	1700015F17Rik	3.36163	2.01694	0.394833	0.394788	1.99676	0.894933	1.19973	0.801858	2.78468	0.794629
g'	ENSMUSG00000080059	Rps19-ps3	297.796	12.1314	234.829	10.3142	235.2	9.59801	243.871	12.015	292.327	7.73223
g'	ENSMUSG00000081071	Gm9836	66.6588	4.36482	48.9949	5.17763	60.7831	8.40926	54.8345	1.67132	69.8232	6.67985
g'	ENSMUSG00000082108	Gm13777	1.6047	1.17576	5.55e-17	0	0.199237	0.199072	0.397775	0.397624	2.79006	1.49355
g'	ENSMUSG00000084408	Gm11870	25.4645	2.63696	12.4701	2.71833	16.7713	4.35102	20.3457	4.71745	22.4883	2.22181
g'	ENSMUSG00000084785	Gm13972	1.19146	0.485557	5.55e-17	0	0.401968	0.401831	0.401449	0.401449	1.99351	1.09756
g'	ENSMUSG00000085192	Gm12195	8.74624	2.2921	1.98852	1.25852	2.58998	1.39401	3.78775	0.731069	7.17774	2.88009
g'	ENSMUSG00000085771	C230066G23Rik	1.98547	0.626544	5.55e-17	0	0.803662	0.80339	0.397775	0.397624	2.19768	1.19811
g'	ENSMUSG00000086308	G630016G05Rik	44.2548	7.57455	20.5579	1.84167	24.133	3.92643	24.5209	3.522	37.0187	1.66885
g'	ENSMUSG00000086575	Gm14104	6.00101	1.78115	1.97742	0.318427	3.58733	1.12077	4.98788	1.48342	5.98277	2.47671
g'	ENSMUSG00000086837	Gm16618	32.4576	1.68441	21.752	1.97409	26.3735	3.4632	23.7339	3.1463	34.4461	3.27447
g'	ENSMUSG00000091457	Gm17171	3.38696	0.522364	5.55e-17	0	0.199237	0.199072	5.55e-17	0	0.800212	0.490029
g'	ENSMUSG00000092353	Gm20539	1.19371	0.487002	5.55e-17	0	0.79999	0.489586	5.55e-17	0	1.39818	0.746607
g'	ENSMUSG00000093930	Hmgcs1	8643.21	285.231	7687.1	302.532	8168.88	165.939	8002.16	199.732	8453.34	197.934
g'	ENSMUSG00000095134	Mid1-ps1	12.9461	1.61722	4.14308	2.74598	3.38369	1.01653	8.56223	3.28737	13.5572	6.11281
g'	ENSMUSG00000095224	F930015N05Rik	0.793233	0.792124	5.55e-17	0	0.401466	0.401272	0.198946	0.198871	2.19253	0.795654
g'	ENSMUSG00000095803	ENSMUSG00000095803	4.18689	1.0764	0.600616	0.600616	2.59556	0.511633	2.38994	0.805697	4.38695	2.91837
g'	ENSMUSG00000096999	Gm26793	63.3106	3.41155	27.6592	4.35552	27.1043	5.72152	31.1117	2.97861	43.5814	6.39951
g'	ENSMUSG00000097763	Gm26636	1.39177	0.59387	5.55e-17	0	0.398941	0.398611	0.400028	0.399878	1.59822	0.747259
g'	ENSMUSG00000098101	Gm27006	3.60803	1.84144	0.797034	0.488092	1.60136	0.750595	5.55e-17	0	3.58062	0.744846
g'	ENSMUSG00000099375	Gm28187	12.7468	2.71645	1.58207	0.739066	2.4003	0.747855	3.5857	1.15636	5.77694	2.2407
g'	ENSMUSG00000099875	Rbm3-ps	100.635	12.2711	57.7335	3.47662	75.5725	5.71203	76.1374	7.38801	95.7739	22.0775
g'	ENSMUSG00000100701	Gm19587	33.2396	4.42107	19.9625	3.658	20.9616	3.6328	27.5066	4.40285	39.8013	0.886882
g'	ENSMUSG00000103800	Pcdha8	32.0726	2.28201	15.449	4.5247	25.1215	3.81629	22.1513	3.31398	29.2511	2.93465

## Sheet: Recov_revV_LPS
			SAMR1/water/LPS		SAMP8/water/LPS		SAMP8/KS/LPS		SAMP8/NKS/LPS		SAMP8/HJG/LPS
Category	Gene_ID	Gene_name	AVG	SEM	AVG	SEM	AVG	SEM	AVG	SEM	AVG	SEM
h'	ENSMUSG00000078861	Zfp931	194.487	12.6593	569.53	19.8563	461.931	42.3803	498.847	13.3669	532.09	21.9211
h'	ENSMUSG00000048307	Ankrd46	7350.15	93.1699	10582.5	180.512	9850.51	385.492	10308.5	176.701	10135.9	286.099
h'	ENSMUSG00000090691	Gm3667	1.18917	0.574642	40.5757	6.10298	21.7542	2.55529	37.8777	6.627	44.3553	4.31804
h'	ENSMUSG00000020962	Gtf2a1	872.465	29.9893	1359.54	42.1005	1163.25	84.229	1295.48	9.24881	1320.49	48.891
h'	ENSMUSG00000049999	Ppp1r3d	230.297	7.83423	375.521	8.72451	313.595	11.2498	382.243	15.771	376.364	10.074
h'	ENSMUSG00000021904	Sema3g	252.919	13.8754	475.033	31.9352	376.57	16.27	396.525	47.0121	393.724	34.2301
h'	ENSMUSG00000044715	Gskip	1122.51	34.8981	1458.78	28.8168	1328.87	51.4517	1381.14	28.4166	1437.64	17.3429
h'	ENSMUSG00000028419	Chmp5	3068.5	56.9367	3832.21	34.5726	3503.25	145.192	3734.29	35.399	3855.4	141.988
h'	ENSMUSG00000060802	B2m	1907.31	95.1521	3230.5	127.841	2647.62	177.907	2857.5	224.962	2710.27	279.593
h'	ENSMUSG00000080888	Gm14387	2.58609	1.06045	16.5922	3.20378	8.38037	1.12559	14.1614	2.13332	15.9186	2.24996
h'	ENSMUSG00000064246	Chil1	443.843	24.5293	922.27	109.341	652.86	86.5812	857.278	266.439	815.197	117.323
h'	ENSMUSG00000047875	Gpr157	89.1122	6.88817	149.995	6.81015	117.727	9.96234	143.379	7.42432	148.794	8.96016
h'	ENSMUSG00000067212	H2-T23	272.42	18.5919	532.909	19.7614	380.204	33.6451	477.613	81.879	456.301	52.6105
h'	ENSMUSG00000027907	S100a11	67.5703	8.31265	148.651	8.28845	100.899	10.1402	127.505	15.6526	116.107	23.3411
h'	ENSMUSG00000079018	Ly6c1	1241.27	107.626	2270.92	76.0046	1605.41	220.995	1839.03	201.56	1755.52	269.556
h'	ENSMUSG00000094695	Gm21953	34.3885	10.1492	123.868	30.7127	68.6711	10.9436	90.6816	27.7911	74.435	9.94213
h'	ENSMUSG00000003814	Calr	15552.1	799.433	19590.6	191.702	17419.9	858.466	18416.8	301.138	18410	1266.02
h'	ENSMUSG00000068220	Lgals1	365.811	22.4707	546.869	25.8191	416.001	49.8505	478.056	21.4584	512.422	22.7496
h'	ENSMUSG00000000958	Slc7a7	77.9981	9.84832	134.008	7.5795	96.9239	6.12182	126.157	13.4452	120.172	5.56947
h'	ENSMUSG00000023224	Serping1	290.159	16.1206	460.052	53.7173	350.86	16.0187	378.564	48.8332	382.642	26.3783
h'	ENSMUSG00000024087	Cyp1b1	209.215	9.90226	327.224	37.2958	205.999	29.6696	264.836	20.2573	268.897	8.13242
h'	ENSMUSG00000046834	Krt1	157.719	12.6152	244.073	20.8227	187.875	22.1433	220.072	12.3274	255.414	21.4466
h'	ENSMUSG00000031610	Scrg1	1006.88	66.2767	1326.98	77.8925	1099.39	51.8386	1250.95	66.8765	1236.46	81.4012
h'	ENSMUSG00000035004	Igsf6	32.8588	4.4922	86.4802	15.9321	48.8287	6.68376	65.9771	5.80567	63.618	12.8584
h'	ENSMUSG00000017390	Aldoc	30422.9	902.294	35885.9	1218.18	32650.4	1070.16	33319.8	729.942	33225.9	1331.58
h'	ENSMUSG00000029163	Emilin1	116.649	12.7086	181.558	20.3149	141.544	9.51514	150.226	14.9001	154.054	9.1207
h'	ENSMUSG00000040883	Tmem205	579.229	26.3685	740.568	27.2054	639.713	48.1116	704.073	18.3922	721.904	48.7809
h'	ENSMUSG00000042842	Serpinb6b	52.6638	5.66735	98.995	9.90286	60.6412	5.68568	84.1107	7.88599	83.7635	6.31335
h'	ENSMUSG00000057123	Gja5	16.1121	1.31225	36.5543	3.28283	23.5388	1.71298	27.9064	2.99547	25.4418	5.94203
h'	ENSMUSG00000074607	Tox2	1188.73	34.3592	1502.73	63.9212	1288.47	63.4142	1346.11	45.9051	1404.49	74.1002
h'	ENSMUSG00000001029	Icam2	89.1803	10.8615	141.598	8.97304	103.688	6.50075	135.694	11.2794	118.909	11.475
h'	ENSMUSG00000042485	Mustn1	48.0816	6.35752	91.0975	9.63992	47.2945	6.45833	68.9356	8.24078	64.8418	8.73665
h'	ENSMUSG00000025225	Nfkb2	189.996	10.5695	272.325	5.87738	211.133	7.09937	243.027	14.1176	225.16	20.6067
h'	ENSMUSG00000029605	Oas1b	12.7359	1.49451	30.0927	5.74776	16.9504	2.54968	25.9149	4.40578	19.504	2.63709
h'	ENSMUSG00000024982	Zdhhc6	974.99	16.4784	1112.56	14.1791	1008.82	22.7986	1072.91	22.8258	1100.55	37.7465
h'	ENSMUSG00000030879	Mrpl17	1255.74	21.0565	1469.9	45.281	1284.09	75.8595	1353.95	39.5336	1422.13	22.0394
h'	ENSMUSG00000024679	Ms4a6d	68.9067	11.4557	171.547	16.3839	99.6142	19.8938	116.505	19.194	119.073	26.6955
h'	ENSMUSG00000030560	Ctsc	732.138	85.4985	1116.19	78.6761	843.963	70.3979	876.399	54.7416	877.93	132.826
h'	ENSMUSG00000032036	Kirrel3	1910.99	125.167	2341.04	82.432	2014.17	53.2494	2074.7	106.881	2150.7	79.2522
h'	ENSMUSG00000017697	Ada	26.0514	2.4488	51.9433	6.83583	33.9184	6.67445	51.6397	7.94916	36.3997	3.32336
h'	ENSMUSG00000023186	Vwa5a	786.196	8.80969	946.345	39.8626	842.105	44.9063	904.09	41.6908	851.463	32.9027
h'	ENSMUSG00000010607	Pigyl	685.038	19.5106	861.585	38.0948	740.36	71.4271	859.573	26.2413	818.014	40.2208
h'	ENSMUSG00000001948	Spa17	68.2185	8.07095	101.995	6.28796	78.1714	7.15319	91.1025	7.8948	86.5708	7.70005
h'	ENSMUSG00000091561	Gm6665	10.7706	1.88054	23.2961	3.63267	13.3681	3.39748	24.7059	4.88214	20.6802	3.6227
h'	ENSMUSG00000004044	Cavin1	950.331	25.1442	1110.7	26.502	976.938	42.5315	1028.68	21.9615	1038.26	43.1802
h'	ENSMUSG00000031765	Mt1	6558.29	345.313	8138.75	501.377	6992.62	433.582	7688.33	311.812	7343.4	703.46
h'	ENSMUSG00000057103	Nat8f1	194.618	12.9747	259.49	14.7662	206.663	11.7259	227.851	6.4277	253.968	22.0192
h'	ENSMUSG00000038954	Supt3	404.025	23.4708	486.314	27.6494	408.048	15.7362	442.081	20.5375	467.778	19.4603
h'	ENSMUSG00000037762	Slc16a9	100.183	8.14612	140.824	15.6892	100.493	8.50573	110.05	8.33832	113.664	7.26639
h'	ENSMUSG00000037706	Cd81	10398.3	316.398	11627.7	238.947	10659.5	501.133	11366.3	162.251	11441.1	361.753
h'	ENSMUSG00000027122	Arl14ep	1710.48	39.6254	1883.54	46.5322	1734.14	39.8626	1765.34	25.4256	1826.27	26.1019
h'	ENSMUSG00000020077	Srgn	367.1	23.3566	515.265	28.4019	399.417	41.9441	410.381	18.7677	440.343	55.9294
h'	ENSMUSG00000002289	Angptl4	109.056	17.5703	168.015	18.5353	120.559	19.9832	150.26	13.1787	148.763	17.7015
h'	ENSMUSG00000026068	Il18rap	5.19073	1.7413	23.1077	5.58233	6.57037	2.15497	9.55867	3.94472	14.1261	5.34282
h'	ENSMUSG00000041625	Ggact	580.068	9.31338	688.909	22.8686	597.786	48.5399	644.622	4.40005	649.65	17.2542
h'	ENSMUSG00000062980	Cped1	134.755	17.5306	182.894	7.45731	143.844	4.54212	161.712	11.6287	155.625	16.6346
h'	ENSMUSG00000021903	Galnt15	105.038	5.98274	147.972	10.1451	100.368	7.0609	135.73	18.8436	114.058	7.6966
h'	ENSMUSG00000024610	Cd74	93.0711	4.52765	140.684	12.9989	100.122	5.71142	131.41	31.4313	105.107	5.76973
h'	ENSMUSG00000030317	Timp4	1289.09	93.226	1652.24	96.4138	1331.27	130.644	1408.21	106.98	1433.28	163.702
h'	ENSMUSG00000039956	Mrap	5.99027	1.44866	13.8484	2.7427	6.38662	0.750634	7.96811	2.58827	14.7184	1.45475
h'	ENSMUSG00000030062	Rpn1	6085.7	146.956	6620.11	64.7889	6118.97	164.568	6451.95	60.7139	6436.9	211.886
h'	ENSMUSG00000004328	Hif3a	197.275	39.4725	337.7	59.2424	161.42	19.804	252.519	44.9424	223.903	62.8855
h'	ENSMUSG00000031431	Tsc22d3	2461.83	115.316	2858.97	186.305	2489.34	95.2449	2732.85	101.225	2796.88	123.42
h'	ENSMUSG00000025351	Cd63	1944.06	63.0066	2275.12	110.216	1901.54	153.313	2128.63	31.5615	2117.65	89.5023
h'	ENSMUSG00000031119	Gpc4	826.804	71.3281	1011.93	73.451	849.229	33.0445	906.316	52.7111	909.948	21.3256
h'	ENSMUSG00000000154	Slc22a18	18.4393	4.96399	32.6467	2.92425	15.9471	4.12175	31.0998	3.1683	24.0961	4.01543
h'	ENSMUSG00000071856	Mcc	438.864	5.04547	529.391	19.2743	447.081	24.3118	454.534	22.6774	477.364	37.8525
h'	ENSMUSG00000016255	Tubb1	5.55e-17	0	1.18699	0.484635	5.55e-17	0	3.59489	1.16282	1.99202	1.25791
h'	ENSMUSG00000031224	Magee2	417.355	24.5277	498.672	33.2947	413.787	11.8547	443.779	29.4784	459.01	25.225
h'	ENSMUSG00000028413	B4galt1	309.522	18.3812	383.026	22.7335	317.634	21.6083	348.853	28.1603	335.646	20.5949
h'	ENSMUSG00000091993	B930036N10Rik	2.3748	1.91939	8.69106	1.46674	2.79676	1.01758	3.80019	1.63143	4.37474	1.45557
h'	ENSMUSG00000026687	Aldh9a1	1370.56	38.5889	1536.08	40.8328	1373.76	71.2948	1461.12	20.4833	1399.05	44.651
h'	ENSMUSG00000050930	Map10	215.361	9.1921	269.733	16.7555	220.199	16.6109	240.566	12.7891	238.135	16.4919
h'	ENSMUSG00000107369	Gstm2-ps1	123.004	11.3376	156.119	13.4746	122.865	9.68991	141.167	5.44047	152.614	6.62375
h'	ENSMUSG00000025935	Tram1	1342.24	40.0258	1512.48	39.8735	1312.76	79.1614	1433.75	53.9177	1403.25	60.0297
h'	ENSMUSG00000049630	C1ql3	1596.37	149.984	1915.97	125.824	1545.76	123.967	1744.78	82.4675	1927.72	80.0275
h'	ENSMUSG00000022894	Adamts5	88.6354	9.30801	114.896	3.39688	89.9247	8.16227	121.152	11.8699	105.115	6.39614
h'	ENSMUSG00000022548	Apod	8187.54	756.543	11068.6	757.684	8343.41	784.97	9161.33	1092.05	9662.78	1493.22
h'	ENSMUSG00000068523	Gng5	544.615	29.6589	627.116	26.4985	520.906	31.6943	591.882	17.4177	621.894	17.9904
h'	ENSMUSG00000091199	Gm2619	5.55e-17	0	1.98377	1.08701	5.55e-17	0	1.99813	1.09519	0.198309	0.198272
h'	ENSMUSG00000023940	Sgo1	14.3418	3.33543	25.33	5.31476	14.7583	1.46321	19.3382	1.14055	20.6875	3.4181
h'	ENSMUSG00000036854	Hspb6	161.984	10.2596	209.074	17.0708	165.018	17.8415	189.977	8.64047	192.909	28.5903
h'	ENSMUSG00000105944	Gm5075	13.3464	1.38153	22.7402	0.624189	13.7602	1.06823	11.7578	1.78042	14.7276	2.34755
h'	ENSMUSG00000035187	Nkx6-1	8.32112	2.5944	15.0207	1.55626	6.77277	1.93397	13.159	1.61709	16.9197	2.15345
h'	ENSMUSG00000098449	Gm7467	37.9701	4.7713	57.773	9.16685	34.1117	6.51863	45.4984	4.77722	39.607	4.50248
h'	ENSMUSG00000032235	Ice2	428.303	11.0936	486.731	19.0114	424.366	29.5167	441.272	14.812	446.061	15.0855
h'	ENSMUSG00000027233	Patl2	2.78604	1.84125	8.50196	1.38114	2.99652	0.457627	3.18875	0.794543	7.1776	3.27567
h'	ENSMUSG00000001418	Glmp	1432.78	45.2243	1566.73	54.8343	1437.08	45.1283	1511.61	27.3646	1471.41	52.3062
h'	ENSMUSG00000034793	G6pc3	2136.64	36.8987	2315.15	41.7196	2125.89	49.6347	2222.56	55.0074	2178.37	34.6792
h'	ENSMUSG00000064337	mt-Rnr1	10.3321	1.37917	17.3964	3.17671	8.1693	1.79499	11.5583	2.71063	11.1477	1.47106
h'	ENSMUSG00000101223	4930568A12Rik	5.55e-17	0	1.58698	0.742145	5.55e-17	0	1.19263	0.794839	0.997474	0.447353
h'	ENSMUSG00000006519	Cyba	292.083	26.4539	382.701	26.5948	295.61	39.2609	334.655	23.2249	331.312	36.3445
h'	ENSMUSG00000069270	Hist1h2ac	1.19896	0.37529	4.95945	1.29169	0.803662	0.80339	2.79266	1.1494	4.37796	1.46824
h'	ENSMUSG00000048550	Thnsl1	973.037	30.2259	1083.4	22.6055	967.637	52.8926	1117.1	27.1288	1101.24	35.5583
h'	ENSMUSG00000063172	Hspb11	214.829	8.3392	256.173	20.3644	216.396	10.1311	232.015	17.154	247.837	9.47762
h'	ENSMUSG00000073460	Pnldc1	26.6626	1.87775	41.5483	3.0839	24.9722	4.61615	37.0445	6.29293	43.9997	5.46849
h'	ENSMUSG00000094515	Gm24567	5.55e-17	0	0.989732	0.441271	5.55e-17	0	1.79462	0.662643	0.798188	0.488669
h'	ENSMUSG00000031448	Adprhl1	8.13945	1.74928	17.2189	2.35093	7.97101	1.38468	11.5821	3.11133	11.538	3.10617
h'	ENSMUSG00000042312	S100a13	382.814	41.5054	470.614	21.661	361.552	42.3368	400.459	19.4217	442.08	33.2322
h'	ENSMUSG00000017009	Sdc4	2117.86	115.133	2453.34	115.112	1993.88	165.61	2259.81	105.221	2288.04	182.058
h'	ENSMUSG00000107214	4930500F04Rik	5.55e-17	0	1.97765	1.52961	5.55e-17	0	1.99232	0.628533	1.19231	0.486587
h'	ENSMUSG00000082369	Gm14208	5.55e-17	0	1.98679	1.25407	5.55e-17	0	1.60041	1.1646	0.798424	0.48894
h'	ENSMUSG00000038541	Srd5a2	0.797667	0.487888	4.74795	0.499974	0.803878	0.492273	2.39791	1.46946	3.98203	1.25648
h'	ENSMUSG00000045284	Dcaf12l1	2612.84	85.9639	2860.94	110.169	2495.84	111.184	2794.82	48.7058	2857.82	86.342
h'	ENSMUSG00000004748	Mtfp1	3365.43	169.433	3770.25	146.65	3372.41	170.52	3540.54	71.3612	3634.46	138.301
h'	ENSMUSG00000040767	Snrnp25	507.305	24.6125	596.24	23.6409	486.517	60.5631	571.033	11.6532	570.95	29.9163
h'	ENSMUSG00000091114	Gm3138	5.55e-17	0	0.988199	0.441213	5.55e-17	0	1.19733	0.584131	0.199724	0.199687
h'	ENSMUSG00000101875	Gm6028	5.55e-17	0	2.37179	0.964249	5.55e-17	0	0.79762	0.581945	0.399524	0.39945
h'	ENSMUSG00000039518	Cdsn	15.5458	5.88969	27.5234	5.39923	15.18	2.75315	25.3088	4.15199	17.5079	2.39853
h'	ENSMUSG00000105082	Aqp10-ps	1.19365	0.486438	5.15006	1.9642	0.800872	0.49022	0.801659	0.490916	2.39345	0.746861
h'	ENSMUSG00000024270	Slc39a6	2967.46	121.1	3242.12	124.649	2847.86	96.0288	3028.48	69.3024	3077.47	41.929
h'	ENSMUSG00000024517	Grp	417.504	65.7326	572.964	36.7708	403.509	38.8391	429.524	38.7075	498.274	22.1281
h'	ENSMUSG00000051920	Rspo2	631.511	80.0227	789.455	65.0343	586.37	22.3655	676.917	43.1891	751.206	66.8229
i'	ENSMUSG00000020932	Gfap	14758.3	336.649	28833.7	2279.59	23401.3	1573.79	22221.5	1047.62	24424	2950.51
i'	ENSMUSG00000045502	Hcar2	22.8795	6.76695	148.977	15.3699	85.7149	12.7814	84.4231	22.3945	89.2607	21.4503
i'	ENSMUSG00000022906	Parp9	120.248	8.13545	214.104	8.95537	149.229	2.84775	159.512	7.54708	176.633	12.7576
i'	ENSMUSG00000040552	C3ar1	84.1122	12.2913	225.447	13.6024	148.568	14.1138	152.698	9.45244	173.758	31.6907
i'	ENSMUSG00000003617	Cp	800.35	71.3713	1492.25	161.21	1105.83	124.469	1126.01	143.989	1191.7	175.386
i'	ENSMUSG00000001506	Col1a1	389.647	30.2001	627.777	32.7155	470.582	29.9889	491.631	50.6692	556.015	60.8087
i'	ENSMUSG00000029304	Spp1	208.958	48.5857	504.73	67.4265	306.513	51.2836	285.477	39.2402	411.542	95.0376
i'	ENSMUSG00000025044	Msr1	34.8469	6.4576	131.665	25.7717	68.3835	12.7917	60.9839	10.7189	83.729	25.0188
i'	ENSMUSG00000027962	Vcam1	1064.94	53.9694	1359.49	63.4111	1197.34	20.4384	1156.85	50.7963	1264.56	107.611
i'	ENSMUSG00000001761	Smo	1088.06	51.9795	1481.6	175.234	1233.41	41.1053	1241.73	59.0173	1314.57	47.3836
i'	ENSMUSG00000036185	Sapcd1	4.37222	1.68043	15.4103	1.85499	7.38936	1.98449	7.9758	1.69812	8.74831	2.33096
i'	ENSMUSG00000047786	Lix1	1543.42	83.1142	1801.74	54.9439	1633.24	81.0697	1598.56	42.4558	1815.3	30.3972
i'	ENSMUSG00000032419	Tbx18	63.4188	5.50101	97.2224	9.75353	67.4843	5.19048	72.5788	4.22606	86.9878	8.88652
i'	ENSMUSG00000004709	Cd244	22.8829	4.13088	50.604	6.37161	21.9452	4.04559	24.7083	5.6981	32.4313	6.42192
i'	ENSMUSG00000016481	Cr1l	851.882	45.2984	960.708	14.3097	836.259	36.7288	873.347	27.5251	900.015	11.7106
i'	ENSMUSG00000063018	2010204K13Rik	467.299	26.7954	582.581	40.869	416.584	33.645	478.996	26.9471	504.319	38.1487
i'	ENSMUSG00000052485	Tmem171	14.6778	5.47401	29.4217	3.99188	10.3824	2.03073	16.3464	1.44462	24.0763	4.55812
i'	ENSMUSG00000026043	Col3a1	177.969	20.0037	247.843	28.8539	170.549	11.9735	165.799	20.0714	200.769	27.3764
i'	ENSMUSG00000027955	Fam198b	332.248	13.614	411.489	36.354	316.207	34.6392	324.87	20.3531	373.716	18.578
i'	ENSMUSG00000024154	Gtf2a1l	10.9508	1.60668	19.7613	3.40786	10.7643	2.15145	8.38503	2.21646	16.5293	3.14318
i'	ENSMUSG00000086254	3100003L05Rik	1.59747	0.39953	5.14026	0.961893	1.19907	0.801229	1.19926	0.799471	3.18338	1.19885
i'	ENSMUSG00000097428	AW047730	350.616	19.8575	415.257	15.6623	343.021	25.3779	345.34	25.8196	356.958	12.3342
j'	ENSMUSG00000000340	Dbt	879.674	34.6074	982.182	52.0675	889.368	47.3966	869.435	31.8883	902.523	27.0956
j'	ENSMUSG00000000628	Hk2	216.203	29.3545	305.168	8.67279	257.39	11.2445	240.948	21.3698	254.194	21.9456
j'	ENSMUSG00000001131	Timp1	20.8705	7.93442	101.201	9.417	49.4465	10.6296	42.4632	9.9823	51.9156	14.6581
j'	ENSMUSG00000001349	Cnn1	16.1189	3.38302	35.9621	4.46186	30.1648	5.59288	20.5441	4.34814	32.4469	1.66222
j'	ENSMUSG00000005950	P2rx5	60.1093	10.559	109.765	21.1932	100.444	7.18729	73.5508	8.32621	98.7711	13.391
j'	ENSMUSG00000018983	E2f2	72.1035	8.02238	100.988	10.2143	79.4152	5.14525	69.4366	6.20514	79.7274	11.2407
j'	ENSMUSG00000019808	Adat2	219.483	8.20415	371.843	11.6784	340.645	10.5244	323.968	11.7463	336.022	15.1011
j'	ENSMUSG00000019929	Dcn	1178.86	314.824	2452.37	384.319	1737.42	86.3851	1433.56	115.412	1767.62	158.388
j'	ENSMUSG00000020303	Stc2	96.3053	10.25	129.12	17.2019	122.186	6.19122	95.2942	3.10397	102.743	10.0478
j'	ENSMUSG00000020734	Grin2c	2085.71	46.1584	2364.1	67.3317	2194.62	47.3344	2096.8	78.5635	2227.68	68.9521
j'	ENSMUSG00000021091	Serpina3n	3572.28	226.029	7062.49	837.171	5720.86	316.396	5186.09	387.718	6086.11	924.239
j'	ENSMUSG00000021609	Slc6a3	15.1027	6.46616	270.41	130.585	558.286	359.867	18.5074	7.35113	144.783	64.4788
j'	ENSMUSG00000022150	Dab2	377.178	13.7421	474.22	19.9567	428.932	11.1423	401.704	14.9633	425.73	12.652
j'	ENSMUSG00000024011	Pi16	53.0442	8.02346	84.6457	7.87718	78.0468	5.41456	61.7981	4.4859	65.8336	5.51756
j'	ENSMUSG00000024691	Fam111a	205.955	33.3699	354.526	10.3949	280.156	15.4474	249.96	30.4931	305.907	49.4722
j'	ENSMUSG00000026365	Cfh	1600.03	99.5747	2264.82	141.252	1928.56	104.583	1850.18	82.3484	1916.7	203.354
j'	ENSMUSG00000027995	Tlr2	112.981	18.3914	221.897	15.4873	173.744	21.2588	152.12	16.3145	160.208	25.218
j'	ENSMUSG00000028459	Cd72	11.9451	3.8497	33.5708	11.4379	19.1453	4.32307	14.7532	0.843683	16.5088	5.19895
j'	ENSMUSG00000029700	Slc13a1	1.79301	0.671018	11.0941	3.03111	6.59555	2.41643	4.38926	1.70967	5.97297	1.41278
j'	ENSMUSG00000029772	Ahcyl2	8906.36	218.856	10517.1	468.574	9773.23	228.601	9534.84	241.873	9740.88	255.036
j'	ENSMUSG00000029915	Clec5a	92.1345	13.4632	147.214	9.61275	122.226	9.62475	87.8642	11.1901	133.462	13.1333
j'	ENSMUSG00000030237	Slco1a4	1636.06	68.8075	2303.13	59.9426	2212.84	137.193	2023.65	71.3005	2221.86	183.075
j'	ENSMUSG00000030525	Chrna7	850.169	53.1355	1056.07	107.239	1058.68	22.5019	879.645	38.3565	961.866	48.5214
j'	ENSMUSG00000031785	Adgrg1	3688.7	205.227	4312.36	153.614	3836.48	272.685	3697.76	165.73	3861.75	97.9401
j'	ENSMUSG00000031849	Comp	21.8578	4.13452	38.9603	3.35023	34.9501	4.03516	24.3176	5.47354	30.0594	2.51513
j'	ENSMUSG00000034394	Lif	12.1347	2.42183	30.0431	3.95174	28.155	4.81159	16.1584	1.92954	24.694	3.97409
j'	ENSMUSG00000035042	Ccl5	7.55445	1.5748	59.2205	20.0073	20.753	4.5285	13.7525	4.10888	33.4035	11.0951
j'	ENSMUSG00000037447	Arid5a	429.665	25.9037	520.455	36.7007	554.341	29.962	426.214	11.6658	478.64	31.3972
j'	ENSMUSG00000038387	Rras	322.942	10.9052	393.329	20.8887	392.766	8.3922	334.586	3.92035	380.795	17.6933
j'	ENSMUSG00000039492	Ccdc27	16.0851	2.45609	30.4242	3.69015	27.9569	6.95309	19.9529	3.02291	21.687	3.07929
j'	ENSMUSG00000039942	Ptger4	138.648	10.9844	208.471	15.4322	196.273	14.5093	142.182	19.4581	201.168	11.789
j'	ENSMUSG00000040533	Matn1	10.7415	3.42071	26.8915	6.31313	24.886	6.84649	11.3562	2.00911	15.7124	4.30792
j'	ENSMUSG00000040713	Creg1	1352.36	62.9049	1499.47	42.2332	1408.71	32.7472	1354.67	40.4825	1453.41	47.6823
j'	ENSMUSG00000041688	Amot	1158.36	29.6812	1496.93	72.608	1396.48	39.9378	1303.45	62.7841	1428.68	57.5673
j'	ENSMUSG00000045608	Dbx2	699.883	30.037	813.203	27.9287	744.375	34.6821	725.635	7.68234	863.026	19.2376
j'	ENSMUSG00000045946	ENSMUSG00000045946	11.7572	2.03504	20.7686	2.59661	18.1732	1.96113	11.3743	3.09459	14.5202	1.12433
j'	ENSMUSG00000046245	Pilra	39.3854	8.47953	75.8019	8.215	56.2118	7.08982	42.4375	6.29967	47.5322	9.70039
j'	ENSMUSG00000046733	Gprc5a	4.36692	1.00221	10.6715	2.92232	8.56961	1.44001	4.58874	2.08355	13.7268	2.99674
j'	ENSMUSG00000046768	Rhoj	164.839	10.8872	274.275	23.7251	245.526	15.4595	217.211	15.718	229.682	19.4582
j'	ENSMUSG00000051497	Kcnj16	755.544	22.2681	974.979	82.6484	911.724	14.7659	832.721	38.29	916.27	37.3678
j'	ENSMUSG00000051906	Cd209f	22.849	5.2721	41.9182	6.31018	26.9168	6.97351	19.1458	2.24663	28.0314	4.31876
j'	ENSMUSG00000058665	En1	0.792358	0.484315	14.5864	5.74934	31.2497	19.6564	0.401449	0.401449	9.97419	6.12714
j'	ENSMUSG00000060402	Chst8	1178.49	100.614	1440.65	62.1301	1454.95	109.098	1250.87	35.766	1286.86	61.3963
j'	ENSMUSG00000066684	Pilrb1	9.16248	3.39401	22.3441	5.02937	10.9784	3.41173	6.97606	0.694387	11.3375	3.71383
j'	ENSMUSG00000067700	Gm5862	5.55e-17	0	1.97808	0.937026	2.00075	0.7089	0.200008	0.199932	1.39479	0.508612
j'	ENSMUSG00000071317	Bves	93.3112	11.3665	132.057	15.4122	119.822	10.8061	95.7617	10.0112	115.16	14.646
j'	ENSMUSG00000073079	Srp54	97.6721	4.1618	179.29	18.4943	187.27	18.0207	130.821	8.26482	155.131	13.5875
j'	ENSMUSG00000073929	Trim30e-ps1	5.55e-17	0	2.1698	1.0077	2.19206	1.27497	5.55e-17	0	3.38485	0.981088
j'	ENSMUSG00000074575	Kcng1	1402.34	147.46	1975.85	199.945	1785.73	70.7419	1589.64	115.194	1627.11	100.934
j'	ENSMUSG00000074971	Fibin	84.6362	9.98609	176.862	21.3834	138.816	9.56451	126.753	9.99138	151.343	17.7576
j'	ENSMUSG00000075270	Pde11a	435.445	59.4195	693.843	107.782	682.482	48.1021	528.748	33.3404	615.915	40.4953
j'	ENSMUSG00000077316	n-R5s171	0.202157	0.202067	4.36402	1.32252	3.39607	1.16567	1.1961	0.796224	5.97616	1.45856
j'	ENSMUSG00000080773	Gm12955	1.19146	0.485557	6.93595	2.81869	2.98966	0.623205	1.99527	0.627738	3.18211	1.7345
j'	ENSMUSG00000082988	Gm5903	77.686	9.16111	113.549	15.0322	85.6186	1.98493	81.0039	7.77212	89.7638	10.325
j'	ENSMUSG00000085896	5330429C05Rik	7.37168	2.56387	19.9995	5.80337	14.1867	4.60754	7.1745	1.75835	15.6958	4.08055
j'	ENSMUSG00000086326	Gm13200	6.18288	2.67924	13.6306	2.48172	9.98044	1.05842	4.98815	1.80651	12.1337	1.53678
j'	ENSMUSG00000087651	1500009L16Rik	587.815	22.7869	667.637	13.7715	600.432	10.6636	587.997	25.1197	630.676	31.6569
j'	ENSMUSG00000088832	Gm23543	5.55e-17	0	1.39843	0.871339	1.00253	0.778087	5.55e-17	0	0.200404	0.200404
j'	ENSMUSG00000090121	Abhd12b	30.3012	8.06205	86.4763	15.8002	111.363	22.6186	35.4837	15.753	85.809	32.1698
j'	ENSMUSG00000090213	Tmem189	1219.77	32.6989	1328.07	37.7492	1289.53	33.1537	1194.08	43.9269	1266.19	19.6999
j'	ENSMUSG00000091514	Gm17484	35.8224	4.80268	58.9161	4.93514	59.863	6.41342	40.6643	4.6981	54.542	2.60497
j'	ENSMUSG00000091636	Akain1	544.911	30.9702	757.684	34.4761	728.061	33.7849	658.642	20.6159	753.973	30.5442
j'	ENSMUSG00000092622	Khdc3	4.20201	1.69586	15.0178	2.91171	11.1773	1.94124	5.58539	1.17133	19.7041	3.99079
j'	ENSMUSG00000095615	Gm26243	5.55e-17	0	2.18194	1.41255	0.997219	0.629133	5.55e-17	0	0.800212	0.490029
j'	ENSMUSG00000096869	Gm6676	5.55e-17	0	3.95534	0.943247	3.18576	1.05444	1.19847	0.373692	4.37729	0.922665
j'	ENSMUSG00000097929	Tunar	732.992	32.0143	1002.83	72.954	972.54	33.7878	851.741	62.4809	997.02	44.6441
j'	ENSMUSG00000101693	Gm19461	62.1029	7.17652	92.7282	10.6505	99.8483	17.7136	61.1897	9.13067	91.9169	7.66624
j'	ENSMUSG00000101778	Gm29488	5.55e-17	0	1.97573	0.885023	0.79999	0.489586	5.55e-17	0	0.398062	0.397988
j'	ENSMUSG00000103717	Gm38038	5.55e-17	0	2.17636	1.26281	0.80057	0.490036	5.55e-17	0	0.601011	0.601011
j'	ENSMUSG00000104125	Gm37488	5.55e-17	0	3.18508	2.05524	2.7965	1.19613	5.55e-17	0	1.59251	0.746349
k'	ENSMUSG00000005397	Nid1	225.857	8.49351	522.225	14.4615	446.169	19.8025	460.316	28.789	453.023	24.2477
k'	ENSMUSG00000062488	Ifit3b	100.016	7.99546	283.03	25.9299	194.346	13.1929	234.639	29.8836	206.04	31.1845
k'	ENSMUSG00000072620	Slfn2	51.0938	10.409	202.63	12.4856	121.302	20.2521	153.325	8.26904	131.403	19.6582
k'	ENSMUSG00000037095	Lrg1	92.8944	11.2274	446.821	26.9677	225.122	38.8011	298.007	61.202	228.363	53.0985
k'	ENSMUSG00000075602	Ly6a	245.162	28.9912	1126.69	45.7272	617.912	140.292	807.885	198.03	669.894	165.458
k'	ENSMUSG00000064215	Ifi27	1115.31	70.5689	1913.56	128.786	1574.3	130.767	1646.48	53.1698	1539.88	150.366
k'	ENSMUSG00000036560	Lgi4	596.602	16.8932	810.398	23.9185	685.633	35.8282	729.927	31.1475	682.014	17.7421
k'	ENSMUSG00000060591	Ifitm2	356.014	19.0142	588.127	30.6811	446.572	26.502	539.851	45.7509	489.52	39.2392
k'	ENSMUSG00000003541	Ier3	260.799	29.1797	442.951	38.5087	356.386	16.5031	401.506	32.111	357.026	23.2498
k'	ENSMUSG00000033685	Ucp2	1503.55	93.0378	2422.83	164.615	1942.69	157.269	2076.64	144.444	1891.23	165.288
k'	ENSMUSG00000048572	Tmem252	83.0356	9.85404	244.861	45.8184	155.527	9.6388	183.21	44.2708	144.167	19.7662
k'	ENSMUSG00000050105	Grrp1	97.5747	9.85729	198.172	17.523	140.014	9.09711	150.434	26.2711	140.963	24.06
k'	ENSMUSG00000022893	Adamts1	770.72	42.7172	1099.09	67.3346	927.682	20.9092	948.403	68.0855	939.711	69.5228
k'	ENSMUSG00000020717	Pecam1	894.617	55.4763	1315.46	37.8937	1100.44	60.749	1151.55	115.824	1055.76	100.149
k'	ENSMUSG00000038007	Acer2	526.263	53.7307	935.096	126.432	575.981	31.483	793.179	107.24	469.181	53.1036
k'	ENSMUSG00000030341	Tnfrsf1a	477.306	16.2079	672.052	23.605	545.733	27.6263	633.556	43.0295	561.843	41.6354
k'	ENSMUSG00000025647	Shisa5	2034.1	64.1948	2509.98	90.9832	2183.28	67.5288	2507.83	39.7225	2267.74	72.2016
k'	ENSMUSG00000040296	Ddx58	222.393	5.00711	331.881	23.8239	260.781	6.20114	296.624	13.5932	260.437	22.6287
k'	ENSMUSG00000031502	Col4a1	2856.04	161.364	3709.28	129.32	3259.25	126.802	3289.42	237.593	2865.74	158.684
k'	ENSMUSG00000031875	Cmtm3	308.464	18.8284	425.298	20.2282	336.919	11.5125	390.017	20.66	356.777	26.028
k'	ENSMUSG00000032383	Ppib	1093.03	19.266	1271.86	30.7048	1129.95	26.3131	1231.43	31.5488	1165.23	39.8516
k'	ENSMUSG00000027901	Dennd2d	19.5111	2.96429	42.9162	6.33696	22.1534	4.30086	27.291	5.28421	23.4926	4.48758
k'	ENSMUSG00000021322	Aoah	2.39721	1.60275	12.6484	1.7308	3.99409	1.10275	6.77994	1.49122	3.58032	1.31728
k'	ENSMUSG00000006369	Fbln1	427.137	27.3207	583.636	28.4884	461.862	36.3592	506.37	35.5347	456.726	26.5251
k'	ENSMUSG00000024677	Ms4a6b	53.3396	3.34688	106.367	5.80744	60.0171	10.1853	66.1568	10.5074	55.475	12.0446
k'	ENSMUSG00000026547	Tagln2	562.224	25.3121	745.492	42.8301	608.066	47.8149	672.042	43.3662	556.689	61.1112
k'	ENSMUSG00000020432	Tcn2	836.75	25.8785	987.163	25.2214	859.274	47.7372	949.683	29.8328	816.891	24.4213
k'	ENSMUSG00000042228	Lyn	461.341	42.504	576.222	29.9601	459.759	16.0196	490.869	23.0453	481.209	43.7185
k'	ENSMUSG00000027082	Tfpi	171.675	15.3612	237.182	11.9881	158.546	9.72474	191.436	21.8937	173.089	9.06636
k'	ENSMUSG00000068587	Mgam	5.55e-17	0	2.3751	0.741159	5.55e-17	0	0.397775	0.397624	5.55e-17	0
k'	ENSMUSG00000097805	Gm17473	2.81059	1.20837	11.4762	3.49411	2.59	0.975185	4.38802	1.59943	3.18101	0.790393
k'	ENSMUSG00000040055	Gjb6	2462.69	115.157	2908.5	159.169	2494.9	131.255	2592.11	114.52	2474.43	151.741
k'	ENSMUSG00000020407	Upp1	89.0872	11.8748	128.545	13.6899	92.5303	10.7359	102.262	7.01222	92.2679	10.4679
k'	ENSMUSG00000026399	Cd55	209.52	4.22624	252.978	9.84603	203.242	8.94459	245.606	6.89713	205.965	16.3302
k'	ENSMUSG00000014361	Mertk	1410.13	79.5704	1633.94	105.882	1298.01	84.3187	1448.67	42.996	1348.62	61.2486
k'	ENSMUSG00000030088	Aldh1l1	2141.53	77.8107	2359.93	55.7933	2128.53	48.5078	2263.15	54.4739	2086.8	115.653
k'	ENSMUSG00000089824	Rbm12	488.163	22.8853	559.559	26.7354	469.328	25.71	506.348	19.1573	487.723	22.231
k'	ENSMUSG00000024778	Fas	68.4228	5.62664	98.0402	9.63025	55.0261	6.7647	86.3208	15.0209	51.7077	6.55244
k'	ENSMUSG00000015656	Hspa8	29349.3	511.473	31488.7	573.741	29077.5	524.226	29748.3	474.1	29184.8	1237.65
l'	ENSMUSG00000029561	Oasl2	81.694	11.7929	332.723	29.6354	231.26	11.6557	242.367	35.3876	226.821	32.8935
l'	ENSMUSG00000053835	H2-T24	122.385	15.4653	346.681	22.538	263.61	13.9673	265.441	17.537	264.552	24.4953
l'	ENSMUSG00000037686	Aspg	192.73	11.4069	350.053	12.4551	266.581	11.1824	251.903	25.7307	219.242	12.2452
l'	ENSMUSG00000025608	Podxl	1690.72	55.5774	2584.86	42.3786	1901.69	116.253	2236.17	177.08	1917.25	134.745
l'	ENSMUSG00000037820	Tgm2	632.231	60.5535	1170.34	81.6272	878.836	68.5099	936.686	121.276	816.954	93.4392
l'	ENSMUSG00000022146	Osmr	132.004	15.0179	268.301	16.6072	194.895	10.1934	207.815	30.2452	173.712	3.56624
l'	ENSMUSG00000031805	Jak3	519.416	39.0778	792.823	10.6079	656.826	17.8227	673.327	56.6238	611.679	28.7145
l'	ENSMUSG00000042286	Stab1	585.721	33.6623	873.459	52.363	730.793	32.3917	721.131	39.2922	692.085	39.7162
l'	ENSMUSG00000020806	Rhbdf2	59.7465	3.61041	114.251	5.80099	69.2326	7.86298	84.3127	8.20167	68.0724	4.24284
l'	ENSMUSG00000030218	Mgp	389.403	29.4733	786.594	69.9091	547.477	54.9657	589.193	41.2804	571.228	70.6889
l'	ENSMUSG00000034028	Cd226	2.78084	0.472712	16.7931	2.27507	5.78344	1.10969	5.98925	1.2754	6.96624	1.29971
l'	ENSMUSG00000051439	Cd14	170.666	19.3018	356.488	28.1931	247.082	21.8404	262.85	27.1632	223.506	25.5563
l'	ENSMUSG00000044562	Rasip1	530.247	20.28	696.974	27.8897	618.893	28.6451	611.534	24.7788	591.531	18.5003
l'	ENSMUSG00000027333	Smox	2254.89	94.23	3056.01	161.463	2558.95	107.731	2557.44	123.763	2588	191.24
l'	ENSMUSG00000030790	Adm	67.4088	4.82136	132.521	11.9098	89.2354	9.85997	95.8084	12.4579	84.6554	11.5496
l'	ENSMUSG00000029810	Tmem176b	1296.18	72.552	1833.79	80.9311	1509.61	102.062	1547.27	78.1932	1511.48	107.695
l'	ENSMUSG00000057286	St6galnac2	163.817	14.853	300.021	20.3512	192.946	20.4977	219.797	22.8008	180.279	24.6388
l'	ENSMUSG00000030748	Il4ra	302.503	39.3958	581.476	38.8152	352.464	42.4977	408.619	81.0142	367.539	57.5276
l'	ENSMUSG00000023067	Cdkn1a	540.195	93.0366	958.098	116.744	648.954	58.756	707.063	74.2859	671.775	142.465
l'	ENSMUSG00000063268	Parp10	147.098	8.59019	211.762	15.5516	157.517	10.198	168.083	5.83927	154.347	13.5163
l'	ENSMUSG00000056888	Glipr1	25.0724	3.30182	50.931	7.62147	32.3457	3.14656	34.2789	4.54718	33.6384	3.17392
l'	ENSMUSG00000006205	Htra1	6491.84	208.455	7807.55	272.935	6773.65	232.607	6748.44	313.389	6786	302.272
l'	ENSMUSG00000009687	Fxyd5	372.937	26.1313	532.422	19.6629	414.198	10.5135	432.559	49.2358	362.051	35.5328
l'	ENSMUSG00000039234	Sec24d	1138.64	74.5652	1451.79	109.823	1251.86	32.6241	1202.98	53.2969	1251.01	33.4763
l'	ENSMUSG00000020120	Plek	747.72	43.1728	917.725	19.0947	765.939	31.1906	792.804	38.677	782.429	42.4971
l'	ENSMUSG00000038671	Arfrp1	1057.33	31.8128	1214.1	37.1709	1079.78	32.69	1111.84	13.4038	1091.23	31.206
l'	ENSMUSG00000027641	Rbl1	126.219	11.7591	181.231	10.4446	134.672	7.50705	135.98	9.47617	140.763	17.5015
l'	ENSMUSG00000024737	Slc15a3	125.406	12.2577	178.012	13.0948	134.205	13.2909	132.544	21.4207	127.132	8.84735
l'	ENSMUSG00000035845	Alg12	425.226	17.0424	506.336	6.64278	433.625	17.6867	424.243	17.8524	432.313	19.2443
l'	ENSMUSG00000085980	Gm12408	10.3268	2.42337	22.5068	5.04852	11.752	2.92549	10.7674	1.85111	11.7412	2.71154
l'	ENSMUSG00000026921	Egfl7	878.71	17.1449	1012.61	19.4376	860.731	37.3805	858.196	47.5349	832.168	57.7304
l'	ENSMUSG00000039194	Rlbp1	472.903	25.2353	552.654	21.8732	466.631	22.2912	456.508	18.8469	470.751	35.7515
l'	ENSMUSG00000097301	AW121686	54.3465	7.65667	74.3486	8.40766	50.8937	2.37654	45.8653	4.75463	51.9398	2.72504
l'	ENSMUSG00000037656	Slc20a2	2806.94	49.1597	3082.1	113.053	2808.85	83.8061	2780.93	84.5056	2766.6	63.1405
m'	ENSMUSG00000002384	Bmp8b	4.38108	0.811659	10.3325	3.25047	9.5609	2.67423	4.38349	0.737933	4.77365	1.0144
m'	ENSMUSG00000002870	Mcm2	381.715	23.7118	488.421	28.2559	415.479	19.3037	373.377	29.6365	364.742	53.4823
m'	ENSMUSG00000003283	Hck	160.225	23.3474	282.421	16.0795	201.697	17.7665	188.494	14.3334	200.291	35.8559
m'	ENSMUSG00000017405	Nek8	134.08	6.42391	168.638	8.58221	149.282	7.45332	126.801	5.79661	133.379	15.4224
m'	ENSMUSG00000020019	Ntn4	575.157	32.7497	655.018	40.7082	591.568	21.9195	568.236	13.5842	569.732	17.3501
m'	ENSMUSG00000022678	Nde1	1069.77	20.7619	1218.35	58.4999	1135.18	61.811	1061.77	24.0216	1033.7	46.794
m'	ENSMUSG00000024349	Tmem173	242.259	19.0347	317.99	12.5541	264.524	18.3878	254.379	31.2205	243.889	13.9946
m'	ENSMUSG00000024867	Pip5k1b	1737.86	138.928	2187.53	138.781	2095.17	49.395	1923.14	55.6707	1900.31	86.0104
m'	ENSMUSG00000026072	Il1r1	414.385	30.0164	563.869	47.1912	480.963	36.5335	438.428	55.3657	429.809	33.0925
m'	ENSMUSG00000026173	Plcd4	587.283	16.1395	687.171	37.1349	661.83	46.563	571.736	21.5503	600.425	7.02787
m'	ENSMUSG00000027748	Trpc4	1687.21	127.044	2109.5	188.206	1900.09	45.6136	1783.13	95.3269	1758.56	87.5132
m'	ENSMUSG00000030022	Adamts9	339.261	22.6169	541.721	59.8114	456.534	36.7408	430.815	43.3447	424.441	39.9669
m'	ENSMUSG00000030350	Prmt8	2837.7	81.5405	3153.42	69.9776	3039.91	37.1889	2861.38	74.9906	2860.5	87.2604
m'	ENSMUSG00000030352	Tspan9	2231.64	77.2989	2737.14	54.2648	2549.45	125.987	2333.94	57.0889	2372.54	139.982
m'	ENSMUSG00000031207	Msn	1304.57	58.9917	1800.64	79.0437	1589.03	78.9208	1581.42	93.6429	1541.54	117.762
m'	ENSMUSG00000031538	Plat	1614.07	71.3947	2017.01	90.9962	1856.42	45.2772	1740.43	77.28	1720.98	65.5415
m'	ENSMUSG00000032431	Crtap	238.397	6.2351	290.481	4.48042	255.64	8.62985	243.59	8.03089	244.392	21.6761
m'	ENSMUSG00000032690	Oas2	3.9675	1.3638	62.0486	7.85265	42.116	3.61388	40.8474	4.87304	36.0142	4.7554
m'	ENSMUSG00000033170	Card10	677.081	29.9433	1060.17	82.3589	976.268	45.0525	913.071	28.4545	860.339	53.068
m'	ENSMUSG00000034853	Acot11	1595.09	71.7565	1954.92	126.205	1802.43	89.5732	1731.62	98.413	1589.78	83.1652
m'	ENSMUSG00000035673	Sbno2	847.683	21.4448	995.625	41.7993	916.702	55.3634	849.838	49.6869	844.798	25.8546
m'	ENSMUSG00000035878	Hykk	149.946	13.0573	203.326	9.59844	171.533	12.1039	166.342	9.29835	166.219	7.41993
m'	ENSMUSG00000038736	Nudcd1	528.244	17.8861	798.377	25.7414	733.905	22.3267	702.698	17.4172	715.328	22.8881
m'	ENSMUSG00000038781	Stap2	66.1831	6.99872	110.096	4.71837	91.7057	12.1771	79.1348	7.02854	82.7885	8.42301
m'	ENSMUSG00000040618	Pck2	1536.81	72.0191	1743.6	76.8922	1551.39	65.7113	1530.59	29.5392	1505.48	87.9472
m'	ENSMUSG00000052384	Nrros	312.922	29.4186	378.716	17.7253	321.794	18.7605	307.434	22.1794	298.587	14.1116
m'	ENSMUSG00000066538	Gm6254	73.4482	6.8774	93.7337	1.28651	86.7677	8.38059	72.3811	5.89924	72.8315	4.48098
m'	ENSMUSG00000073599	Ecscr	72.8399	1.21462	148.531	8.14856	111.512	8.47611	101.375	16.5683	104.726	23.3819
m'	ENSMUSG00000092187	Gm20457	71.2516	4.61957	94.892	4.50355	73.82	3.33906	71.3866	5.63514	68.8461	1.97558
m'	ENSMUSG00000097152	Gm26515	2.79938	0.805241	8.09648	1.16406	3.60093	1.2997	3.39187	1.07775	1.59148	0.397901
m'	ENSMUSG00000098238	Gm8756	9.32142	2.1856	16.2057	2.40858	9.9796	0.904758	8.97919	1.65601	9.151	1.57943
m'	ENSMUSG00000102880	4930517J16Rik	2.78744	0.492403	55.5898	4.467	48.8884	5.68834	36.2655	3.67414	38.8156	3.52976
n'	ENSMUSG00000000275	Trim25	278.54	16.3681	412.791	28.0891	357.013	18.2003	380.017	30.0786	331.264	27.3397
n'	ENSMUSG00000001247	Lsr	147.695	7.01157	235.801	10.5846	191.276	8.02283	196.938	21.3947	178.419	14.9952
n'	ENSMUSG00000001473	Tubb6	106.802	16.3743	159.374	12.7887	125.432	15.6649	138.156	11.5663	116.407	2.24445
n'	ENSMUSG00000001930	Vwf	1175.39	89.2011	2632.21	111.47	2233.5	138.543	2450.26	198.984	2011.71	226.093
n'	ENSMUSG00000002325	Irf9	417.029	18.146	666.286	45.2406	594.598	31.131	570.242	40.974	548.009	45.9881
n'	ENSMUSG00000002763	Pex6	2955.91	124.355	3253.9	79.0614	2991.78	94.2748	2997.8	44.4912	2943.46	165.05
n'	ENSMUSG00000003123	Lipe	457.993	33.26	539.844	22.1372	504.514	14.4975	496.08	13.4614	429.181	31.7512
n'	ENSMUSG00000003779	Kif20a	53.9753	3.27781	81.3189	11.5149	75.4933	10.284	71.5537	4.71771	57.6843	4.81127
n'	ENSMUSG00000005410	Mcm5	381.676	38.6578	527.777	29.8642	467.965	37.0485	433.017	32.8722	390.214	49.8319
n'	ENSMUSG00000006445	Epha2	57.7385	7.04343	94.058	5.93515	91.4655	6.74473	81.3927	6.84509	69.834	4.59363
n'	ENSMUSG00000010358	Ifi35	97.239	6.06457	162.496	8.57532	123.091	4.05908	138.524	8.61434	117.198	5.6315
n'	ENSMUSG00000010554	Mettl16	1526.98	74.0802	1726.51	59.0399	1649.76	43.1483	1614.23	52.6695	1555.37	42.7334
n'	ENSMUSG00000012519	Mlkl	6.57591	1.48273	22.9882	4.68055	19.1607	3.74145	14.7335	4.02487	10.3441	1.44658
n'	ENSMUSG00000015468	Notch4	352.243	29.2172	574.542	23.6527	565.027	22.9847	570.391	33.8774	486.634	28.4082
n'	ENSMUSG00000015647	Lama5	694.929	20.2411	819.576	19.3449	844.228	31.8396	764.377	45.627	699.235	20.1473
n'	ENSMUSG00000016487	Ppfibp1	1232.5	33.6811	1395.39	33.1533	1332.27	46.8857	1343.72	48.3899	1254.02	18.6535
n'	ENSMUSG00000016995	Matn4	603.96	12.9095	851.698	30.2531	820.214	49.0508	811.083	37.146	752.457	35.1056
n'	ENSMUSG00000017756	Slc12a7	248.719	12.8917	321.361	6.30329	270.078	9.00791	273.391	16.9866	256.516	25.1311
n'	ENSMUSG00000017830	Dhx58	42.2316	2.50425	78.0633	5.84582	80.4287	3.56415	72.1367	6.92172	57.689	7.63687
n'	ENSMUSG00000018008	Cyth4	810.155	86.9567	1074.15	26.1771	912.192	26.9727	929.192	67.1701	879.144	70.2627
n'	ENSMUSG00000018986	Slfn3	18.1008	1.74634	38.9395	4.53547	27.1033	6.26489	25.1328	5.56066	19.8883	2.62783
n'	ENSMUSG00000019066	Rab3d	651.628	43.8551	775.862	35.7786	725.025	19.7145	731.479	22.1274	670.129	14.7796
n'	ENSMUSG00000020388	Pdlim4	428.187	26.0054	492.286	9.09974	456.346	16.6804	471.276	15.937	426.389	13.867
n'	ENSMUSG00000020400	Tnip1	1351.51	27.7423	1526.64	40.5919	1511.83	49.5263	1481.61	31.4631	1375.92	37.943
n'	ENSMUSG00000020907	Rcvrn	12.1332	4.43163	21.7528	2.0047	18.1439	2.28268	16.953	1.3198	9.96123	2.60973
n'	ENSMUSG00000022587	Ly6e	5761.32	182.827	6909.18	227.134	6307.65	228.737	6957.53	197.372	6178.76	363.7
n'	ENSMUSG00000023019	Gpd1	3649.38	138.799	4284.58	148.444	4329.62	165.124	4053.07	122.012	3910.25	78.8967
n'	ENSMUSG00000024066	Xdh	301.54	24.0604	672.764	42.6455	539.179	37.7456	548.645	63.5835	481.854	89.0501
n'	ENSMUSG00000024165	Jpt2	226.612	5.67613	321.663	13.7967	295.275	13.8961	286.955	4.73183	263.053	27.088
n'	ENSMUSG00000024301	Kifc5b	114.591	10.2038	161.944	7.78371	137.935	4.65478	137.341	4.48957	129.921	6.5496
n'	ENSMUSG00000024319	Vps52	4139.11	59.3224	4755.97	72.8987	4760.81	74.7734	4655.76	73.4098	4433.54	109.907
n'	ENSMUSG00000024401	Tnf	10.7456	2.9008	28.4692	9.25233	13.1794	3.33682	13.15	4.47195	10.5347	3.26077
n'	ENSMUSG00000024521	Pmaip1	203.071	6.76598	275.925	21.9984	242.948	21.5207	239.952	21.9936	218.447	22.4224
n'	ENSMUSG00000024663	Rab3il1	526.03	31.95	657.118	19.0485	589.236	13.1914	588.472	21.8794	521.145	48.0145
n'	ENSMUSG00000024833	Pola2	251.07	4.9108	301.957	10.7973	285.291	12.2026	276.245	10.7365	258.434	10.8935
n'	ENSMUSG00000024900	Cpt1a	1257.73	39.2931	1384.76	47.453	1320.12	26.4399	1352.1	25.773	1229.17	42.6524
n'	ENSMUSG00000025017	Pik3ap1	142.722	27.0422	250.344	19.2486	203.071	9.27393	207.851	18.2764	178.711	27.0953
n'	ENSMUSG00000025355	Mmp19	28.2382	4.35377	52.7648	6.01046	44.0907	2.72337	41.2704	2.57421	36.5865	6.31794
n'	ENSMUSG00000025488	Cox8b	25.6832	3.26026	60.3112	6.16984	30.6757	9.134	52.8929	11.558	26.8417	9.19323
n'	ENSMUSG00000025491	Ifitm1	81.6113	11.9693	153.437	18.2797	111.422	13.6573	137.699	21.3122	109.171	13.5825
n'	ENSMUSG00000025492	Ifitm3	517.231	60.8897	871.406	63.7938	632.191	76.0324	637.498	72.9781	578.655	96.7069
n'	ENSMUSG00000026029	Casp8	126.658	10.1111	167.734	10.4286	135.51	5.21267	148.498	7.34718	129.251	17.7477
n'	ENSMUSG00000026117	Zap70	176.173	12.7951	261.107	22.0297	255.107	14.9762	220.067	8.49839	203.008	23.1543
n'	ENSMUSG00000026222	Sp100	111.637	3.60557	221.734	17.5889	192.65	13.6863	182.753	12.8885	164.133	12.4034
n'	ENSMUSG00000027293	Ehd4	610.126	36.4145	799.014	21.2545	757.155	32.9221	747.572	22.0589	700.015	14.5792
n'	ENSMUSG00000027318	Adam33	41.4967	8.17688	68.6334	6.05486	56.3463	10.5406	51.4079	5.95272	35.8304	4.71152
n'	ENSMUSG00000027412	Lpin3	40.9431	4.63959	59.6578	5.06776	53.653	6.1338	58.6112	5.9319	38.1865	6.33243
n'	ENSMUSG00000027875	Hmgcs2	468.29	69.3947	930.297	82.3024	734.886	115.722	792.652	72.6336	627.104	107.754
n'	ENSMUSG00000028037	Ifi44	7.97067	1.67371	80.0754	9.19764	57.4533	3.55036	69.7465	5.63369	46.5282	7.68599
n'	ENSMUSG00000028800	Hdac1	1012.11	37.9151	1200.52	46.9942	1085.11	33.9649	1087.78	37.7735	1000.17	43.7143
n'	ENSMUSG00000028862	Map3k6	82.2076	7.40097	149.843	20.8027	114.432	10.1631	112.439	2.28622	102.518	26.5979
n'	ENSMUSG00000029622	Arpc1b	987.774	106.103	1382.56	46.8626	1195.41	50.6868	1171.22	61.6455	1106.29	117.367
n'	ENSMUSG00000029816	Gpnmb	67.5336	7.44327	109.041	16.1613	103.474	10.4824	114.229	8.38955	78.544	9.666
n'	ENSMUSG00000029826	Zc3hav1	265.651	5.3895	367.959	14.0961	332.924	10.9174	332.967	17.5904	306.892	22.7879
n'	ENSMUSG00000030796	Tead2	114.151	11.3173	148.878	8.81861	142.421	8.84137	136.059	9.03598	114.823	4.85957
n'	ENSMUSG00000031503	Col4a2	3284.87	230.026	3795.62	165.379	3747.7	289.959	3483.81	198.057	3195.37	132.794
n'	ENSMUSG00000031700	Gpt2	2619.82	75.0029	3077.11	188.437	2994.92	81.093	2837.74	93.9613	2723.04	131.154
n'	ENSMUSG00000031753	Cog4	2114.42	47.9975	2370.11	54.088	2293.89	26.0642	2268.09	51.7199	2178.79	42.0077
n'	ENSMUSG00000031901	Dus2	471.737	10.4767	527.249	12.5649	483.67	15.2376	481.53	13.4468	454.462	10.1847
n'	ENSMUSG00000032440	Tgfbr2	1085.11	35.7084	1336.23	34.4409	1235.17	59.6164	1259.92	53.2698	1142.88	80.32
n'	ENSMUSG00000032596	Uba7	132.614	8.1171	171.049	13.0657	156.056	9.34558	149.835	14.968	133.659	12.3344
n'	ENSMUSG00000032818	Loxhd1	8.32954	3.07854	19.7723	4.26665	10.6085	2.9737	9.966	2.27255	8.56669	1.66836
n'	ENSMUSG00000033355	Rtp4	57.723	5.37835	187.589	14.3333	138.45	15.8639	144.913	14.3975	130.434	19.3242
n'	ENSMUSG00000033628	Pik3c3	2606.08	28.5002	2852.6	52.6014	2770.33	43.1919	2676.33	56.4451	2635.77	81.7008
n'	ENSMUSG00000034165	Ccnd3	952.479	34.397	1069.21	43.1013	1039.78	32.0653	1007.3	13.4778	932.934	22.7889
n'	ENSMUSG00000034459	Ifit1	81.4791	16.6876	289.159	23.8687	219.704	9.07007	218.27	27.2971	186.326	24.1072
n'	ENSMUSG00000034617	Mtrr	762.412	38.1186	870.406	32.9526	837.019	8.15667	814.531	57.3995	767.505	18.1754
n'	ENSMUSG00000035237	Lcat	830.873	47.6752	1061.76	22.5829	1004.22	49.7126	986.113	19.9056	921.427	58.5076
n'	ENSMUSG00000035342	Lzts2	2054.46	37.4916	2296.12	113.225	2228.11	45.7205	2159.4	41.053	2092.67	57.4094
n'	ENSMUSG00000035493	Tgfbi	205.586	20.089	306.771	21.8615	254.115	16.6589	257.784	15.0534	233.726	24.4397
n'	ENSMUSG00000035929	H2-Q4	100.48	15.7831	315.639	34.6838	217.234	23.6715	246.277	42.5106	205.496	35.8535
n'	ENSMUSG00000036256	Igfbp7	1407.4	177.311	2172.91	106.924	1731.31	111.557	1938.68	191.678	1615.56	242.757
n'	ENSMUSG00000036565	Ttyh3	11314.2	157.141	12427.2	128.368	11891.8	352.115	12230.8	183.709	11408.7	228.35
n'	ENSMUSG00000036743	Psma8	13.1034	3.01487	26.8297	7.66555	15.7466	3.43176	18.532	2.8685	13.9385	2.09825
n'	ENSMUSG00000036814	Slc6a20a	353.463	37.2168	500.051	44.6714	414.381	29.0622	444.014	43.6749	382.193	31.3154
n'	ENSMUSG00000037003	Tns2	873.288	48.454	1034.23	42.5001	950.043	44.3154	990.189	34.4798	921.667	15.5211
n'	ENSMUSG00000037321	Tap1	158.243	11.7454	238.206	10.3439	206.233	15.443	213.279	19.5146	185.415	9.06179
n'	ENSMUSG00000039911	Spsb1	828.422	36.3239	1008.91	39.0058	937.694	34.5788	990.701	69.7597	878.144	20.4156
n'	ENSMUSG00000041577	Prelp	808.579	68.6216	1160.08	105.887	1014.62	95.3982	1119.32	54.6197	935.591	81.7408
n'	ENSMUSG00000041907	Gpr45	660.387	33.9286	752.803	22.8811	697.263	15.4831	680.155	26.2054	621.336	25.748
n'	ENSMUSG00000042289	Hsd3b7	362.384	14.3419	482.27	16.9548	427.361	14.0748	461.987	4.3867	393.36	16.4714
n'	ENSMUSG00000042607	Asb4	30.0084	8.09677	53.5849	2.96804	38.4556	6.11525	48.5953	10.2492	29.4221	7.28252
n'	ENSMUSG00000043099	Hic1	140.819	8.87652	224.493	17.9547	207.261	12.649	206.913	9.22521	181.318	2.51181
n'	ENSMUSG00000046223	Plaur	28.5045	3.83626	50.0361	2.83674	38.5077	3.46556	37.0581	6.38696	26.8658	2.75348
n'	ENSMUSG00000046352	Gjb2	325.517	43.3681	449.598	43.9005	355.854	18.6874	382.682	19.1076	315.433	15.0935
n'	ENSMUSG00000046541	Zfp526	459.346	19.1155	530.534	17.5127	548.553	20.1045	511.442	4.37039	470.687	7.07534
n'	ENSMUSG00000047731	Wbp1l	1865.34	47.938	2067.86	42.0358	2075.57	38.0592	1941.9	64.0103	1896.42	43.0167
n'	ENSMUSG00000049130	C5ar1	24.0614	6.90209	64.8162	9.03355	39.9084	7.72295	44.0287	8.80958	37.3938	5.56581
n'	ENSMUSG00000050212	Eva1b	83.1179	6.44882	110.084	5.44743	102.949	5.96684	87.975	4.80197	83.9551	3.52555
n'	ENSMUSG00000050737	Ptges	188.4	13.2847	249.953	10.9921	223.474	17.1161	235.156	19.3147	199.606	2.61924
n'	ENSMUSG00000053175	Bcl3	30.669	5.18249	73.5046	8.01839	51.1118	5.61615	53.3989	10.8994	42.9781	5.02364
n'	ENSMUSG00000055972	2810407A14Rik	30.9767	5.61445	50.5985	3.64156	45.2505	6.97324	40.0676	1.96913	29.6559	1.31361
n'	ENSMUSG00000056144	Trim34a	24.2806	1.82692	71.5397	5.08752	54.2971	5.1874	53.4138	5.93145	51.1148	6.77969
n'	ENSMUSG00000057342	Sphk2	1362.51	30.5045	1522.35	37.0137	1398.41	38.6989	1430.06	68.6277	1384.42	44.534
n'	ENSMUSG00000058441	Panx2	6974.18	147.242	8017.77	215.639	7950.51	148.72	7527.11	145.768	7360.73	191.723
n'	ENSMUSG00000059555	Tor4a	160.144	12.1695	218.531	15.5744	179.326	9.55764	189.415	7.54033	172.263	14.6151
n'	ENSMUSG00000063234	Gpr84	72.585	18.8061	192.041	15.1917	136.403	25.4453	131.304	25.6866	118.91	15.3908
n'	ENSMUSG00000063628	Gm7665	28.2838	2.64132	46.0917	4.82422	40.5062	7.42927	32.1217	5.43903	29.4422	5.27001
n'	ENSMUSG00000066687	Zbtb16	2606.2	255.876	3369.26	232.722	3150.89	55.5053	3082.34	111.069	2874.8	173.703
n'	ENSMUSG00000070327	Rnf213	537.229	33.1427	875.678	37.4866	770.55	30.3509	762.943	58.61	706.082	51.8536
n'	ENSMUSG00000071176	Arhgef10	2530.22	148.865	2933.97	176.33	2860.92	133.556	2727.78	78.7391	2559.92	117.711
n'	ENSMUSG00000071713	Csf2rb	136.869	32.37	227.199	13.3167	153.695	13.2298	160.957	21.2249	123.45	24.1854
n'	ENSMUSG00000071714	Csf2rb2	83.1286	14.6053	145.216	11.4949	101.896	11.2983	110.362	11.943	88.4892	15.9118
n'	ENSMUSG00000072941	Sod3	477.927	17.2524	615.738	36.1823	561.134	50.2813	654.218	23.8412	517.067	23.9634
n'	ENSMUSG00000074151	Nlrc5	37.6542	3.68164	64.8317	9.29586	50.669	5.32334	56.6022	7.33364	37.7919	3.48812
n'	ENSMUSG00000074156	Ces1h	5.55e-17	0	2.37902	0.971311	0.79509	0.794434	2.39737	1.168	5.55e-17	0
n'	ENSMUSG00000074793	Hspa12b	437.154	36.5194	551.567	11.8761	500.666	29.6852	488.142	23.3954	454.176	42.2811
n'	ENSMUSG00000078606	Gm4070	22.9071	2.50102	37.9744	4.26879	42.6532	6.09786	39.0376	6.4689	23.6947	4.23179
n'	ENSMUSG00000078864	Gm14322	12.6987	2.74044	243.514	11.4815	225.245	24.2009	265.854	20.0741	165.661	10.7401
n'	ENSMUSG00000079550	Mpp4	33.0338	5.50736	52.294	8.35242	37.7292	6.6808	42.471	1.35686	28.8548	4.64239
n'	ENSMUSG00000084899	Gm15344	19.2965	3.69005	40.5517	1.72615	29.7935	6.57258	31.5403	5.71506	26.2635	2.0786
n'	ENSMUSG00000085563	2210411M09Rik	5.00064	1.80739	13.6214	3.92861	10.376	1.02855	6.58841	2.04643	4.77948	1.46783
n'	ENSMUSG00000086269	Tmcc3os	0.39619	0.395632	3.16759	1.00308	5.97969	2.07601	5.39289	2.3674	0.399524	0.39945
n'	ENSMUSG00000086455	Gm11815	3.19862	0.973352	8.30622	1.91541	5.78915	1.31796	5.99103	1.82559	3.17669	1.5161
n'	ENSMUSG00000086721	Gm13750	5.55e-17	0	1.39286	0.743128	1.19559	0.796336	0.798902	0.489239	5.55e-17	0
n'	ENSMUSG00000087579	Hectd2os	10.7266	1.7694	20.1617	2.97203	18.3314	4.56574	19.3307	2.48019	10.3493	1.43556
n'	ENSMUSG00000090093	Gm14399	102.399	6.71123	225.891	19.8382	207.805	11.3117	198.167	14.8403	178.298	13.3793
n'	ENSMUSG00000090255	4921534H16Rik	5.55e-17	0	3.1551	1.00375	0.401466	0.401272	2.39706	1.16388	5.55e-17	0
n'	ENSMUSG00000090342	Vmn2r46	0.803682	0.588162	7.53387	2.70009	2.79704	1.39698	3.39232	1.43973	1.7895	0.370266
n'	ENSMUSG00000098021	Gm9522	7.76165	1.97154	21.7418	1.60898	15.1727	3.32202	19.137	2.7238	8.35467	1.46015
n'	ENSMUSG00000099373	Gm19667	5.55e-17	0	2.39109	1.1649	1.5976	0.745281	0.801659	0.490916	5.55e-17	0
n'	ENSMUSG00000103567	Pcdhga5	389.571	37.1458	540.199	8.55149	498.978	20.394	472.576	25.1649	436.163	25.314
n'	ENSMUSG00000103727	Gm37097	5.55e-17	0	1.59263	0.927936	0.397333	0.397003	1.80054	0.919127	5.55e-17	0
n'	ENSMUSG00000103930	Gm36961	5.55e-17	0	1.78513	1.19359	1.60743	0.984343	1.39305	0.596387	5.55e-17	0
